# Supplementary material for: Rhodium-catalyzed asymmetric addition of arylboronic acids to 2H-chromenes leading to 3-arylchromane derivatives
Source: Royal Society of Chemistry journal article supplement (doi:10.1039/c9cc06221a), 2019-01-01

## Supplementary Information

### Rhodium-catalyzed asymmetric addition of arylboronic acids to 2*H*-chromenes leading to 3-arylchromane derivatives

Moeko Umeda,<sup>a</sup> Kana Sakamoto,<sup>a</sup> Tomotaka Nagai,<sup>b</sup> Midori Nagamoto,<sup>b</sup> Yusuke Ebe,<sup>b</sup> and Takahiro Nishimura<sup>\*,a</sup>

<sup>a</sup>*Department of Chemistry, Graduate School of Science, Osaka City University, Sumiyoshi, Osaka 558-8585, Japan.*

<sup>b</sup>*Department of Chemistry, Graduate School of Science, Kyoto University Sakyo, Kyoto 606-8502, Japan*

E-mail: [tnishi@sci.osaka-cu.ac.jp](mailto:tnishi@sci.osaka-cu.ac.jp)

#### Contents of Supplementary Information:

|                                                               |      |
|---------------------------------------------------------------|------|
| 1. General                                                    | S-2  |
| 2. Materials                                                  | S-2  |
| 3. Preparation of alkenes <b>1</b>                            | S-2  |
| 4. Procedure for Table 1                                      | S-2  |
| 5. Procedure for Table 2 and Scheme 3                         | S-2  |
| 6. Results of the reactions under several reaction conditions | S-3  |
| 7. Characterization of the substrate and products             | S-4  |
| 8. Synthesis of (–)-(S)-equol ( <b>4</b> )                    | S-11 |
| 9. Deuterium-labeling experiments                             | S-11 |
| 10. References                                                | S-13 |
| 11. NMR spectra and chiral HPLC charts                        | S-14 |

## 1. General

All anaerobic and moisture-sensitive manipulations were carried out with standard Schlenk techniques under predried nitrogen. NMR spectra were recorded on a JEOL JNM ECA-400 spectrometer (400 MHz for  $^1\text{H}$  NMR, 100 MHz for  $^{13}\text{C}$  NMR). Chemical shifts are reported in  $\delta$  (ppm) referenced to the residual peaks of  $\text{CDCl}_3$  ( $\delta$  7.26) for  $^1\text{H}$  NMR and  $\text{CDCl}_3$  ( $\delta$  77.00) for  $^{13}\text{C}$  NMR. The following abbreviations are used; s, singlet; d, doublet; t, triplet; q, quartet; quint, quintet; m, multiplet. High-resolution mass spectra were obtained with a JEOL AccuTOF LC-plus JMS-T100LP spectrometer. Optical rotations were measured on JASCO P-2200 polarimeter. Preparative thin-layer chromatography was performed with Silica Gel 70 PF<sub>254</sub> (Wako). Alumina (active 200) for column chromatography was purchased from Nacalai Tesque.

## 2. Materials

Dehydrated solvents were purchased and used after deoxygenated by bubbling  $\text{N}_2$ . Rhodium complexes  $[\text{Rh}(\text{OH})((S,S)\text{-Ph-tfb}^*)]_2$ ,  $[\text{Rh}(\text{OH})((S,S)\text{-Bn-tfb}^*)]_2$ , and  $[\text{Rh}(\text{OH})((S,S)\text{-Fc-tfb}^*)]_2$  were prepared according to the reported procedures.<sup>1</sup> Compounds **2a–j** were purchased from commercial suppliers and used as received.

## 3. Preparation of alkenes **1**

Compound **1a** (CAS: 254-04-6),<sup>2</sup> **1b** (CAS: 457628-47-6),<sup>3</sup> **1c** (CAS: 16336-27-9),<sup>3</sup> **1d** (CAS: 18385-84-7),<sup>3</sup> **1e** (CAS: 1015938-77-8),<sup>3</sup> **1f** (CAS: 42969-79-9),<sup>3</sup> **1g** (CAS: 90448-25-2),<sup>3</sup> **1i** (CAS: 10174-55-7),<sup>4</sup> **1j** (CAS: 254-37-5),<sup>5</sup> **1k** (CAS: 2733-79-1), and **1n** (CAS: 18385-89-2)<sup>6</sup> were prepared according to the reported procedures. Compound **1h** was prepared according to the procedure for **1b**. Compounds **1l** and **1m** were purchased and used as received.

## 4. Procedure for rhodium-catalyzed addition of *p*-tolylboronic acid (**2a**) to 2*H*-chromene (**1a**) (Table 1)

A rhodium complex (5 mol% of Rh) and *p*-tolylboronic acid (**2a**) (271.9 mg, 2.0 mmol) were placed in a Schlenk tube under  $\text{N}_2$ . Then, 1,4-dioxane (0.40 mL) and 2*H*-chromene (**1a**) (26.4 mg, 0.20 mmol) were added to the tube successively, and the mixture was stirred at 60 °C for 20 h. The mixture was passed through a short column of alumina with  $\text{CH}_2\text{Cl}_2$  as an eluent, and the solvent was removed on a rotary evaporator. The ee was measured by chiral HPLC analysis after isolation of the product by preparative TLC on silica gel eluted with EtOAc/hexane (1:50).

## 5. Procedure for rhodium-catalyzed asymmetric addition of arylboronic acids **2** to chromene derivatives **1** (Table 2 and Scheme 3)

$[\text{Rh}(\text{OH})((S,S)\text{-L1})]_2$  (5.0 mg, 0.010 mmol, 5 mol% of Rh) and arylboronic acid **2** (2.0 mmol) were placed in a Schlenk tube under  $\text{N}_2$ . Then, 1,4-dioxane (0.40 mL) and chromene **1** (0.20 mmol) were added to the tube successively, and the mixture was stirred at 60 °C for 20 h. The mixture was passed through a short column of alumina with  $\text{CH}_2\text{Cl}_2$  as an eluent, and the

solvent was removed on a rotary evaporator. The residue was subjected to preparative TLC on silica gel eluted with EtOAc/hexane (1:10–1:50). The ee was measured by chiral HPLC analysis after isolation of the products.

## 6. Results of the reactions under several reaction conditions

Effects of bases, solvents, ligands, and proton sources are shown in Table S1.

**Table S1.** Rh-catalyzed addition of **2** to **1a**

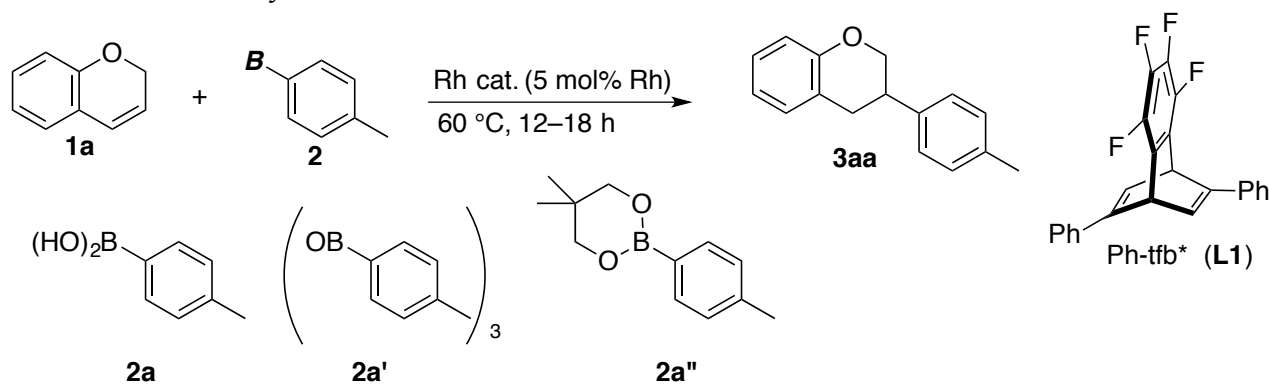

| entry           | catalyst                                          | solvent                                   | boron reagent | note                          | yield (%) <sup>b</sup>                |
|-----------------|---------------------------------------------------|-------------------------------------------|---------------|-------------------------------|---------------------------------------|
| 1               | [Rh(OH)(cod)] <sub>2</sub>                        | 1,4-dioxane                               | <b>2a</b>     | at 80 °C                      | 17                                    |
| 2               | [Rh(OH)(cod)] <sub>2</sub>                        | 1,4-dioxane/H <sub>2</sub> O (9:1)        | <b>2a</b>     | at 80 °C                      | 17                                    |
| 3               | [Rh(OH)(cod)] <sub>2</sub>                        | 1,4-dioxane/H <sub>2</sub> O (9:1)        | <b>2a''</b>   | at 80 °C                      | 17                                    |
| 4               | [Rh(OH)(cod)] <sub>2</sub>                        | toluene/ <i>t</i> -amyl alcohol (1:1)     | <b>2a</b>     | at 80 °C                      | 20                                    |
| 5               | [Rh(OH)(cod)] <sub>2</sub>                        | toluene/ <i>t</i> -amyl alcohol (1:1)     | <b>2a''</b>   | at 80 °C                      | 48                                    |
| 6               | [Rh(OH)(cod)] <sub>2</sub>                        | toluene/methanol (1:1)                    | <b>2a''</b>   | at 80 °C                      | 22                                    |
| 7               | [Rh(OH)(cod)] <sub>2</sub>                        | toluene/ <i>t</i> -amyl alcohol (1:1)     | <b>2a''</b>   |                               | 33                                    |
| 8               | [Rh(OH)(cod)] <sub>2</sub>                        | toluene/H <sub>2</sub> O (20:1)           | <b>2a''</b>   | NaHCO <sub>3</sub> (1 equiv.) | 33                                    |
| 9               | [Rh(OH)(cod)] <sub>2</sub>                        | toluene/ <i>t</i> -amyl alcohol (1:1)     | <b>2a'</b>    |                               | 42                                    |
| 10              | [Rh(OH)(cod)] <sub>2</sub>                        | toluene/methanol (1:1)                    | <b>2a'</b>    |                               | 16                                    |
| 11              | [Rh(OH)(( <i>R,R</i> )- <b>L1</b> )] <sub>2</sub> | 1,4-dioxane                               | <b>2a</b>     |                               | 47 (96% ee) <sup>c</sup>              |
| 12              | [Rh(OH)(( <i>R,R</i> )- <b>L1</b> )] <sub>2</sub> | 1,4-dioxane                               | <b>2a</b>     | Et <sub>3</sub> N (1 equiv.)  | 45                                    |
| 13              | [Rh(OH)(( <i>R,R</i> )- <b>L1</b> )] <sub>2</sub> | toluene/ <i>t</i> -amyl alcohol (1:1)     | <b>2a'</b>    |                               | 24                                    |
| 14              | [Rh(OH)(( <i>R,R</i> )- <b>L1</b> )] <sub>2</sub> | 1,4-dioxane/H <sub>2</sub> O (7.5 equiv.) | <b>2a''</b>   |                               | 49                                    |
| 15              | [Rh(OH)(( <i>R,R</i> )- <b>L1</b> )] <sub>2</sub> | 1,4-dioxane/H <sub>2</sub> O (7.5 equiv.) | <b>2a'</b>    |                               | 42                                    |
| 16              | [Rh(OH)(( <i>R,R</i> )- <b>L1</b> )] <sub>2</sub> | 1,4-dioxane/H <sub>2</sub> O (1.5 equiv.) | <b>2a'</b>    |                               | 46                                    |
| 17 <sup>d</sup> | [Rh(OH)(( <i>S,S</i> )- <b>L1</b> )] <sub>2</sub> | 1,4-dioxane                               | <b>2a</b>     |                               | 45 <sup>e</sup> (97% ee) <sup>c</sup> |
| 18 <sup>e</sup> | [Rh(OH)(( <i>S,S</i> )- <b>L1</b> )] <sub>2</sub> | 1,4-dioxane                               | <b>2a</b>     |                               | 67 <sup>e</sup> (97% ee) <sup>c</sup> |

<sup>a</sup>Reaction conditions: **1a** (0.10 mmol), **2** (2.5 equiv. of B), and Rh catalyst (5 mol% of Rh) in solvent (0.4 mL) at 60 °C for 12–18 h. <sup>b</sup>Determined by <sup>1</sup>H NMR. <sup>c</sup>Determined by HPLC analysis with a chiral stationary phase column: Chiralcel OB-H. <sup>d</sup>The reaction of **1a** (0.20 mmol) with **2a** (0.50 mmol) for 20 h. <sup>e</sup>Isolated yield. <sup>f</sup>The reaction of **1a** (0.20 mmol) with **2a** (2.0 mmol) for 20 h.

## 7. Characterization of the substrate and products

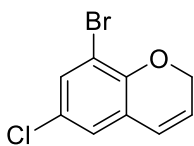

**1h**

**Compound 1h** (Scheme 3: colorless solid).  $^1\text{H}$  NMR ( $\text{CDCl}_3$ )  $\delta$  4.95 (dd,  $J = 3.5, 2.1$  Hz, 2H), 5.83 (dt,  $J = 10.0, 3.5$  Hz, 1H), 6.31 (dd,  $J = 10.0, 2.1$  Hz, 1H), 6.87 (d,  $J = 2.4$  Hz, 1H), 7.29 (d,  $J = 2.4$  Hz, 1H);  $^{13}\text{C}$  NMR ( $\text{CDCl}_3$ )  $\delta$  66.5, 109.9, 123.2, 123.7, 124.2, 125.4, 126.1, 131.6, 149.4. HRMS (DART) calcd for  $\text{C}_9\text{H}_7^{79}\text{Br}^{35}\text{ClO}$  ( $\text{M}+\text{H}$ ) $^+$  244.9369, found 244.9372.

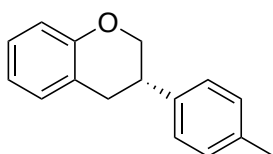

**3aa**

**Compound 3aa** (Table 1, entry 2: colorless solid, 29.9 mg, 67% yield, 97% ee). The ee was measured by HPLC (Chiralcel OB-H, hexane/2-propanol = 98:2, flow 0.5 mL/min, 254 nm,  $t_1 = 13.7$  min (major),  $t_2 = 20.2$  min (minor)):  $[\alpha]_D^{25} -3$  ( $c$  0.71,  $\text{CHCl}_3$ ) for 97% ee (*S*).  $^1\text{H}$  NMR ( $\text{CDCl}_3$ )  $\delta$  2.35 (s, 3H), 3.00 (ddd,  $J = 16.0, 6.2, 1.9$  Hz, 1H), 3.07 (dd,  $J = 16.0, 10.5$  Hz, 1H), 3.23 (tdd,  $J = 10.5, 6.2, 3.7$  Hz, 1H), 4.02 (t,  $J = 10.5$  Hz, 1H), 4.35 (ddd,  $J = 10.5, 3.7, 1.9$  Hz, 1H), 6.81–6.94 (m, 2H), 7.04–7.24 (m, 6H);  $^{13}\text{C}$  NMR ( $\text{CDCl}_3$ )  $\delta$  21.0, 32.4, 38.1, 71.0, 116.5, 120.3, 122.0, 127.2, 127.4, 129.4, 129.8, 136.7, 138.2, 154.3. HRMS (DART) calcd for  $\text{C}_{16}\text{H}_{17}\text{O}$  ( $\text{M}+\text{H}$ ) $^+$  225.1279, found 225.1270.

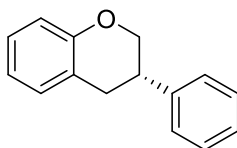

**3ab**

**Compound 3ab** (Table 2, entry 1: colorless solid, 29.4 mg, 70% yield, 96% ee, CAS: 20879-06-5). The ee was measured by HPLC (Chiralcel OJ-H, hexane/2-propanol = 98:2, flow 0.5 mL/min, 254 nm,  $t_1 = 24.8$  min (major),  $t_2 = 31.3$  min (minor)):  $[\alpha]_D^{25} -6$  ( $c$  1.20,  $\text{CHCl}_3$ ) for 96% ee (*S*).  $^1\text{H}$  NMR ( $\text{CDCl}_3$ )  $\delta$  2.98–3.14 (m, 2H), 3.26 (tdd,  $J = 10.5, 6.2, 3.7$  Hz, 1H), 4.05 (t,  $J = 10.5$  Hz, 1H), 4.37 (ddd,  $J = 10.5, 3.7, 2.1$  Hz, 1H), 6.88 (t,  $J = 7.5$  Hz, 2H), 7.08–7.17 (m, 2H), 7.24–7.31 (m, 3H), 7.37 (t,  $J = 7.5$  Hz, 2H).

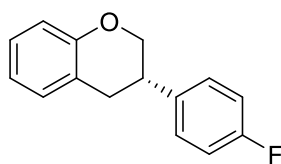

**3ac**

**Compound 3ac** (Table 2, entry 2: colorless solid, 25.1 mg, 55% yield, 97% ee, CAS: 2128324-29-6). The ee was measured by HPLC (Chiralcel OJ-H, hexane/2-propanol = 98:2, flow 0.5 mL/min, 254 nm,  $t_1 = 27.4$  min (major),  $t_2 = 32.0$  min (minor)):  $[\alpha]_D^{25} +0.7$  ( $c$  0.69,  $\text{CHCl}_3$ ) for 97% ee (*S*).  $^1\text{H NMR}$  ( $\text{CDCl}_3$ )  $\delta$  2.99–3.09 (m, 2H), 3.21–3.31 (m, 1H), 4.10 (t,  $J = 10.5$  Hz, 1H), 4.34 (dd,  $J = 10.5, 4.2$  Hz, 1H), 6.85–6.93 (m, 2H), 7.01–7.18 (m, 4H), 7.19–7.25 (m, 2H).

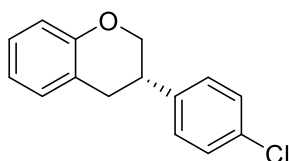

**3ad**

**Compound 3ad** (Table 2, entry 3: colorless solid, 28.6 mg, 59% yield, 94% ee). The ee was measured by HPLC (Chiralcel OB-H, hexane/2-propanol = 98:2, flow 0.5 mL/min, 254 nm,  $t_1 = 19.5$  min (major),  $t_2 = 26.9$  min (minor)):  $[\alpha]_D^{25} +3$  ( $c$  0.78,  $\text{CHCl}_3$ ) for 94% ee (*S*).  $^1\text{H NMR}$  ( $\text{CDCl}_3$ )  $\delta$  2.98–3.09 (m, 2H), 3.18–3.30 (m, 1H), 4.04 (t,  $J = 10.5$  Hz, 1H), 4.33 (dd,  $J = 10.5, 3.2$  Hz, 1H), 6.84–6.92 (m, 2H), 7.06–7.22 (m, 4H), 7.33 (d,  $J = 8.4$  Hz, 2H);  $^{13}\text{C NMR}$  ( $\text{CDCl}_3$ )  $\delta$  32.2, 38.0, 70.5, 116.6, 120.5, 121.5, 127.5, 128.7, 128.9, 129.7, 132.8, 139.8, 154.2. HRMS (DART) calcd for  $\text{C}_{15}\text{H}_{14}^{35}\text{ClO}$  ( $\text{M}+\text{H}$ ) $^+$  245.0733, found 245.0736.

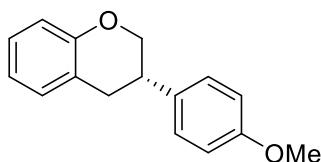

**3ae**

**Compound 3ae** (Table 2, entry 4: colorless solid, 34.3 mg, 72% yield, 95% ee, CAS: 169125-23-9). The ee was measured by HPLC (Chiralcel OJ-H, hexane/2-propanol = 10:1, flow 0.5 mL/min, 254 nm,  $t_1 = 23.4$  min (major),  $t_2 = 27.7$  min (minor)):  $[\alpha]_D^{25} -2$  ( $c$  0.43,  $\text{CHCl}_3$ ) for 95% ee (*S*).  $^1\text{H NMR}$  ( $\text{CDCl}_3$ )  $\delta$  2.99 (dd,  $J = 16.0, 6.5$  Hz, 1H), 3.05 (dd,  $J = 16.0, 10.5$  Hz, 1H), 3.22 (tdd,  $J = 10.5, 6.5, 3.6$  Hz, 1H), 3.81 (s, 3H), 3.99 (t,  $J = 10.5$  Hz, 1H), 4.33 (ddd,  $J = 10.5, 3.6, 1.8$  Hz, 1H), 6.84–6.93 (m, 4H), 7.08–7.16 (m, 2H), 7.18 (d,  $J = 8.7$  Hz, 2H).

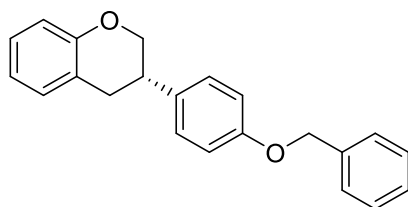

**3af**

**Compound 3af** (Table 2, entry 5: colorless solid, 34.6 mg, 55% yield, 97% ee). The ee was measured by HPLC (Chiralpak IA, hexane/CHCl<sub>3</sub> = 9:1, flow 0.5 mL/min, 254 nm,  $t_1$  = 24.5 min (major),  $t_2$  = 28.3 min (minor)):  $[\alpha]_D^{25} -3$  ( $c$  0.73, CHCl<sub>3</sub>) for 97% ee (*S*). <sup>1</sup>H NMR (CDCl<sub>3</sub>)  $\delta$  2.95–3.09 (m, 2H), 3.21 (tdd,  $J$  = 10.5, 6.5, 3.4 Hz, 1H), 4.00 (t,  $J$  = 10.5 Hz, 1H), 4.33 (ddd,  $J$  = 10.5, 3.4, 1.6 Hz, 1H), 5.07 (s, 2H), 6.88 (td,  $J$  = 8.0, 1.6 Hz, 2H), 6.97 (d,  $J$  = 8.4 Hz, 2H), 7.07–7.21 (m, 4H), 7.30–7.48 (m, 5H); <sup>13</sup>C NMR (CDCl<sub>3</sub>)  $\delta$  32.5, 37.7, 70.0, 71.0, 115.1, 116.5, 120.3, 122.0, 127.39, 127.44, 128.0, 128.3, 128.6, 129.8, 133.6, 137.0, 154.3, 157.8. HRMS (DART) calcd for C<sub>22</sub>H<sub>21</sub>O<sub>2</sub> (M+H)<sup>+</sup> 317.1542, found 317.1538.

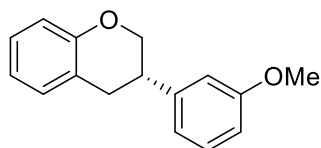

**3ag**

**Compound 3ag** (Table 2, entry 6: pale yellow solid, 21.6 mg, 45% yield, 95% ee). The ee was measured by HPLC (Chiralcel OJ-H, hexane/2-propanol = 19:1, flow 0.5 mL/min, 254 nm,  $t_1$  = 24.8 min (major),  $t_2$  = 28.5 min (minor)):  $[\alpha]_D^{25} -2$  ( $c$  0.68, CHCl<sub>3</sub>) for 95% ee (*S*). <sup>1</sup>H NMR (CDCl<sub>3</sub>)  $\delta$  2.97–3.13 (m, 2H), 3.24 (tdd,  $J$  = 10.8, 6.5, 3.6 Hz, 1H), 3.82 (s, 3H), 4.04 (t,  $J$  = 10.8 Hz, 1H), 4.37 (ddd,  $J$  = 10.8, 3.6, 1.9 Hz, 1H), 6.78–6.92 (m, 5H), 7.08–7.15 (m, 2H), 7.29 (t,  $J$  = 7.8 Hz, 1H); <sup>13</sup>C NMR (CDCl<sub>3</sub>)  $\delta$  32.3, 38.6, 55.2, 70.8, 112.0, 113.5, 116.5, 119.6, 120.4, 121.9, 127.4, 129.8, 142.9, 154.2, 159.8. HRMS (DART) calcd for C<sub>16</sub>H<sub>17</sub>O<sub>2</sub> (M+H)<sup>+</sup> 241.1229, found 241.1219.

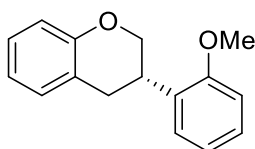

**3ah**

**Compound 3ah** (Table 2, entry 7: pale yellow solid, 21.7 mg, 45% yield, 95% ee). The ee was measured by HPLC (Chiralcel OJ-H, hexane/2-propanol = 10:1, flow 0.5 mL/min, 254 nm,  $t_1$  = 19.1 min (major),  $t_2$  = 21.7 min (minor)):  $[\alpha]_D^{25} +7$  ( $c$  0.57, CHCl<sub>3</sub>) for 95% ee (*S*). <sup>1</sup>H NMR (CDCl<sub>3</sub>)  $\delta$  2.98 (ddd,  $J$  = 16.0, 5.5, 2.0 Hz, 1H), 3.11 (dd,  $J$  = 16.0, 10.6 Hz, 1H), 3.71 (tdd,  $J$  = 10.6, 5.5, 3.6 Hz, 1H), 3.85 (s, 3H), 4.08 (t,  $J$  = 10.6 Hz, 1H), 4.38 (ddd,  $J$  = 10.6, 3.6, 2.0 Hz, 1H), 6.85–

6.99 (m, 4H), 7.08–7.18 (m, 3H), 7.23–7.30 (m, 1H);  $^{13}\text{C}$  NMR ( $\text{CDCl}_3$ )  $\delta$  30.9, 31.9, 55.3, 69.9, 110.5, 116.5, 120.2, 120.7, 122.4, 127.1, 127.3, 127.9, 129.4, 129.8, 154.4, 157.3. HRMS (DART) calcd for  $\text{C}_{16}\text{H}_{17}\text{O}_2$  ( $\text{M}+\text{H}$ ) $^+$  241.1229, found 241.1227.

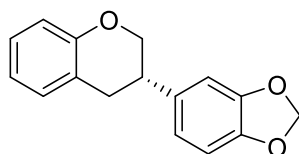

**3ai**

**Compound 3ai** (Table 2, entry 8: colorless solid, 25.9 mg, 53% yield, 96% ee). The ee was measured by HPLC (Chiralcel OJ-H, hexane/2-propanol = 10:1, flow 0.5 mL/min, 254 nm,  $t_1$  = 27.8 min (major),  $t_2$  = 30.8 min (minor)):  $[\alpha]_{\text{D}}^{25}$  +2 ( $c$  0.54,  $\text{CHCl}_3$ ) for 96% ee (*S*).  $^1\text{H}$  NMR ( $\text{CDCl}_3$ )  $\delta$  2.94–3.06 (m, 2H), 3.14–3.23 (m, 1H), 3.97 (t,  $J$  = 10.5 Hz, 1H), 4.32 (dd,  $J$  = 10.5, 3.8 Hz, 1H), 5.96 (s, 2H), 6.69–6.74 (m, 2H), 6.80 (d,  $J$  = 7.6 Hz, 1H), 6.83–6.91 (m, 2H), 7.09 (d,  $J$  = 7.6 Hz, 1H), 7.13 (t,  $J$  = 7.6 Hz, 1H);  $^{13}\text{C}$  NMR ( $\text{CDCl}_3$ )  $\delta$  32.6, 38.3, 71.0, 101.0, 107.7, 108.5, 116.5, 120.35, 120.38, 121.8, 127.4, 129.7, 135.2, 146.5, 147.9, 154.2. HRMS (DART) calcd for  $\text{C}_{16}\text{H}_{15}\text{O}_3$  ( $\text{M}+\text{H}$ ) $^+$  255.1021, found 255.1021.

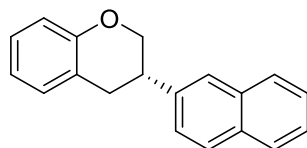

**3aj**

**Compound 3aj** (Table 2, entry 9: colorless solid, 27.9 mg, 54% yield, 92% ee, CAS: 2128324-32-1). The ee was measured by HPLC (Chiralcel OB-H, hexane/2-propanol = 98:2, flow 0.5 mL/min, 254 nm,  $t_1$  = 28.3 min (major),  $t_2$  = 40.3 min (minor)):  $[\alpha]_{\text{D}}^{25}$  +19 ( $c$  1.01,  $\text{CHCl}_3$ ) for 92% ee (*S*).  $^1\text{H}$  NMR ( $\text{CDCl}_3$ )  $\delta$  3.11 (dd,  $J$  = 16.0, 3.6 Hz, 1H), 3.21 (dd,  $J$  = 16.0, 10.7 Hz, 1H), 3.38–3.48 (m, 1H), 4.15 (t,  $J$  = 10.7 Hz, 1H), 4.46 (dt,  $J$  = 10.7, 2.4 Hz, 1H), 6.87–6.93 (m, 2H), 7.09–7.17 (m, 2H), 7.40 (d,  $J$  = 7.5 Hz, 1H), 7.39–7.51 (m, 2H), 7.70 (s, 1H), 7.81–7.86 (m, 3H).

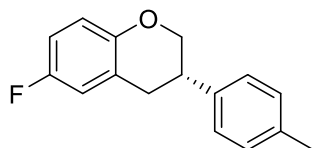

**3ba**

**Compound 3ba** (Scheme 3: pale yellow solid, 37.1 mg, 77% yield, 92% ee). The ee was measured by HPLC (Chiralcel OB-H, hexane/2-propanol = 98:2, flow 0.5 mL/min, 254 nm,  $t_1$  = 10.9 min (major),  $t_2$  = 13.4 min (minor)):  $[\alpha]_{\text{D}}^{25}$  -9 ( $c$  1.09,  $\text{CHCl}_3$ ) for 92% ee (*S*).  $^1\text{H}$  NMR ( $\text{CDCl}_3$ )  $\delta$  2.36 (s, 3H), 2.93–3.09 (m, 2H), 3.21 (tdd,  $J$  = 10.5, 6.7, 3.7 Hz, 1H), 3.99 (t,  $J$  = 10.5

Hz, 1H), 4.33 (ddd,  $J = 10.5, 3.7, 2.0$  Hz, 1H), 6.77–6.87 (m, 3H), 7.14 (d,  $J = 8.2$  Hz, 2H), 7.19 (d,  $J = 8.2$  Hz, 2H);  $^{13}\text{C}$  NMR ( $\text{CDCl}_3$ )  $\delta$  21.0, 32.5, 37.8, 71.0, 114.1 (d,  $J_{\text{C-F}} = 23$  Hz), 115.5 (d,  $J_{\text{C-F}} = 23$  Hz), 117.3 (d,  $J_{\text{C-F}} = 8$  Hz), 123.1 (d,  $J_{\text{C-F}} = 8$  Hz), 127.2, 129.5, 136.8, 137.9, 150.3, 156.7 (d,  $J_{\text{C-F}} = 237$  Hz). HRMS (DART) calcd for  $\text{C}_{16}\text{H}_{16}\text{FO}$  ( $\text{M}+\text{H}$ ) $^+$  243.1185, found 243.1180.

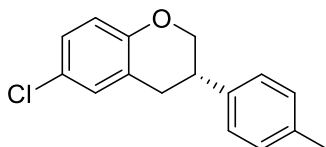

**3ca**

**Compound 3ca** (Scheme 3: pale yellow solid, 39.1 mg, 76% yield, 97% ee). The ee was measured by HPLC (Chiralcel OB-H, hexane/2-propanol = 98:2, flow 0.5 mL/min, 254 nm,  $t_1 = 11.9$  min (major),  $t_2 = 13.4$  min (minor)):  $[\alpha]_{\text{D}}^{25} -0.8$  ( $c$  0.82,  $\text{CHCl}_3$ ) for 97% ee (*S*).  $^1\text{H}$  NMR ( $\text{CDCl}_3$ )  $\delta$  2.37 (s, 3H), 2.93–3.08 (m, 2H), 3.20 (tdd,  $J = 10.8, 6.6, 3.5$  Hz, 1H), 4.01 (t,  $J = 10.8$  Hz, 1H), 4.35 (ddd,  $J = 10.8, 3.5, 2.2$  Hz, 1H), 6.81 (d,  $J = 9.2$  Hz, 1H), 7.06–7.14 (m, 2H), 7.15 (d,  $J = 8.0$  Hz, 2H), 7.20 (d,  $J = 8.0$  Hz, 2H);  $^{13}\text{C}$  NMR ( $\text{CDCl}_3$ )  $\delta$  21.0, 32.2, 37.7, 71.0, 117.8, 123.6, 125.0, 127.2, 127.3, 129.2, 129.5, 136.9, 137.7, 152.9. HRMS (DART) calcd for  $\text{C}_{16}\text{H}_{16}^{35}\text{ClO}$  ( $\text{M}+\text{H}$ ) $^+$  259.0890, found 259.0896.

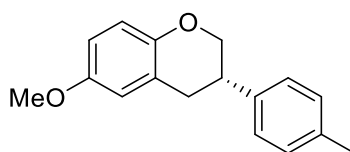

**3da**

**Compound 3da** (Scheme 3: colorless solid, 26.3 mg, 52% yield, 96% ee). The ee was measured by HPLC (Chiralcel OB-H, hexane/2-propanol = 98:2, flow 0.5 mL/min, 254 nm,  $t_1 = 19.1$  min (major),  $t_2 = 23.9$  min (minor)):  $[\alpha]_{\text{D}}^{25} -3$  ( $c$  0.86,  $\text{CHCl}_3$ ) for 96% ee (*S*).  $^1\text{H}$  NMR ( $\text{CDCl}_3$ )  $\delta$  2.36 (s, 3H), 2.98 (ddd,  $J = 16.0, 5.8, 2.0$  Hz, 1H), 3.06 (dd,  $J = 16.0, 10.5$  Hz, 1H), 3.22 (tdd,  $J = 10.5, 5.8, 3.7$  Hz, 1H), 3.78 (s, 3H), 3.98 (t,  $J = 10.5$  Hz, 1H), 4.31 (ddd,  $J = 10.5, 3.7, 2.0$  Hz, 1H), 6.65 (d,  $J = 2.8$  Hz, 1H), 6.73 (dd,  $J = 9.0, 2.8$  Hz, 1H), 6.81 (d,  $J = 8.8$  Hz, 1H), 7.15 (d,  $J = 8.4$  Hz, 2H), 7.18 (d,  $J = 8.4$  Hz, 2H);  $^{13}\text{C}$  NMR ( $\text{CDCl}_3$ )  $\delta$  21.0, 32.7, 38.2, 55.7, 70.9, 113.4, 114.2, 117.1, 122.6, 127.2, 129.4, 136.7, 138.3, 148.3, 153.3. HRMS (DART) calcd for  $\text{C}_{17}\text{H}_{19}\text{O}_2$  ( $\text{M}+\text{H}$ ) $^+$  255.1385, found 255.1383.

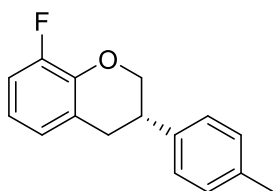



### 3ea

**Compound 3ea** (Scheme 3: pale yellow solid, 29.4 mg, 61% yield, 96% ee). The ee was measured by HPLC (Chiralcel OJ-H, hexane/2-propanol = 98:2, flow 0.5 mL/min, 254 nm,  $t_1$  = 27.7 min (major),  $t_2$  = 34.4 min (minor)):  $[\alpha]_D^{25}$  -5 ( $c$  1.30,  $\text{CHCl}_3$ ) for 96% ee (*S*).  $^1\text{H NMR}$  ( $\text{CDCl}_3$ )  $\delta$  2.36 (s, 3H), 2.97–3.12 (m, 2H), 3.24 (tdd,  $J$  = 10.5, 5.5, 3.7 Hz, 1H), 4.05 (t,  $J$  = 10.5 Hz, 1H), 4.45 (ddd,  $J$  = 10.5, 3.7, 1.9 Hz, 1H), 6.76–6.82 (m, 1H), 6.87 (d,  $J$  = 7.2 Hz, 1H), 6.90–6.98 (m, 1H), 7.15 (d,  $J$  = 8.2 Hz, 2H), 7.19 (d,  $J$  = 8.2 Hz, 2H);  $^{13}\text{C NMR}$  ( $\text{CDCl}_3$ )  $\delta$  21.0, 32.1, 37.8, 71.1, 113.7 (d,  $J_{\text{C-F}}$  = 18 Hz), 113.9 (d,  $J_{\text{C-F}}$  = 8 Hz), 124.6 (d,  $J_{\text{C-F}}$  = 10 Hz), 124.7, 127.2, 129.5, 136.9, 137.6, 142.5 (d,  $J_{\text{C-F}}$  = 11 Hz), 151.6 (d,  $J_{\text{C-F}}$  = 243 Hz). HRMS (DART) calcd for  $\text{C}_{16}\text{H}_{16}\text{FO}$  ( $\text{M}+\text{H}$ ) $^+$  243.1185, found 243.1194.

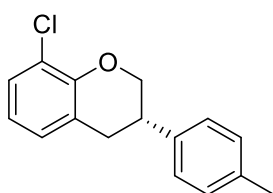

### 3fa

**Compound 3fa** (Scheme 3: pale yellow solid, 30.0 mg, 58% yield, 95% ee). The ee was measured by HPLC (Chiralcel OJ-H, hexane/2-propanol = 98:2, flow 0.5 mL/min, 254 nm,  $t_1$  = 29.4 min (major),  $t_2$  = 35.4 min (minor)):  $[\alpha]_D^{25}$  -31 ( $c$  1.14,  $\text{CHCl}_3$ ) for 95% ee (*S*).  $^1\text{H NMR}$  ( $\text{CDCl}_3$ )  $\delta$  2.37 (s, 3H), 3.01 (ddd,  $J$  = 16.0, 5.6, 2.0 Hz, 1H), 3.08 (dd,  $J$  = 16.0, 10.7 Hz, 1H), 3.23 (tdd,  $J$  = 10.7, 5.6, 3.8 Hz, 1H), 4.08 (t,  $J$  = 10.7 Hz, 1H), 4.51 (ddd,  $J$  = 10.7, 3.8, 2.0 Hz, 1H), 6.82 (t,  $J$  = 7.5 Hz, 1H), 7.01 (d,  $J$  = 7.5 Hz, 1H), 7.15 (d,  $J$  = 8.2 Hz, 2H), 7.20 (d,  $J$  = 8.2 Hz, 2H), 7.23 (d,  $J$  = 7.5 Hz, 1H);  $^{13}\text{C NMR}$  ( $\text{CDCl}_3$ )  $\delta$  21.0, 32.5, 37.8, 71.6, 120.4, 121.4, 123.8, 127.2, 128.0, 128.1, 129.5, 136.9, 137.5, 149.9. HRMS (DART) calcd for  $\text{C}_{16}\text{H}_{16}^{35}\text{ClO}$  ( $\text{M}+\text{H}$ ) $^+$  259.0890, found 259.0890.

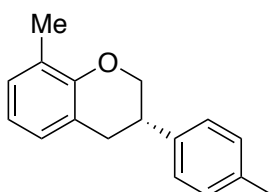

### 3ga

**Compound 3ga** (Scheme 3: colorless solid, 24.7 mg, 52% yield, 97% ee). The ee was measured by HPLC (Chiralcel OB-H, hexane/2-propanol = 98:2, flow 0.5 mL/min, 254 nm,  $t_1$  = 18.1 min (major),  $t_2$  = 22.5 min (minor)):  $[\alpha]_D^{25}$  -14 ( $c$  0.77,  $\text{CHCl}_3$ ) for 97% ee (*S*).  $^1\text{H NMR}$  ( $\text{CDCl}_3$ )  $\delta$  2.24 (s, 3H), 2.37 (s, 3H), 3.00 (ddd,  $J$  = 16.0, 6.3, 2.2 Hz, 1H), 3.08 (dd,  $J$  = 16.0, 10.8 Hz, 1H), 3.22 (tdd,  $J$  = 10.8, 6.3, 3.9 Hz, 1H), 4.02 (t,  $J$  = 10.8 Hz, 1H), 4.42 (ddd,  $J$  = 10.8, 3.9, 2.2 Hz, 1H), 6.80 (t,  $J$  = 7.4 Hz, 1H), 6.97 (d,  $J$  = 7.0 Hz, 1H), 7.02 (d,  $J$  = 7.0 Hz, 1H), 7.17 (d,  $J$  = 8.2

Hz, 2H), 7.20 (d,  $J = 8.2$  Hz, 2H);  $^{13}\text{C}$  NMR ( $\text{CDCl}_3$ )  $\delta$  16.1, 21.0, 32.6, 38.2, 71.1, 119.7, 121.5, 125.7, 127.2, 127.3, 128.5, 129.4, 136.6, 138.4, 152.4. HRMS (DART) calcd for  $\text{C}_{17}\text{H}_{19}\text{O}$  ( $\text{M}+\text{H}$ ) $^+$  239.1436, found 239.1436.

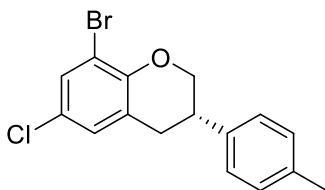

**3ha**

**Compound 3ha** (Scheme 3: pale yellow solid, 49.6 mg, 73% yield, 92% ee). The ee was measured by HPLC (Chiralcel OB-H, hexane/2-propanol = 98:2, flow 0.5 mL/min, 254 nm,  $t_1 = 23.0$  min (major),  $t_2 = 28.8$  min (minor)):  $[\alpha]_{\text{D}}^{25} -19$  ( $c$  1.02,  $\text{CHCl}_3$ ) for 92% ee (*S*).  $^1\text{H}$  NMR ( $\text{CDCl}_3$ )  $\delta$  2.36 (s, 3H), 2.97 (ddd,  $J = 16.4, 5.6, 2.1$  Hz, 1H), 3.05 (dd,  $J = 16.4, 10.8$  Hz, 1H), 3.20 (tdd,  $J = 10.8, 5.6, 3.7$  Hz, 1H), 4.06 (t,  $J = 10.8$  Hz, 1H), 4.48 (ddd,  $J = 10.8, 3.7, 2.1$  Hz, 1H), 7.04 (d,  $J = 2.8$  Hz, 1H), 7.12 (d,  $J = 7.6$  Hz, 2H), 7.19 (d,  $J = 7.6$  Hz, 2H), 7.38 (d,  $J = 2.8$  Hz, 1H);  $^{13}\text{C}$  NMR ( $\text{CDCl}_3$ )  $\delta$  21.0, 32.4, 37.5, 71.8, 111.0, 124.8, 125.1, 127.1, 128.5, 129.6, 130.5, 136.9, 137.1, 149.7. HRMS (DART) calcd for  $\text{C}_{16}\text{H}_{15}^{79}\text{Br}^{35}\text{ClO}$  ( $\text{M}+\text{H}$ ) $^+$  336.9995, found 336.9990.

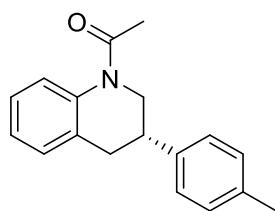

**3ia**

**Compound 3ia** (Scheme 3: colorless solid, 40.6 mg, 76% yield, 97% ee). The ee was measured by HPLC (Chiralpak IB, hexane/ $\text{CHCl}_3 = 4:1$ , flow 0.5 mL/min, 254 nm,  $t_1 = 33.4$  min (minor),  $t_2 = 34.2$  min (major)):  $[\alpha]_{\text{D}}^{25} +26$  ( $c$  0.98,  $\text{CHCl}_3$ ) for 97% ee (*S*).  $^1\text{H}$  NMR ( $\text{CDCl}_3$ )  $\delta$  2.21 (s, 3H), 2.34 (s, 3H), 2.86–3.01 (m, 1H), 3.12–3.23 (m, 2H), 3.65 (dd,  $J = 12.6, 9.8$  Hz, 1H), 4.21 (br s, 1H), 7.09–7.26 (m, 8H);  $^{13}\text{C}$  NMR ( $\text{CDCl}_3$ )  $\delta$  21.0, 23.2, 34.8, 41.2, 49.2 (br), 124.5, 125.1, 126.1, 127.0, 128.7, 129.4, 132.2 (br), 136.6, 139.0 (br), 139.7, 170.1. HRMS (ESI) calcd for  $\text{C}_{18}\text{H}_{19}\text{NNaO}$  ( $\text{M}+\text{Na}$ ) $^+$  288.1364, found 288.1362.

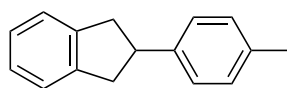

**3ma**

**Compound 3ma** (CAS: 80393-27-7, colorless solid, 9.2 mg, 22% yield).  $^1\text{H}$  NMR ( $\text{CDCl}_3$ )  $\delta$  2.34 (s, 3H), 3.06 (dd,  $J = 15.4, 8.6$  Hz, 2H), 3.33 (dd,  $J = 15.4, 8.6$  Hz, 2H), 3.66 (quint,  $J = 8.6$  Hz, 1H), 7.12 (d,  $J = 7.6$  Hz, 2H), 7.16–7.26 (m, 6H).

## 8. Synthesis of (–)-(S)-equol (**4**)

A mixture of  $[\text{Rh}(\text{OH})((S,S)\text{-L1})_2]$  (5.0 mg, 0.010 mmol, 5 mol% of Rh) and *p*-methoxyphenylboronic acid (**2e**) (101 mg, 0.66 mmol), and chromene **1n** (32.4 mg, 0.20 mmol) in 1,4-dioxane (0.40 mL) was stirred at 60 °C for 1 h. Then, **2e** (101 mg, 0.66 mmol) was added to the mixture every 1 h twice, and the mixture was stirred at 60 °C for 18 h. The mixture was passed through a short column of alumina with  $\text{CH}_2\text{Cl}_2$  as an eluent, and the solvent was removed on a rotary evaporator. The residue was subjected to preparative TLC on silica gel eluted with EtOAc/hexane (1:20) to give **3ne** (23.0 mg, 43% yield). **Compound 3ne**<sup>7</sup> (Scheme 4: colorless solid, 92% ee). The ee was measured by HPLC (Chiralcel OJ-H, hexane/2-propanol = 9:1, flow 0.5 mL/min, 254 nm,  $t_1$  = 44.0 min (major),  $t_2$  = 54.9 min (minor)):  $[\alpha]_{\text{D}}^{25} -14$  (*c* 0.94,  $\text{CHCl}_3$ ) for 92% ee (*S*). <sup>1</sup>H NMR ( $\text{CDCl}_3$ )  $\delta$  2.89–3.01 (m, 2H), 3.18 (tdd, *J* = 9.7, 6.8, 3.4 Hz, 1H), 3.78 (s, 3H), 3.81 (s, 3H), 3.98 (t, *J* = 10.5 Hz, 1H), 4.31 (dd, *J* = 10.5, 4.0 Hz, 1H), 4.73 (d, *J* = 2.4 Hz, 1H), 6.48 (dd, *J* = 8.4, 2.4 Hz, 1H), 6.97 (d, *J* = 8.8 Hz, 2H), 6.99 (d, *J* = 8.8 Hz, 1H), 7.17 (d, *J* = 8.8 Hz, 2H).

A mixture of compound **3ne** (19.0 mg, 0.070 mmol) and pyridinium chloride (203.1 mg, 1.8 mmol) was heated at 160 °C for 48 h. After cooling to room temperature, ethyl acetate and water were added to the mixture. The organic layer was washed with water and brine, dried over anhydrous  $\text{Na}_2\text{SO}_4$ , filtered, and concentrated on a rotary evaporator. The residue was subjected to preparative TLC on silica gel eluted with EtOAc/hexane (3:1) to give **4** as a colorless solid (12.2 mg, 72% yield). **Compound 4**:  $[\alpha]_{\text{D}}^{25} -15$  (*c* 0.94, EtOH) for 92% ee (*S*). <sup>1</sup>H NMR (acetone-*d*<sub>6</sub>)  $\delta$  2.77–2.94 (m, 2H), 3.06 (tdd, *J* = 12.0, 6.0, 3.4 Hz, 1H), 3.92 (t, *J* = 10.6 Hz, 1H), 4.18 (ddd, *J* = 10.6, 3.4, 1.8 Hz, 1H), 6.27 (d, *J* = 2.1 Hz, 1H), 6.35 (dd, *J* = 8.3, 2.1 Hz, 1H), 6.81 (d, *J* = 8.4 Hz, 2H), 6.88 (d, *J* = 8.3 Hz, 1H), 7.15 (d, *J* = 8.4 Hz, 2H), 8.14 (br s, 1H), 8.27 (br s, 1H). The ee of obtained compound **4** was determined by chiral HPLC analysis of compound **3ne**, which was derived from **4** as shown below.

Compound **4** (11.4 mg, 0.047 mmol), potassium carbonate (15.6 mg, 0.11 mmol), iodomethane (7.1  $\mu\text{L}$ , 0.11 mmol), and acetone (0.2 mL) were placed in a Schlenk tube under  $\text{N}_2$ , and the mixture was stirred at 60 °C overnight. The mixture was passed through a short silica gel pad with EtOAc as an eluent, and the solvent was removed on a rotary evaporator. The residue was subjected to preparative TLC on silica gel eluted with EtOAc/hexane (1:10) to give **3ne** (12.3 mg, 97% yield, 92% ee). The ee was measured by HPLC (Chiralcel OJ-H, hexane/2-propanol = 9:1, flow 0.5 mL/min, 254 nm,  $t_1$  = 39.9 min (major),  $t_2$  = 50.1 min (minor)).

## 9. Deuterium-labeling experiments

### Procedure for eqn (1)

*p*-Tolylboroxine (**2a'**) (117.9 mg, 0.33 mmol),  $\text{D}_2\text{O}$  (1 mmol, 18  $\mu\text{L}$ ), and 1,4-dioxane (0.20 mL) were placed in a Schlenk tube under  $\text{N}_2$ , and the mixture was stirred at 60 °C for 30 min. After cooling to room temperature,  $[\text{Rh}(\text{OH})((S,S)\text{-L1})_2]$  (2.5 mg, 0.0050 mmol, 5 mol% of Rh) and 2*H*-chromene (**1a**) (13.2 mg, 0.10 mmol) were added to the tube successively, and the mixture was

stirred at 60 °C for 20 h. The mixture was passed through a short column of alumina with CH<sub>2</sub>Cl<sub>2</sub> as an eluent. The solvent was removed on a rotary evaporator, and the residue was subjected to preparative TLC on silica gel [hexane/EtOAc (50:1)]. The deuterium contents of the product was determined by <sup>1</sup>H NMR (CD<sub>2</sub>Cl<sub>2</sub>). <sup>2</sup>H NMR (CH<sub>2</sub>Cl<sub>2</sub>) was also measured to determine the position of the deuterium incorporation.

### **Procedure for eqn (2)**

[Rh(OH)((*S,S*)-**L1**)]<sub>2</sub> (2.5 mg, 0.0050 mmol, 5 mol% of Rh) and **2b-d<sub>5</sub>** (126.9 mg, 1.0 mmol) were placed in a Schlenk tube under N<sub>2</sub>. Then, 1,4-dioxane (0.20 mL) and 2*H*-chromene (**1a**) (13.2 mg, 0.10 mmol) were added to the tube successively, and the mixture was stirred at 60 °C for 20 h. The mixture was passed through a short column of alumina with CH<sub>2</sub>Cl<sub>2</sub> as an eluent. The solvent was removed on a rotary evaporator, and the residue was subjected to preparative TLC on silica gel [hexane/EtOAc (20:1)]. The deuterium contents of the product was determined by <sup>1</sup>H NMR (CD<sub>2</sub>Cl<sub>2</sub>). <sup>2</sup>H NMR (CH<sub>2</sub>Cl<sub>2</sub>) was also measured to determine the position of the deuterium incorporation.

## 10. References

- 1 (a) T. Nishimura, H. Kumamoto, M. Nagaosa and T. Hayashi, *Chem. Commun.*, 2009, 5713; (b)
- 2 R. C. Larock, L. Wei and T. R. Hightower, *Synlett*, 1998, 522.
- 3 I. N. Lykakis, C. Efe, C. Gryparis and M. Stratakis, *Eur. J. Org. Chem.*, 2011, 2334.
- 4 H. Katayama, M. Ohkoshi and M. Yasue, *Chem. Pharm. Bull.*, 1980, **28**, 2226.
- 5 C. H. Chen, G. A. Reynolds, N. Zumbulyadis and J. A. V. Allan, *J. Heterocyclic Chem.*, 1978, **15**, 289.
- 6 S. Chang and R. H. Grubbs, *J. Org. Chem.*, 1998, **63**, 864.
- 7 J. Xia, Y. Nie, G. Yang, Y. Liu and W. Zhang, *Org. Lett.* 2017, **19**, 4884.

# 11. NMR spectra and HPLC charts

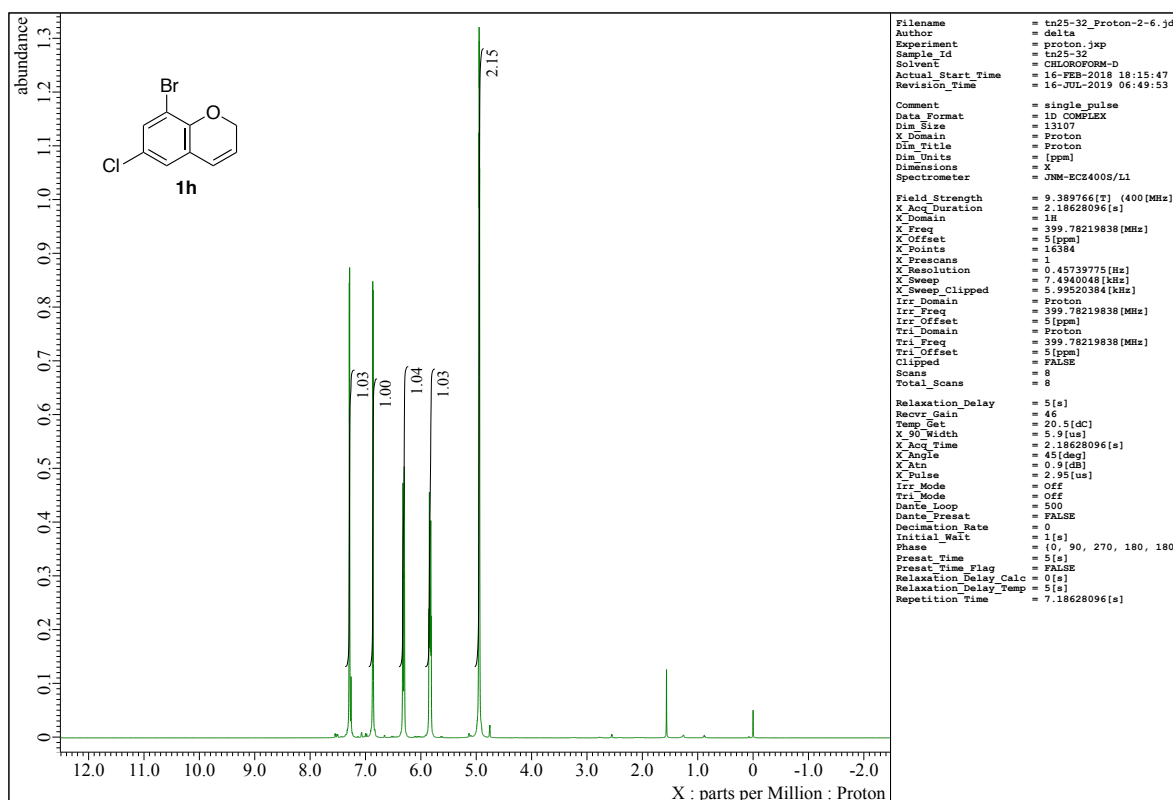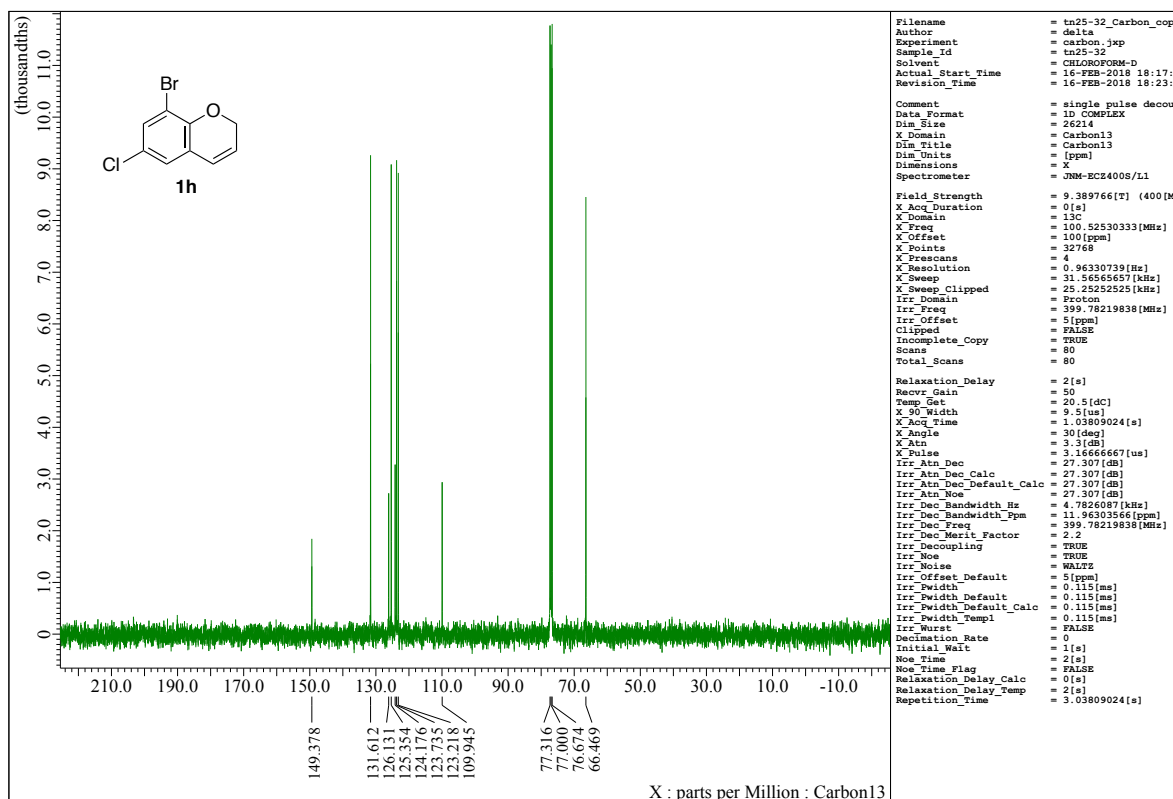

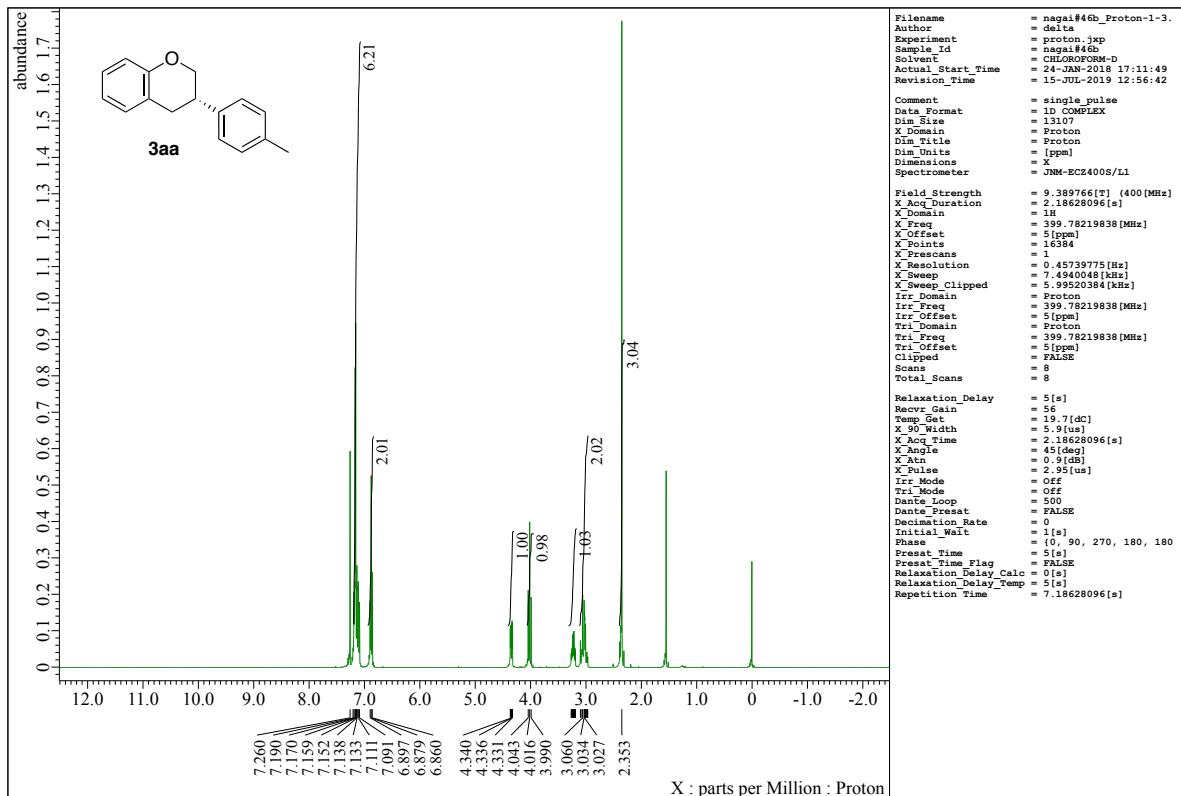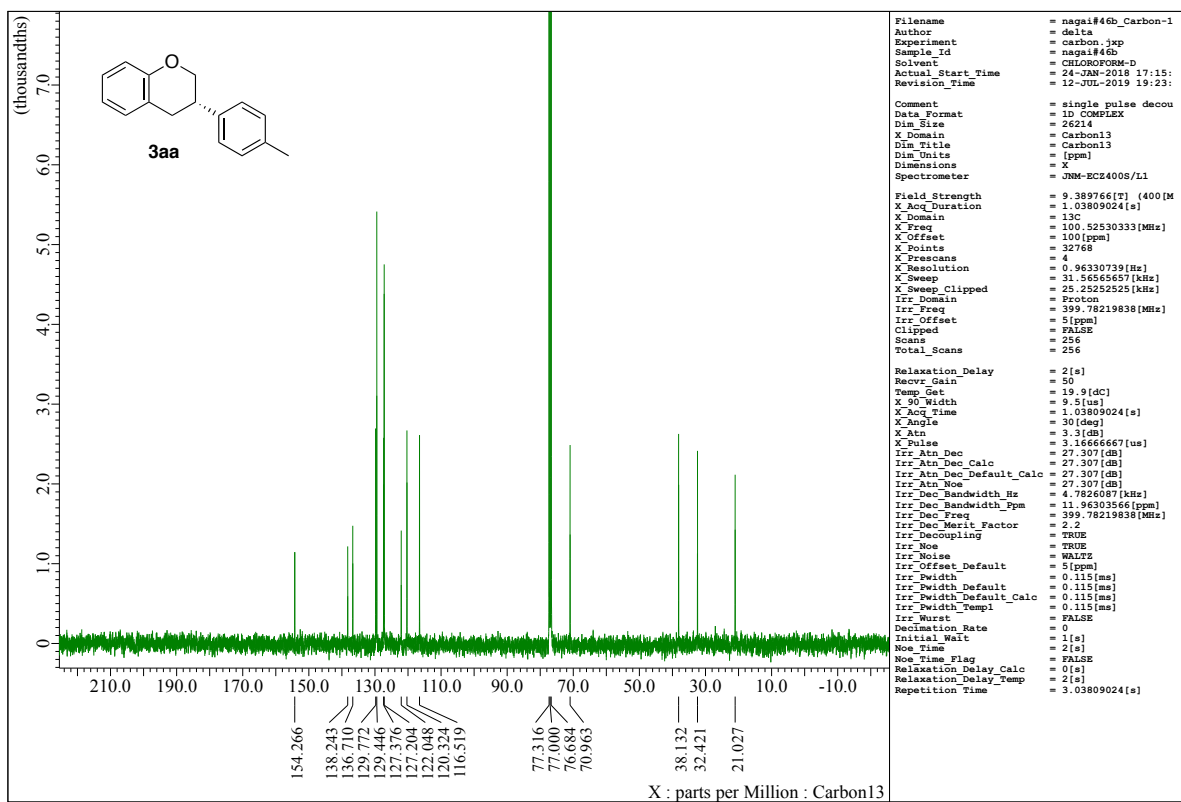

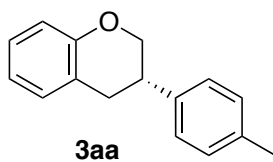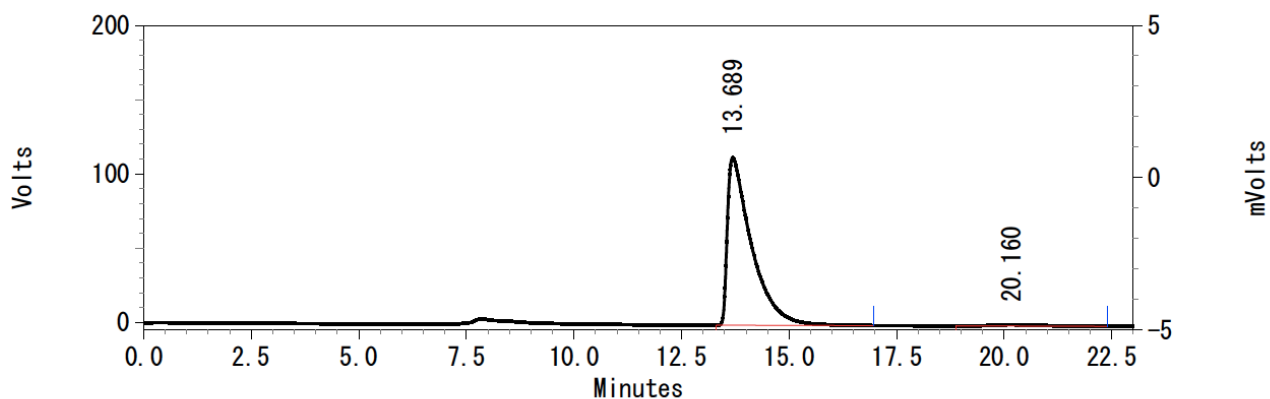

**UV Results**

| Pk # | Retention Time | Area    | Area Percent | Height |
|------|----------------|---------|--------------|--------|
| 1    | 13.689         | 4404676 | 98.523       | 112785 |
| 2    | 20.160         | 66033   | 1.477        | 863    |

|        |  |         |         |        |
|--------|--|---------|---------|--------|
| Totals |  | 4470709 | 100.000 | 113648 |
|--------|--|---------|---------|--------|

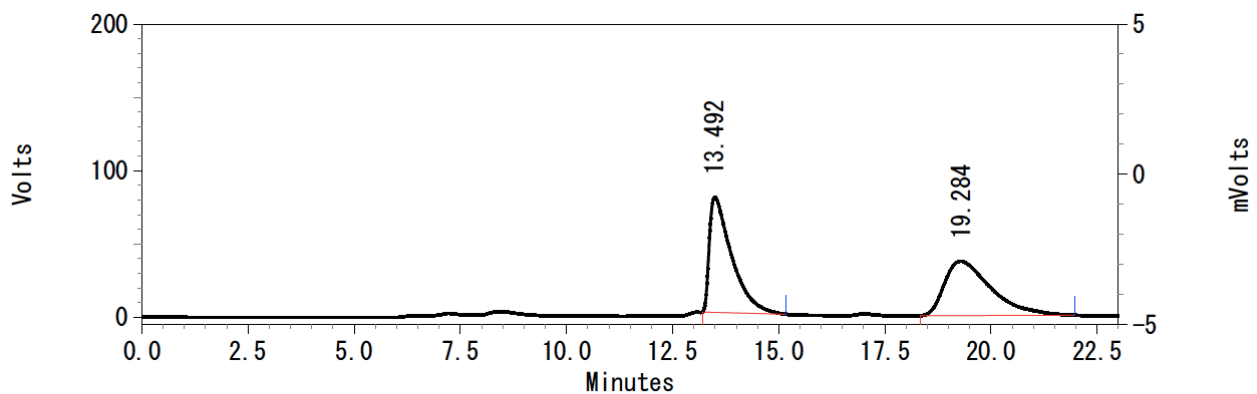

**UV Results**

| Pk # | Retention Time | Area    | Area Percent | Height |
|------|----------------|---------|--------------|--------|
| 1    | 13.492         | 2867768 | 50.333       | 78659  |
| 2    | 19.284         | 2829852 | 49.667       | 37126  |

|        |  |         |         |        |
|--------|--|---------|---------|--------|
| Totals |  | 5697620 | 100.000 | 115785 |
|--------|--|---------|---------|--------|



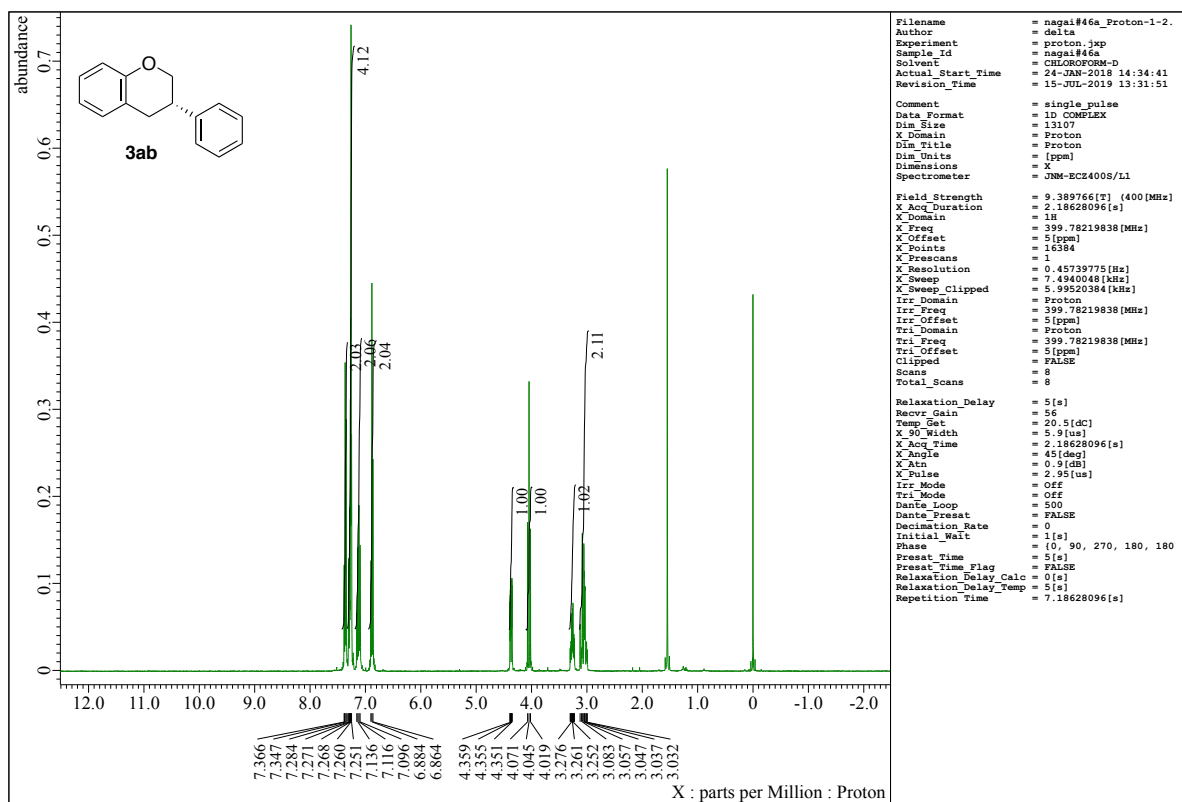

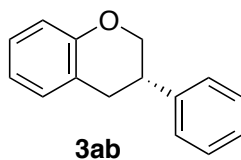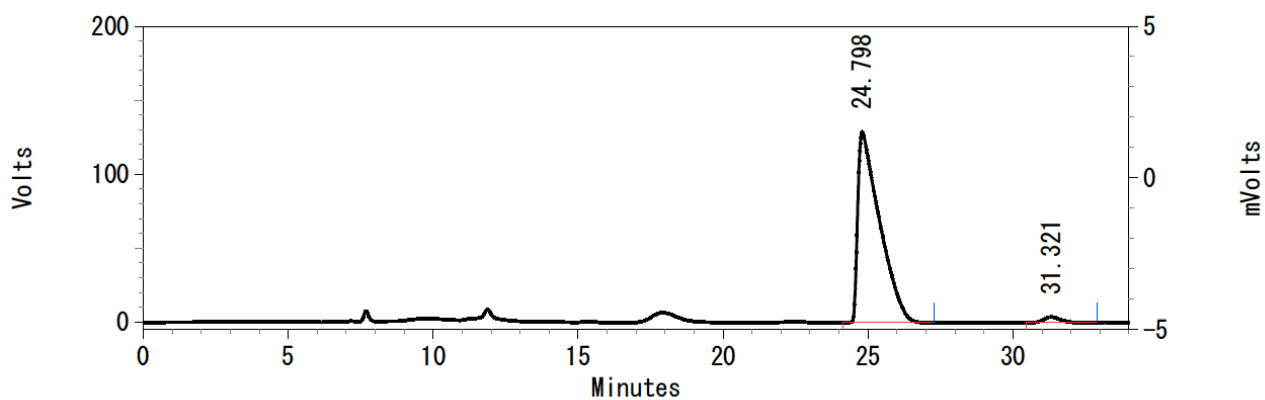

**UV-970 Results**

| Pk # | Retention Time | Area    | Area Percent | Height |
|------|----------------|---------|--------------|--------|
| 1    | 24.798         | 6737664 | 97.780       | 128970 |
| 2    | 31.321         | 152972  | 2.220        | 3811   |

|        |  |         |         |        |
|--------|--|---------|---------|--------|
| Totals |  | 6890636 | 100.000 | 132781 |
|--------|--|---------|---------|--------|

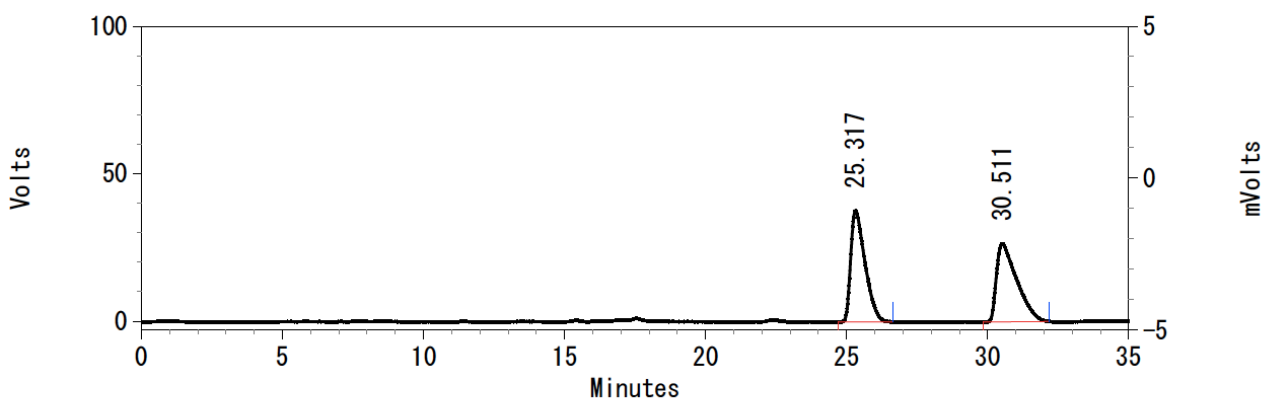

**UV-970 Results**

| Pk # | Retention Time | Area    | Area Percent | Height |
|------|----------------|---------|--------------|--------|
| 1    | 25.317         | 1328196 | 50.029       | 37752  |
| 2    | 30.511         | 1326635 | 49.971       | 26497  |

|        |  |         |         |       |
|--------|--|---------|---------|-------|
| Totals |  | 2654831 | 100.000 | 64249 |
|--------|--|---------|---------|-------|

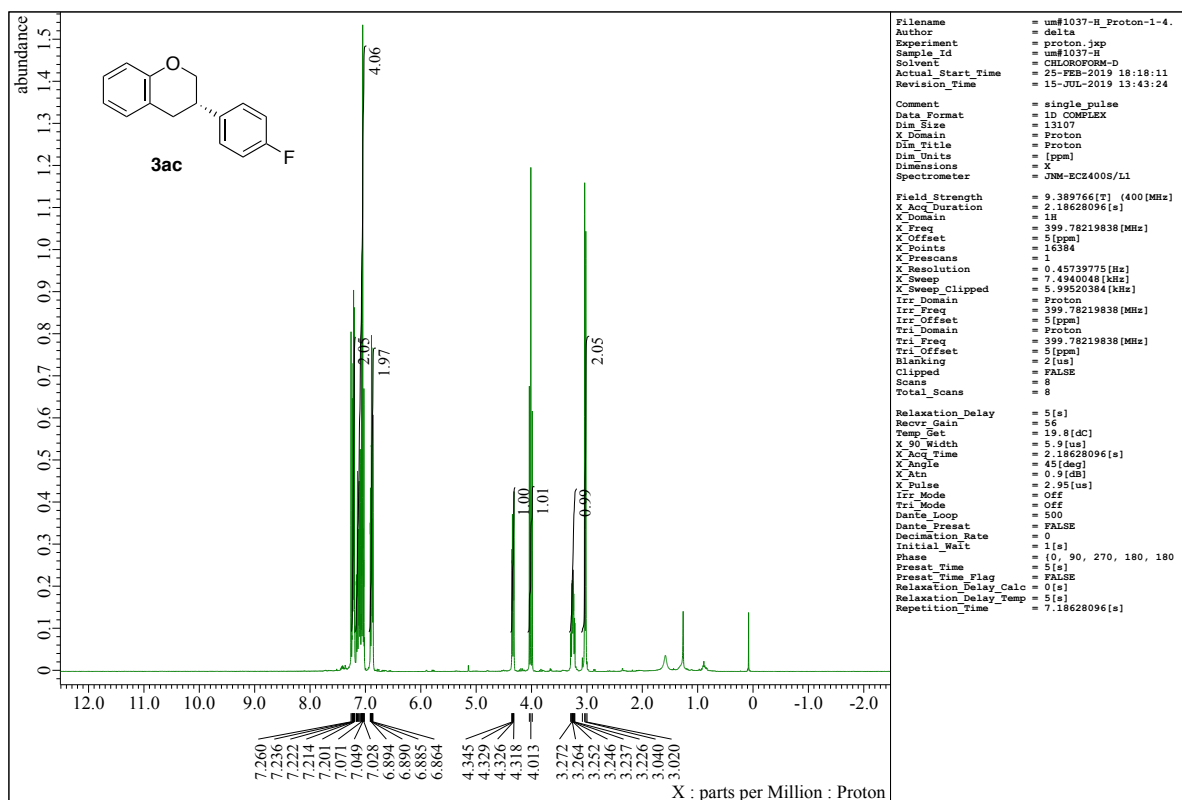

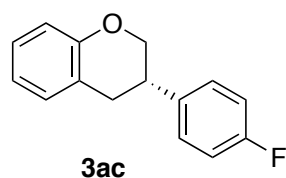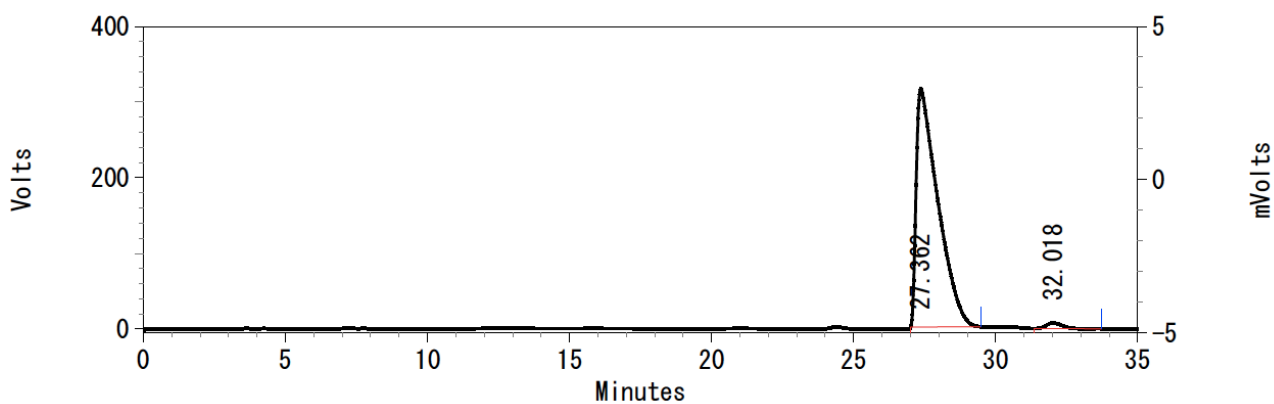

**UV-970 Results**

| Pk # | Retention Time | Area     | Area Percent | Height |
|------|----------------|----------|--------------|--------|
| 1    | 27.362         | 16637185 | 98.358       | 314753 |
| 2    | 32.018         | 277797   | 1.642        | 7393   |

|        |  |          |         |        |
|--------|--|----------|---------|--------|
| Totals |  | 16914982 | 100.000 | 322146 |
|--------|--|----------|---------|--------|

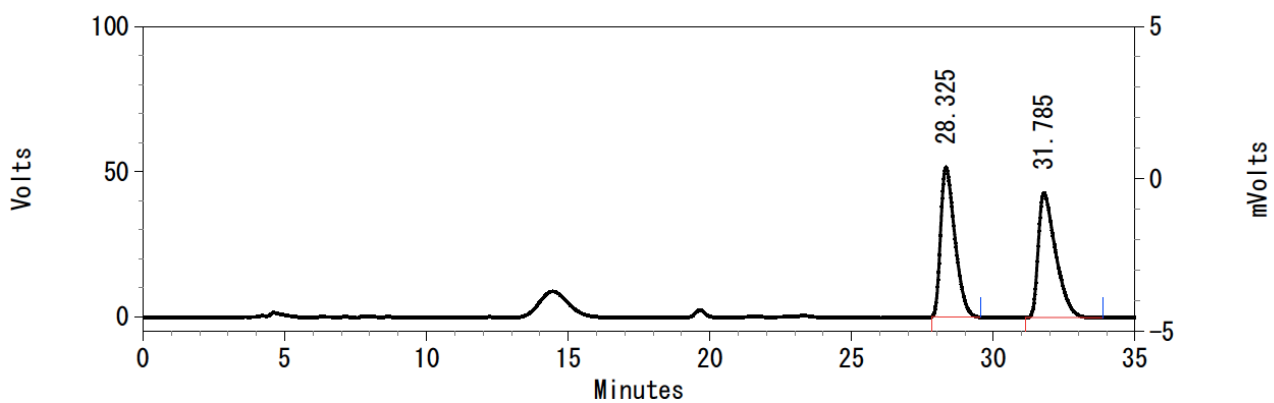

**UV-970 Results**

| Pk # | Retention Time | Area    | Area Percent | Height |
|------|----------------|---------|--------------|--------|
| 1    | 28.325         | 1800953 | 49.550       | 51527  |
| 2    | 31.785         | 1833653 | 50.450       | 42913  |

|        |  |         |         |       |
|--------|--|---------|---------|-------|
| Totals |  | 3634606 | 100.000 | 94440 |
|--------|--|---------|---------|-------|

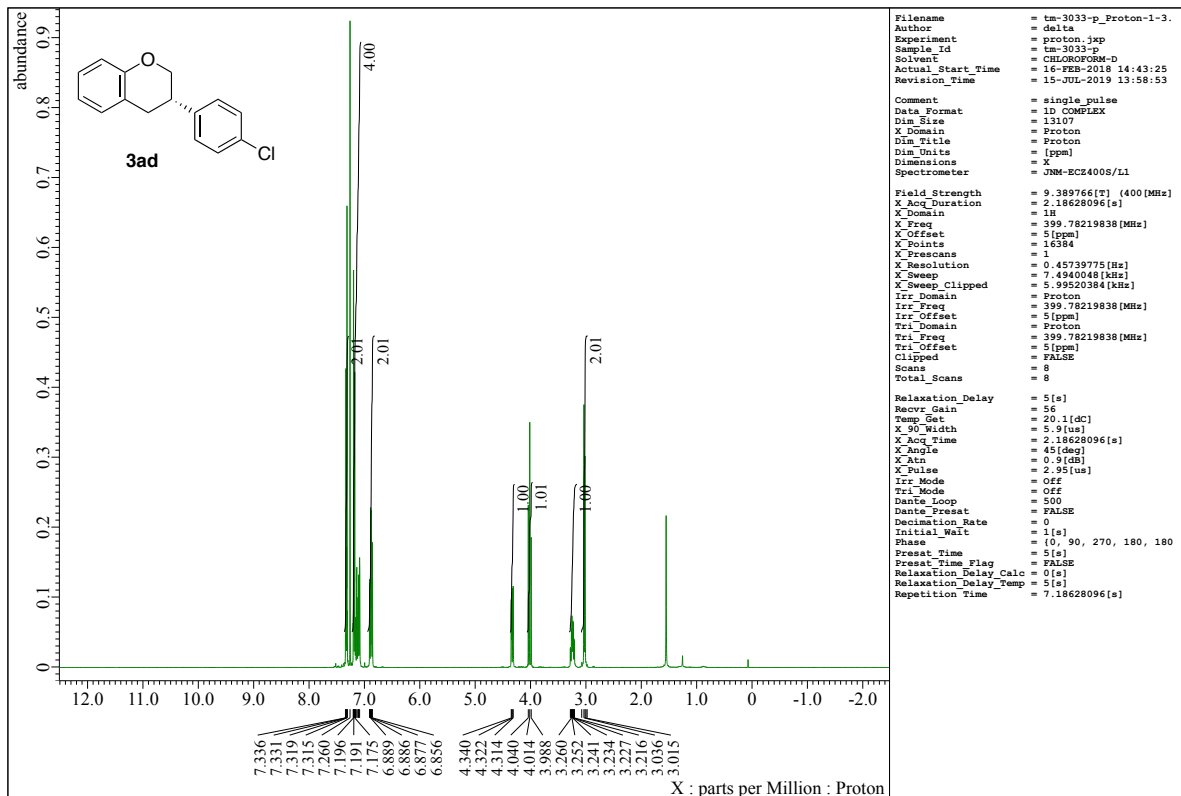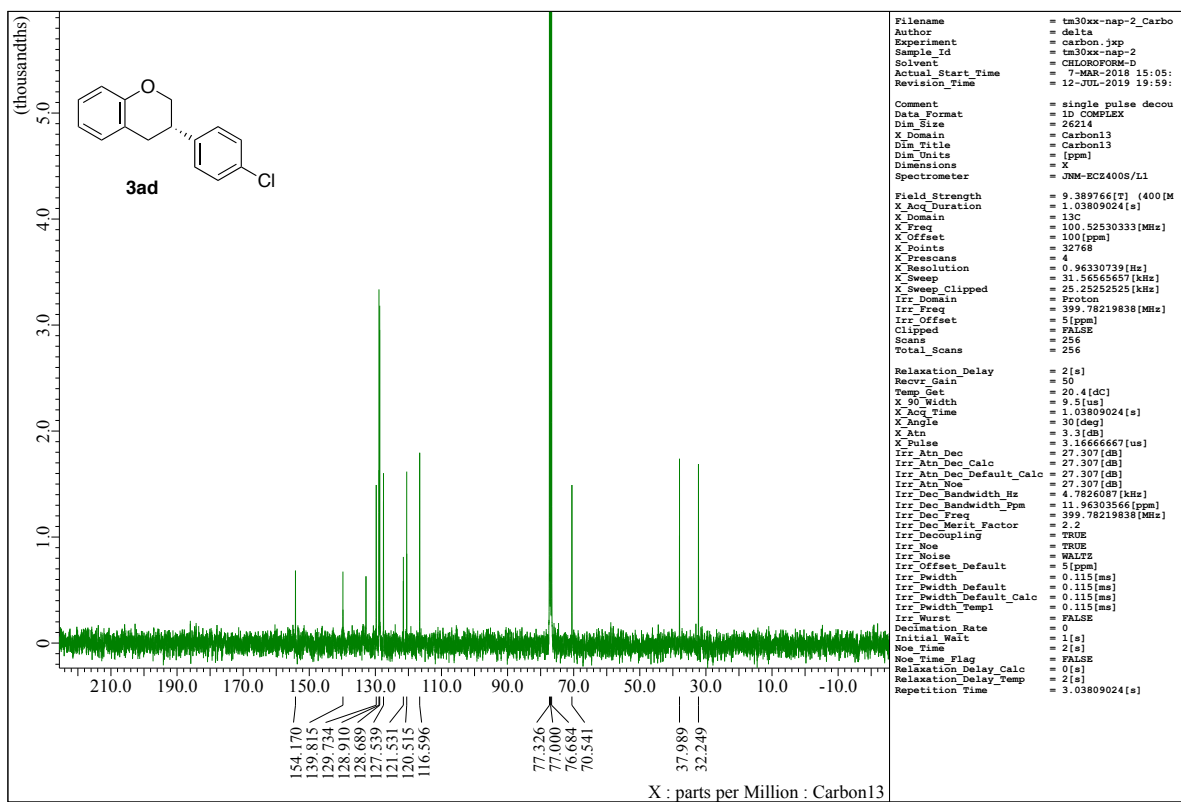

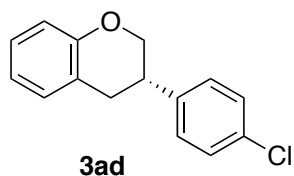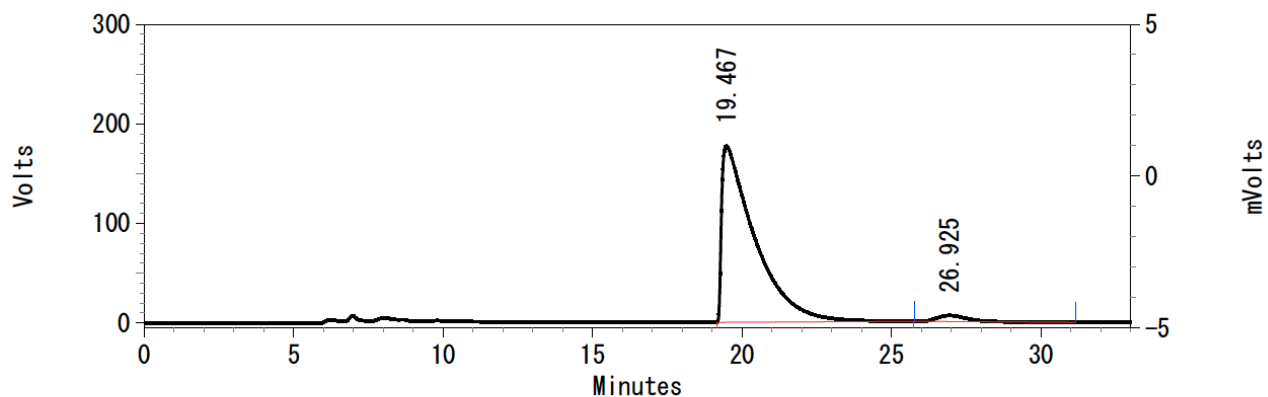

**UV-970 Results**

| Pk #   | Retention Time | Area     | Area Percent | Height |
|--------|----------------|----------|--------------|--------|
| 1      | 19.467         | 13670263 | 96.984       | 176900 |
| 2      | 26.925         | 425082   | 3.016        | 6112   |
| Totals |                | 14095345 | 100.000      | 183012 |

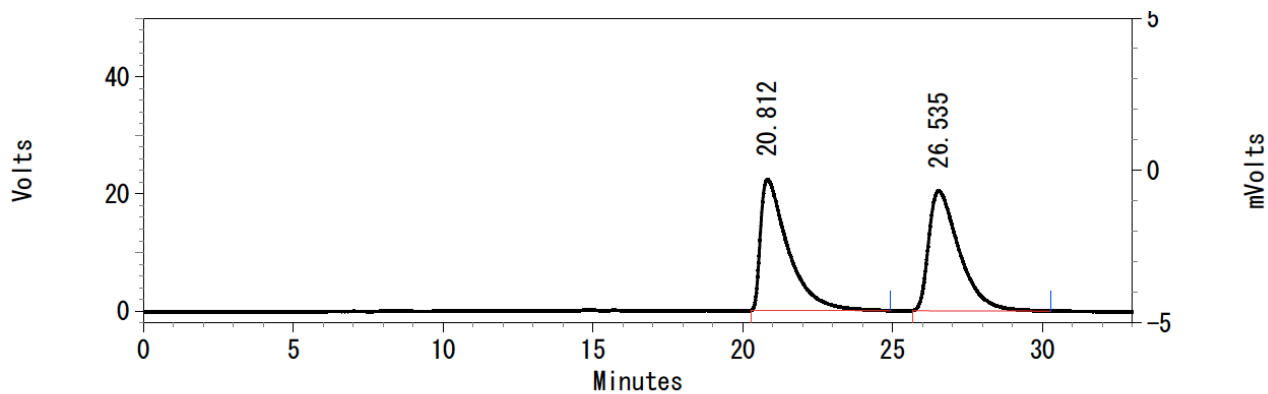

**UV-970 Results**

| Pk #   | Retention Time | Area    | Area Percent | Height |
|--------|----------------|---------|--------------|--------|
| 1      | 20.812         | 1434540 | 49.710       | 22364  |
| 2      | 26.535         | 1451271 | 50.290       | 20456  |
| Totals |                | 2885811 | 100.000      | 42820  |

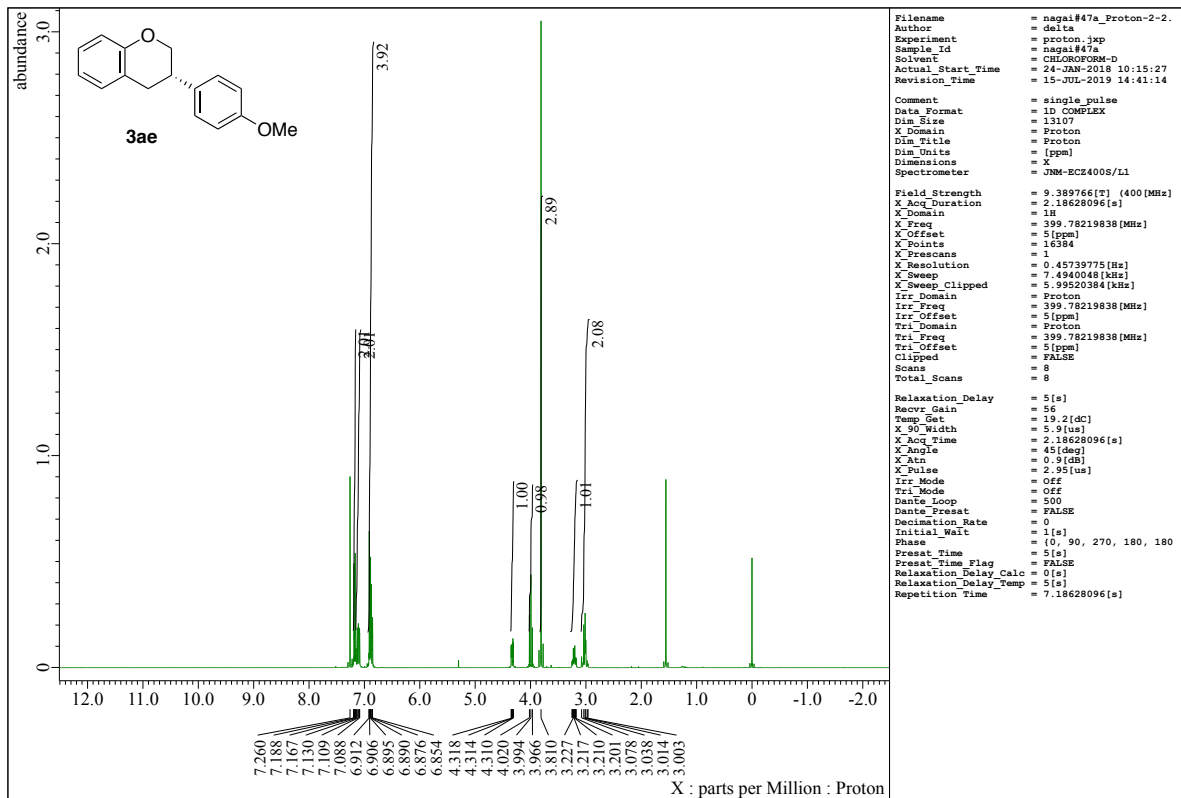

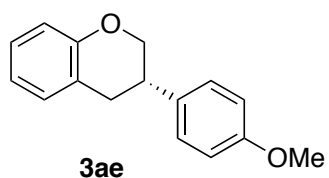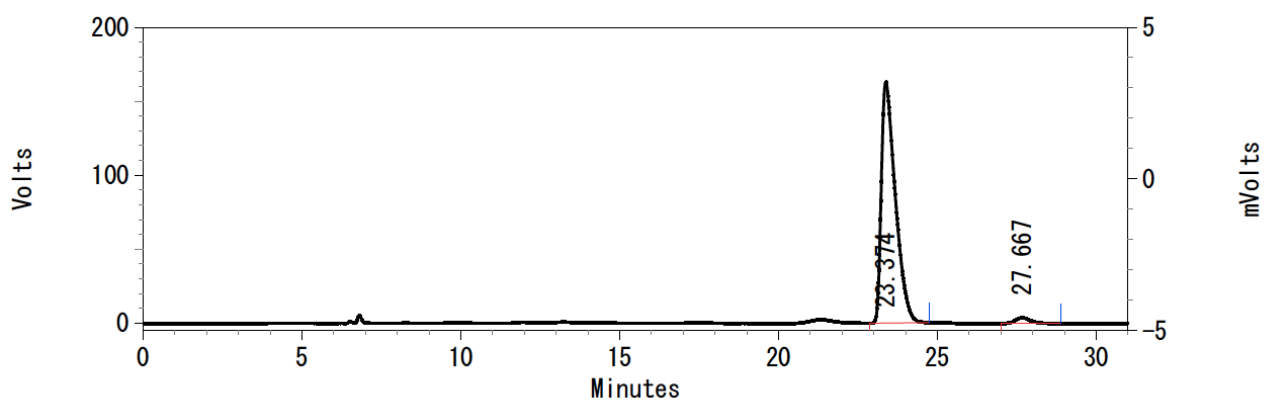

**UV-970 Results**

| Pk # | Retention Time | Area    | Area Percent | Height |
|------|----------------|---------|--------------|--------|
| 1    | 23.374         | 4993928 | 97.550       | 163030 |
| 2    | 27.667         | 125405  | 2.450        | 3855   |

|        |  |         |         |        |
|--------|--|---------|---------|--------|
| Totals |  | 5119333 | 100.000 | 166885 |
|--------|--|---------|---------|--------|

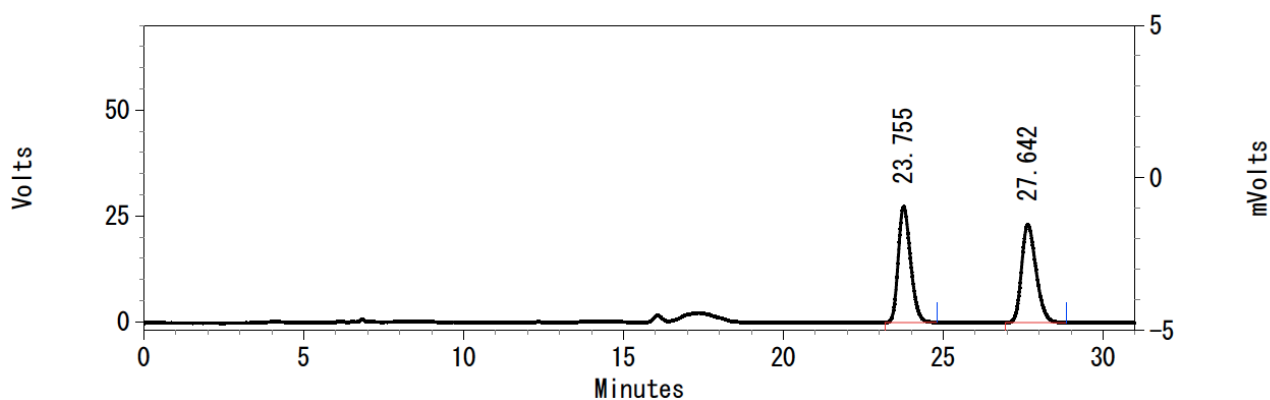

**UV-970 Results**

| Pk # | Retention Time | Area   | Area Percent | Height |
|------|----------------|--------|--------------|--------|
| 1    | 23.755         | 730655 | 50.095       | 27362  |
| 2    | 27.642         | 727896 | 49.905       | 23158  |

|        |  |         |         |       |
|--------|--|---------|---------|-------|
| Totals |  | 1458551 | 100.000 | 50520 |
|--------|--|---------|---------|-------|



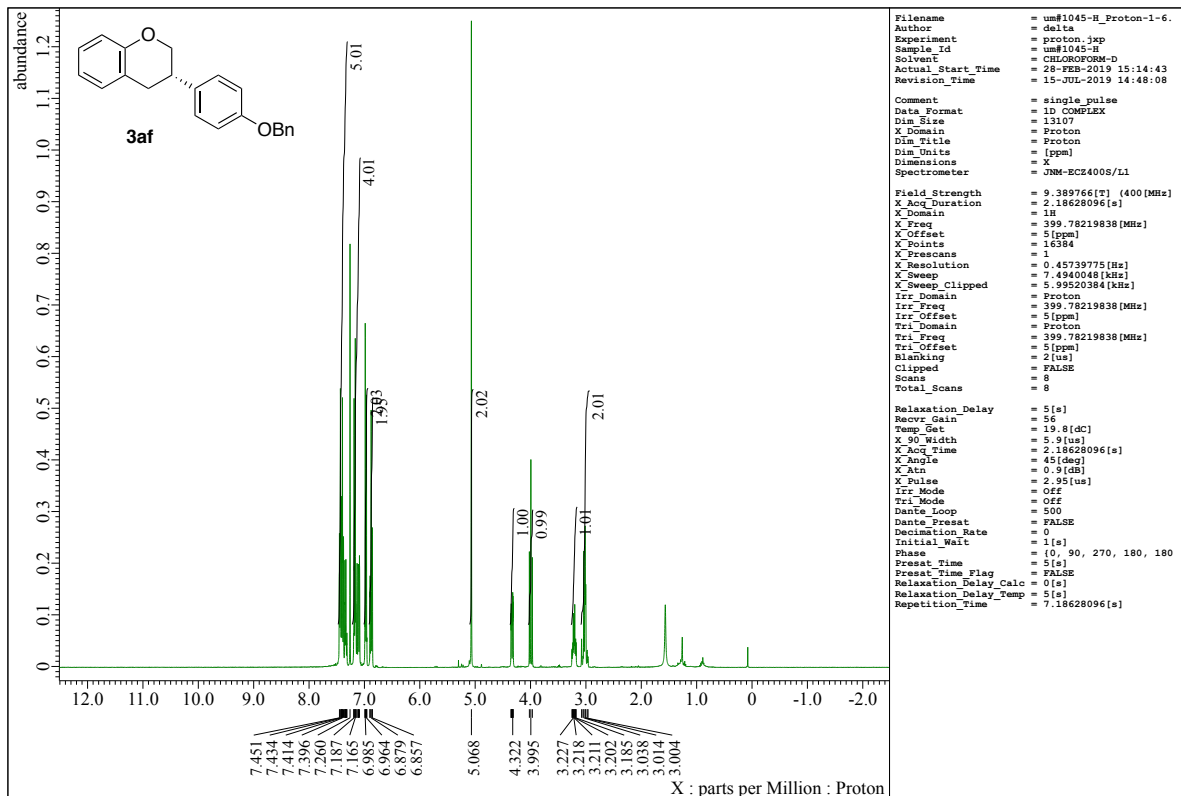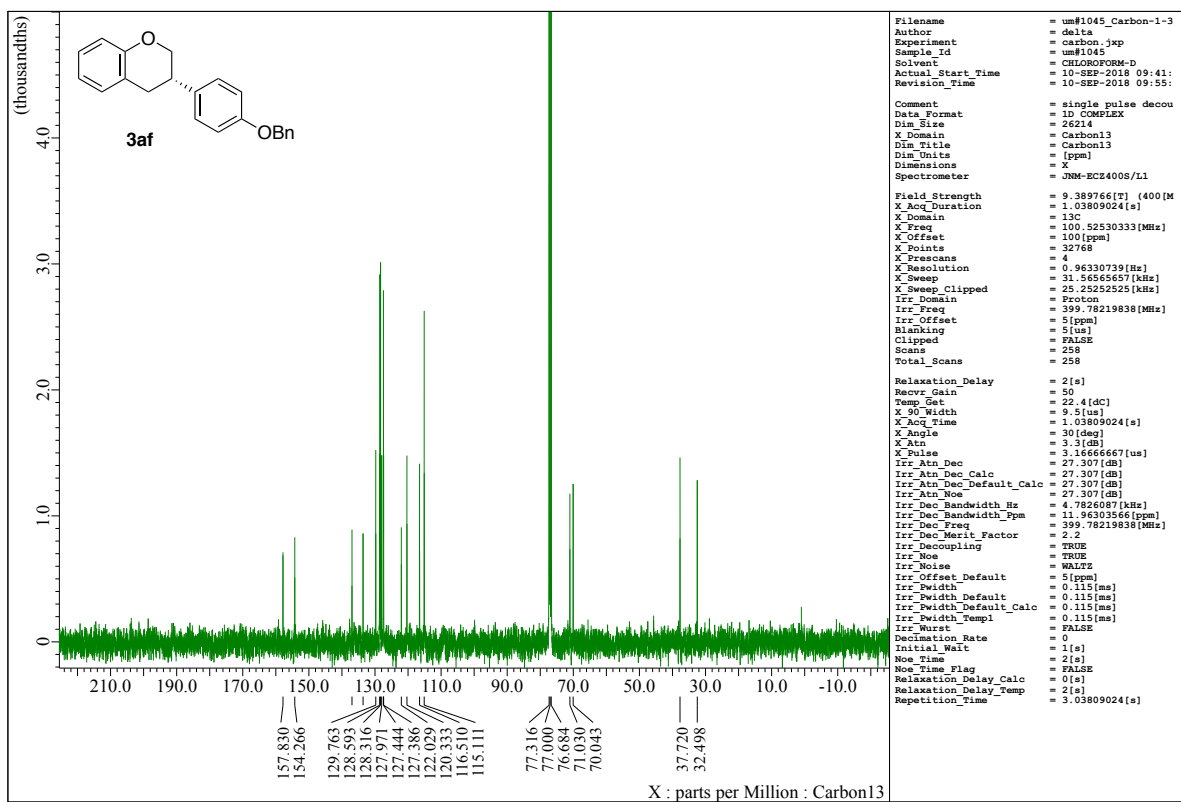

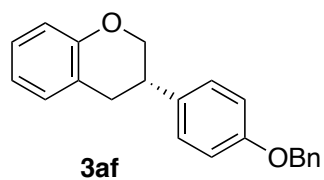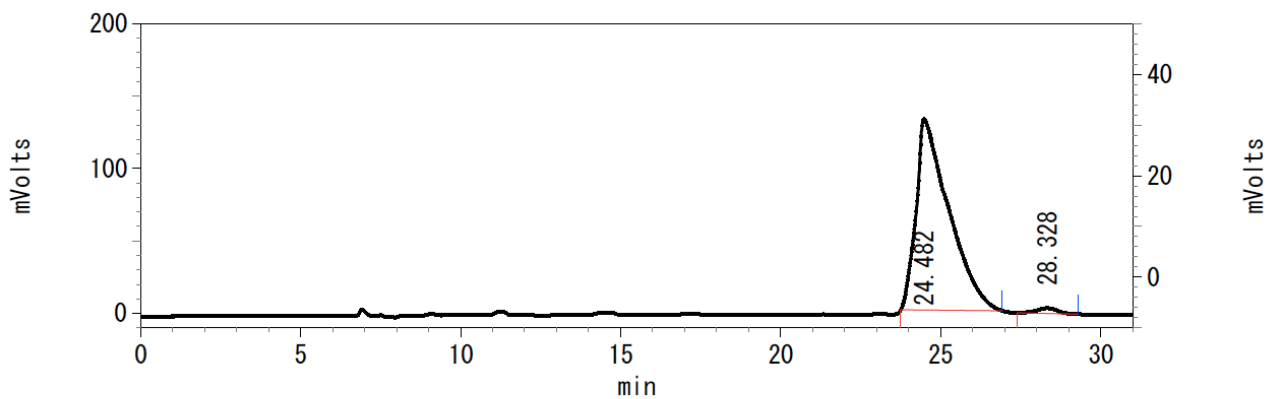

| Pk # | Retention Time | Area    | Area Percent |
|------|----------------|---------|--------------|
| 1    | 24.482         | 9417697 | 98.272       |
| 2    | 28.328         | 165570  | 1.728        |

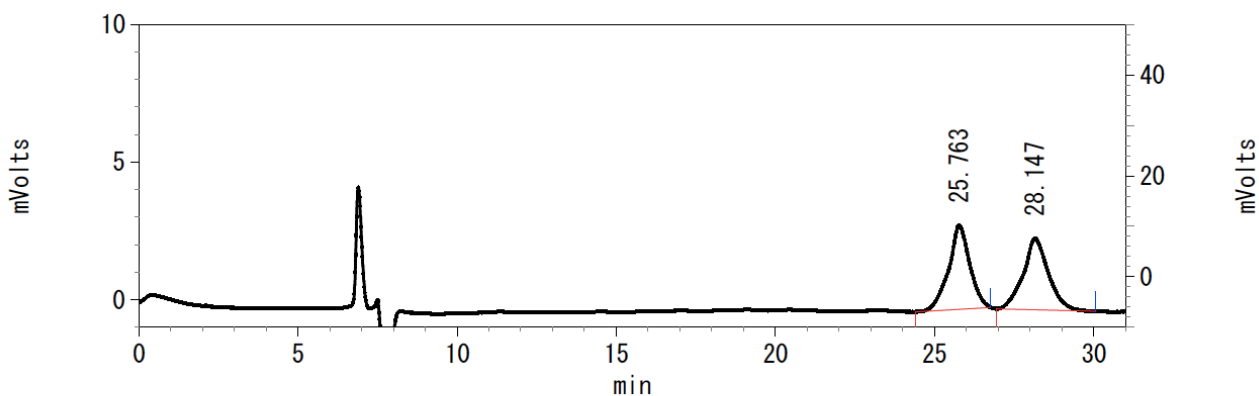

| Pk # | Retention Time | Area   | Area Percent |
|------|----------------|--------|--------------|
| 1    | 25.763         | 141088 | 49.644       |
| 2    | 28.147         | 143111 | 50.356       |

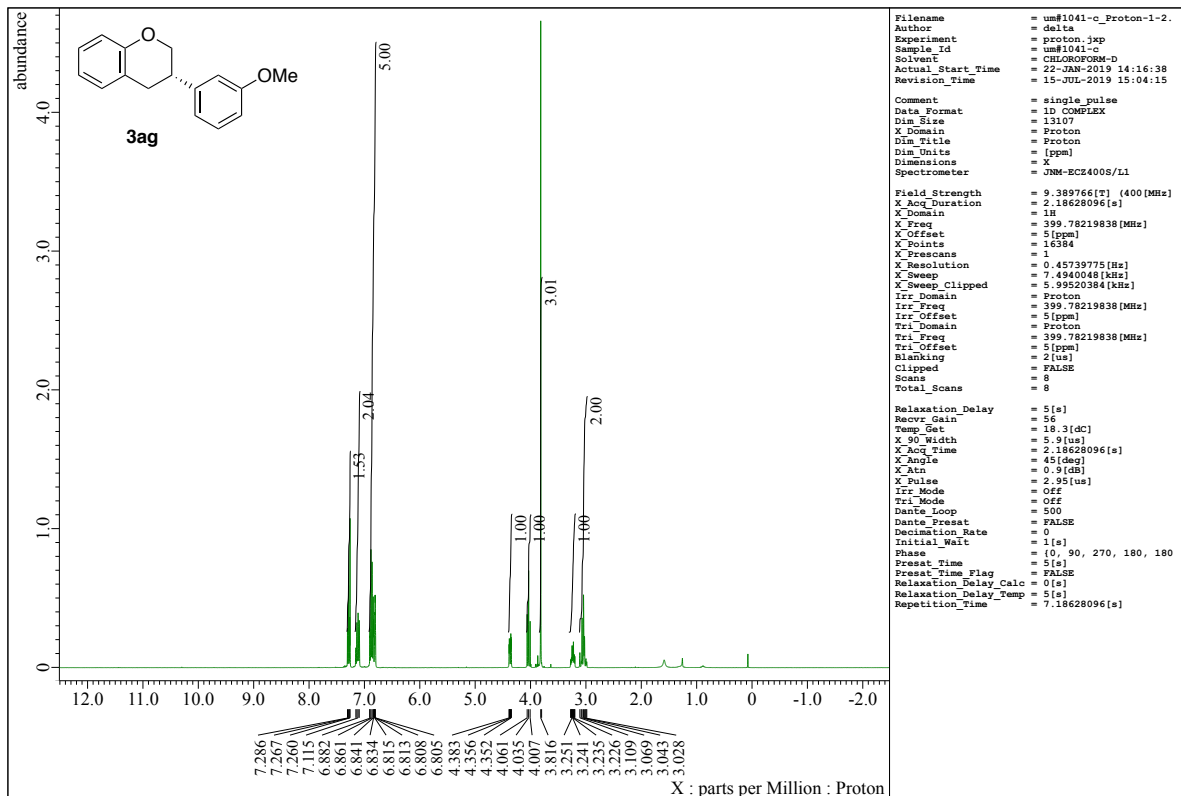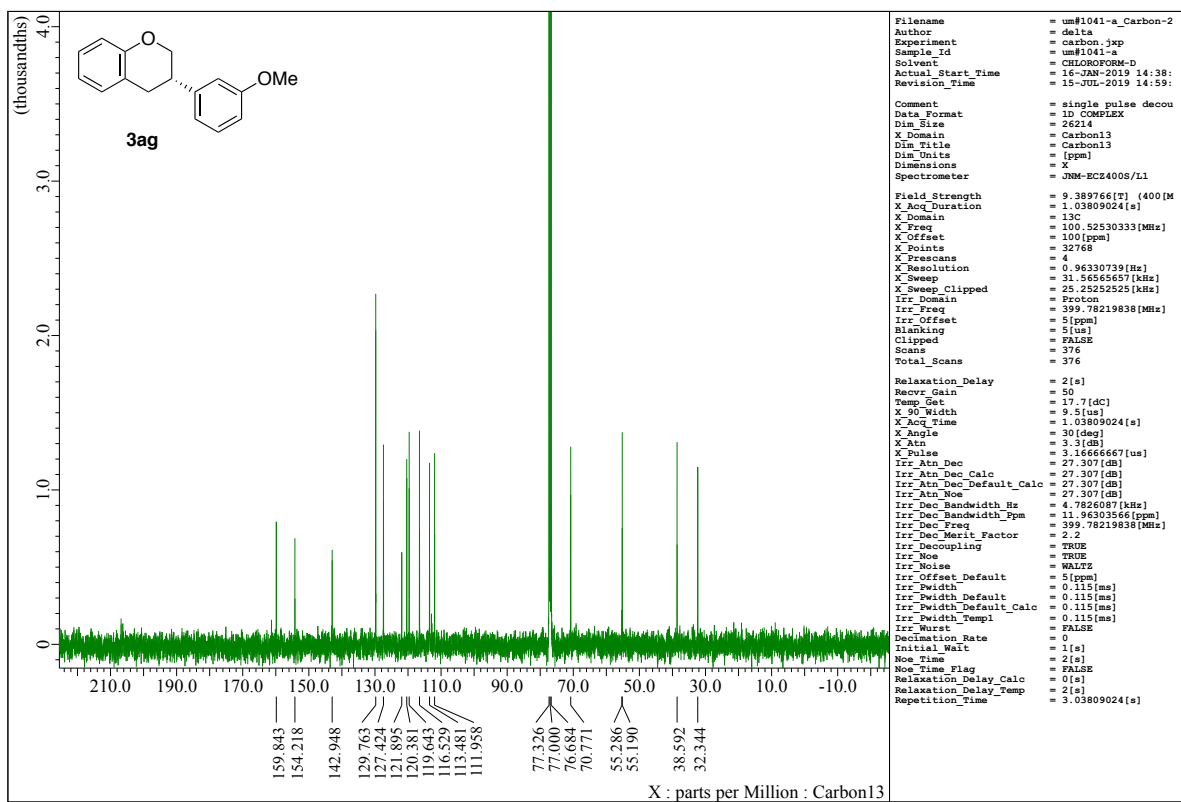

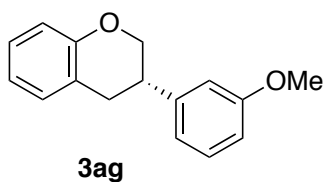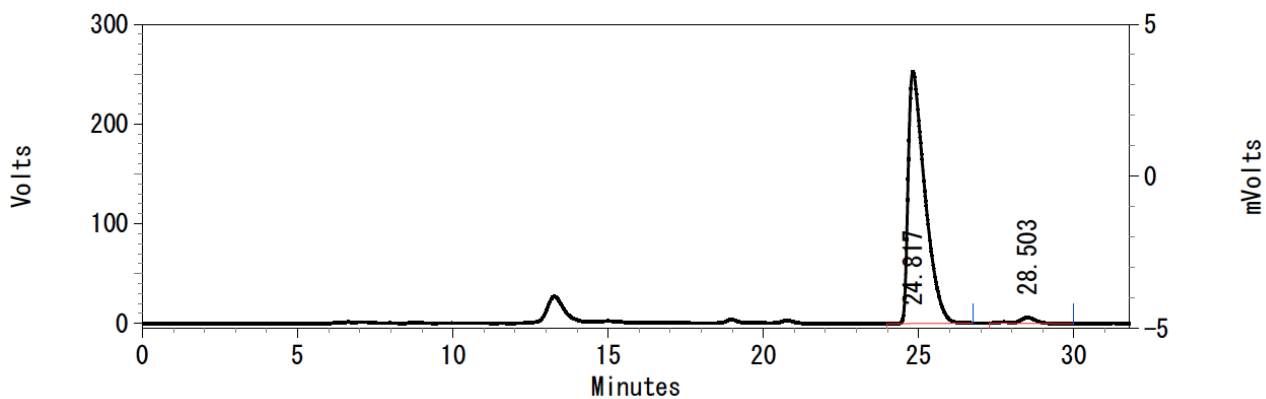

**UV Results**

| Pk #   | Retention Time | Area    | Area Percent | Height |
|--------|----------------|---------|--------------|--------|
| 1      | 24.817         | 9447422 | 97.661       | 252872 |
| 2      | 28.503         | 226295  | 2.339        | 6008   |
| Totals |                | 9673717 | 100.000      | 258880 |

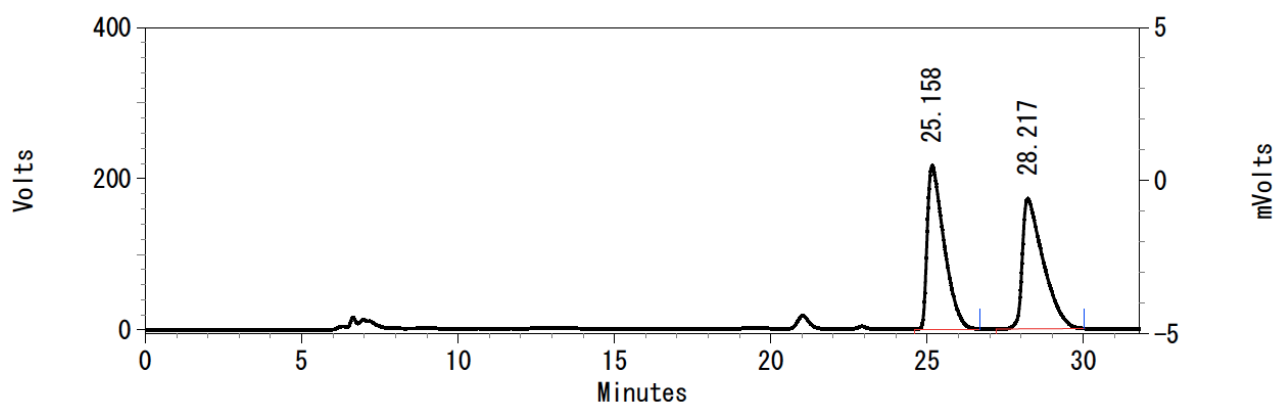

**UV Results**

| Pk #   | Retention Time | Area     | Area Percent | Height |
|--------|----------------|----------|--------------|--------|
| 1      | 25.158         | 8057865  | 50.246       | 215767 |
| 2      | 28.217         | 7979063  | 49.754       | 172355 |
| Totals |                | 16036928 | 100.000      | 388122 |

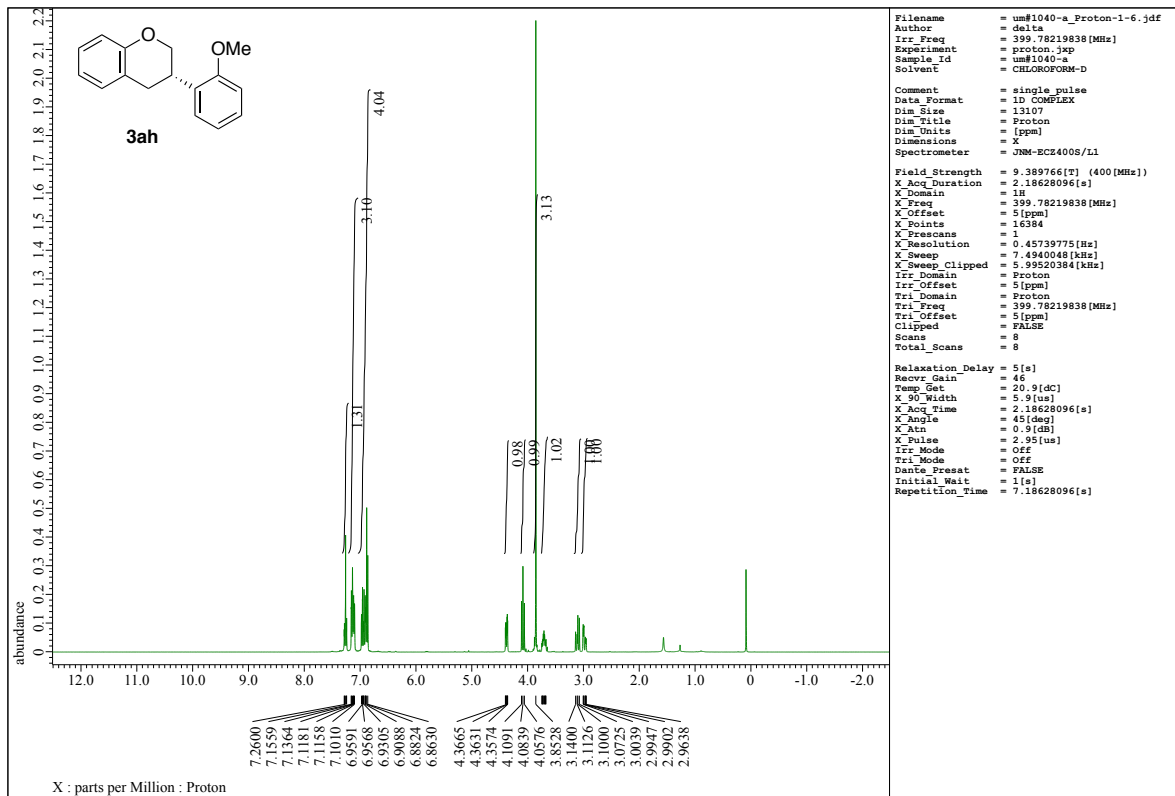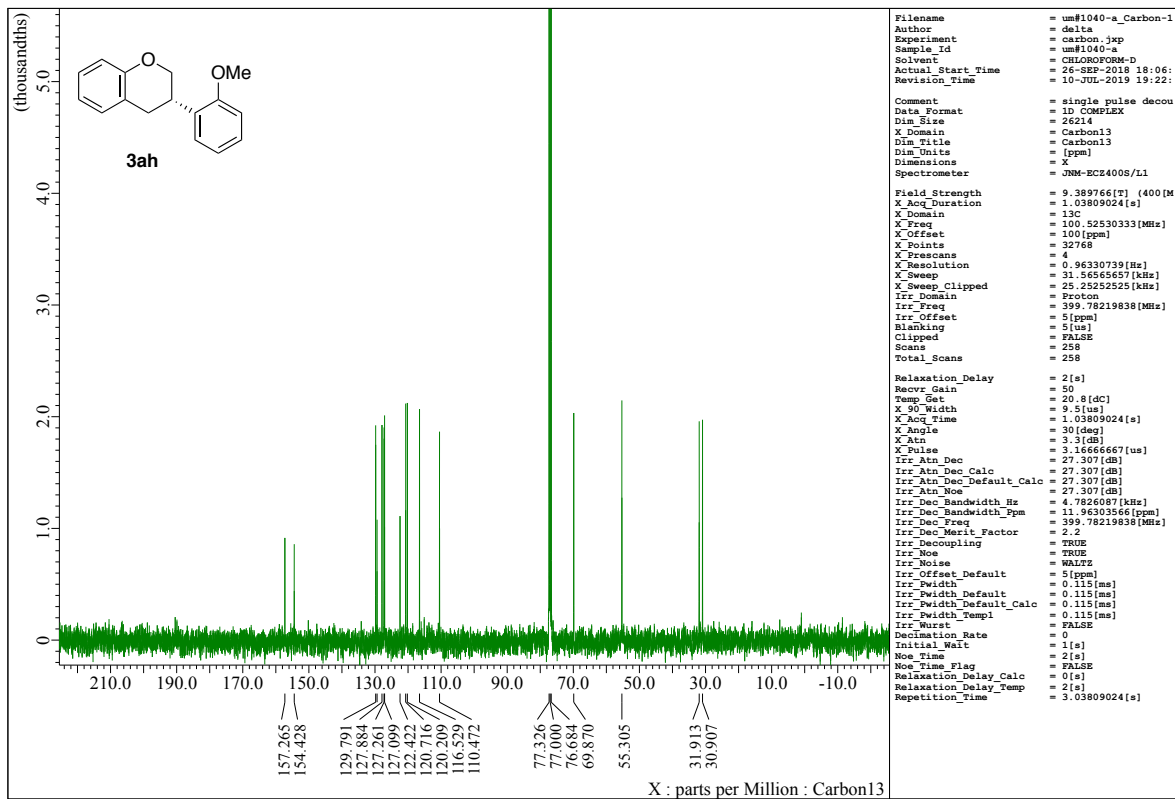

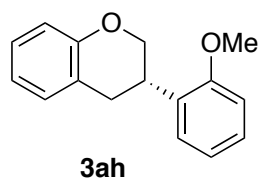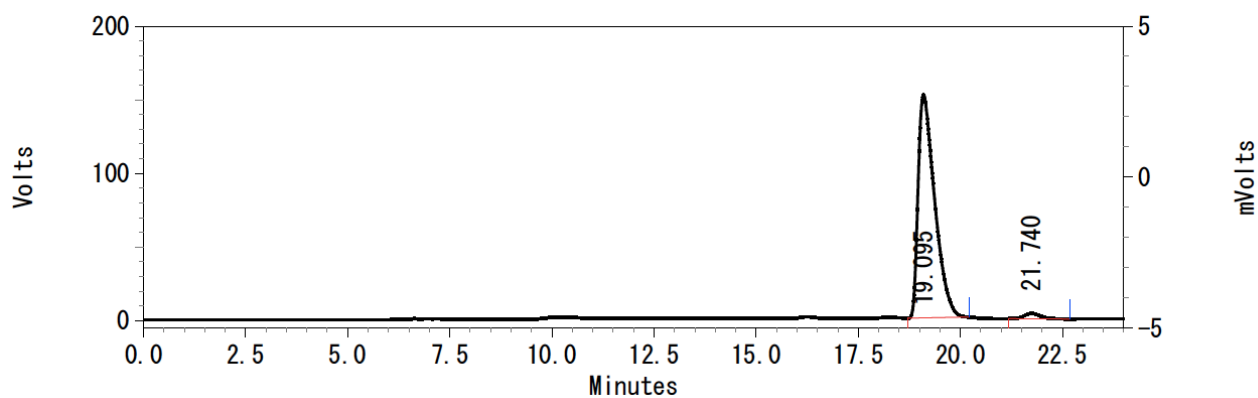

**UV Results**

| Pk #   | Retention Time | Area    | Area Percent | Height |
|--------|----------------|---------|--------------|--------|
| 1      | 19.095         | 4267293 | 97.700       | 151298 |
| 2      | 21.740         | 100465  | 2.300        | 3683   |
| Totals |                | 4367758 | 100.000      | 154981 |

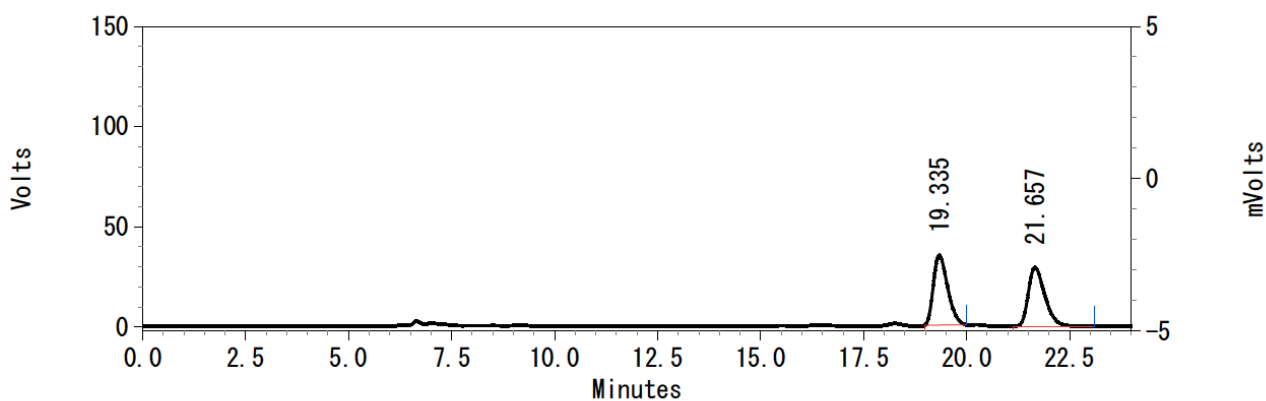

**UV Results**

| Pk #   | Retention Time | Area    | Area Percent | Height |
|--------|----------------|---------|--------------|--------|
| 1      | 19.335         | 835101  | 50.409       | 34813  |
| 2      | 21.657         | 821534  | 49.591       | 29431  |
| Totals |                | 1656635 | 100.000      | 64244  |

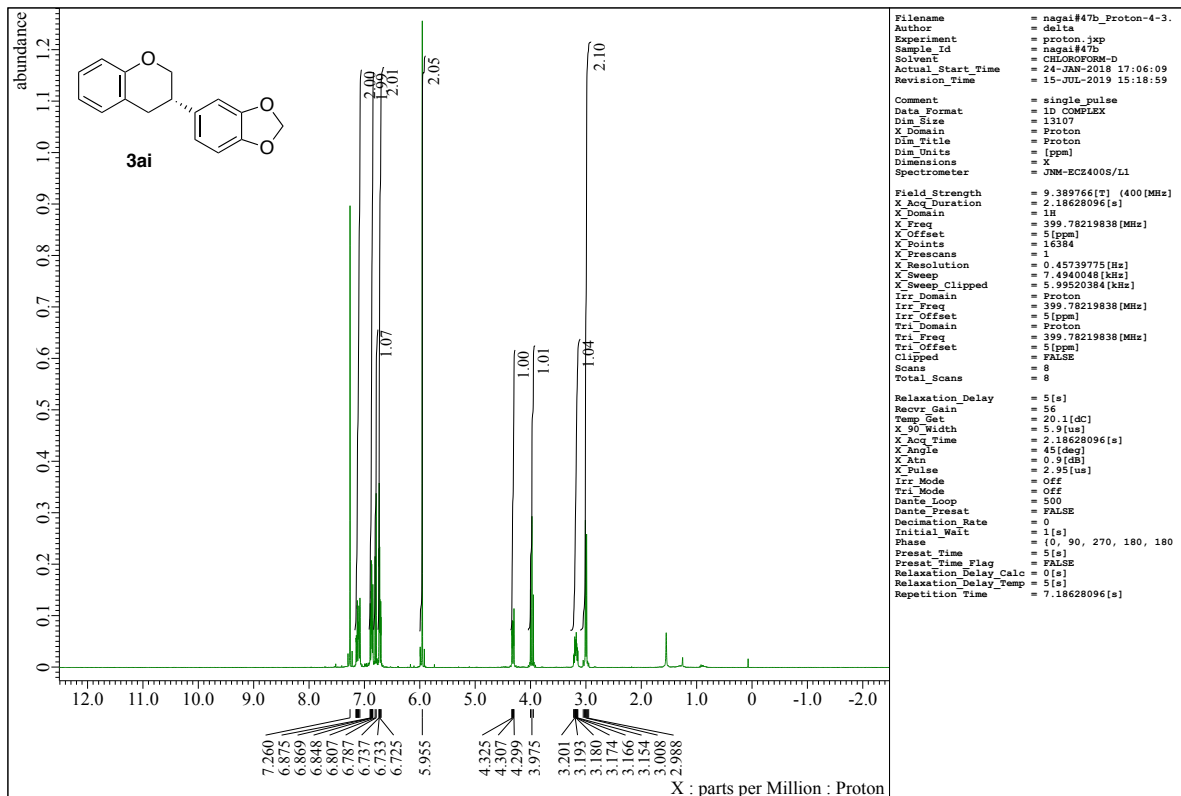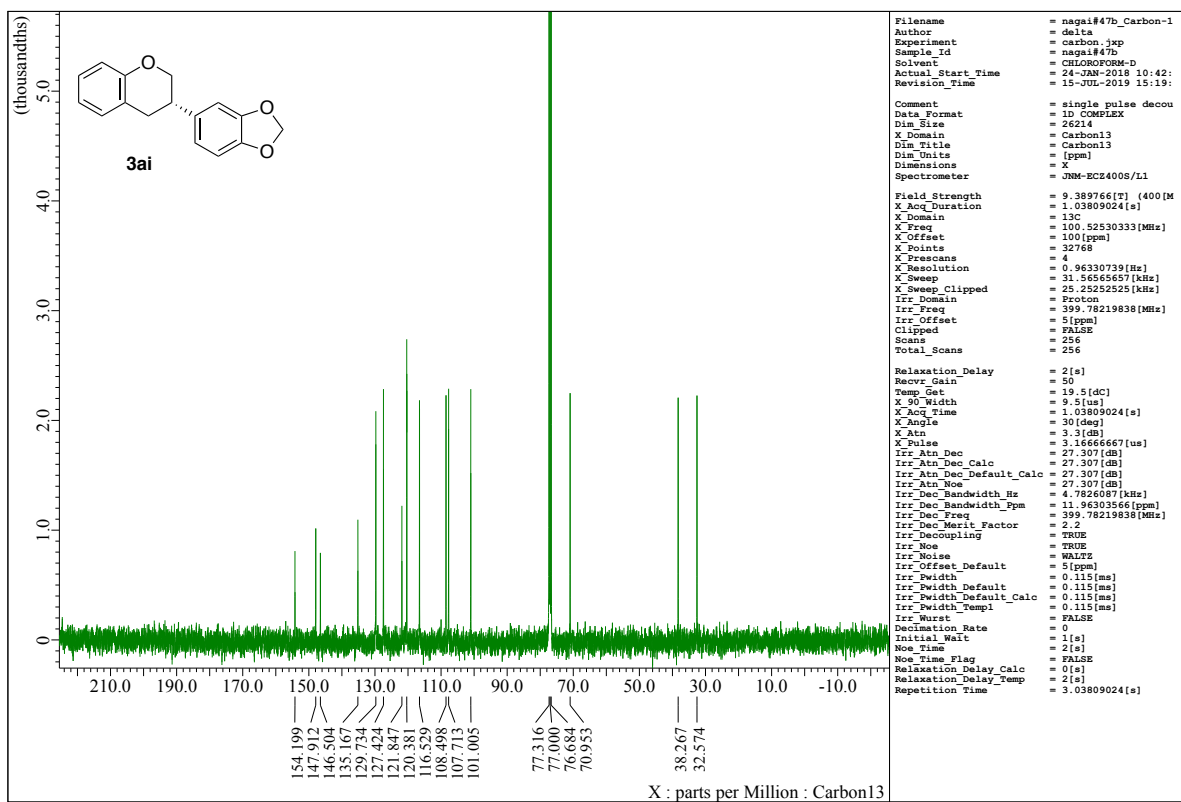

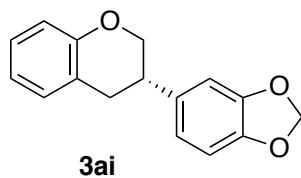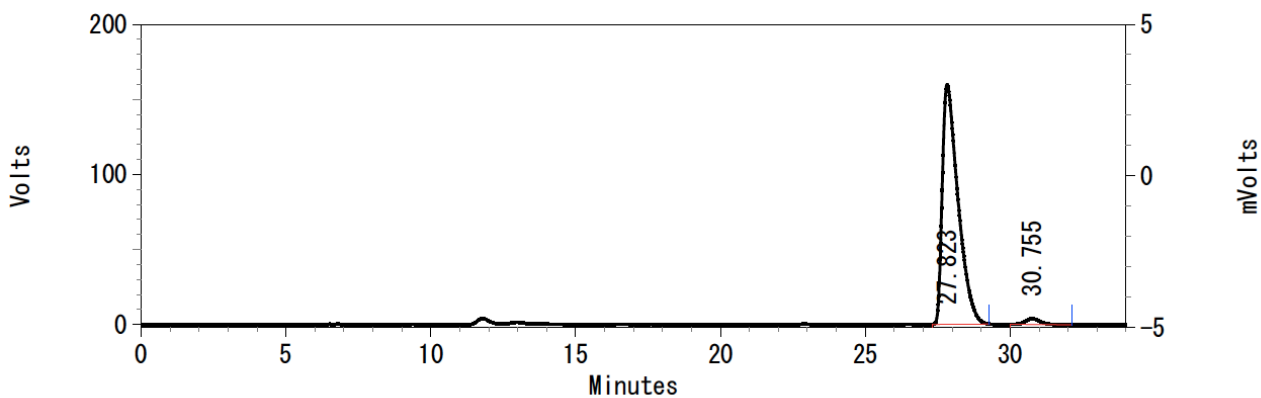

**UV-970 Results**

| Pk # | Retention Time | Area    | Area Percent | Height |
|------|----------------|---------|--------------|--------|
| 1    | 27.823         | 6036061 | 97.807       | 160003 |
| 2    | 30.755         | 135314  | 2.193        | 3776   |

|        |  |         |         |        |
|--------|--|---------|---------|--------|
| Totals |  | 6171375 | 100.000 | 163779 |
|--------|--|---------|---------|--------|

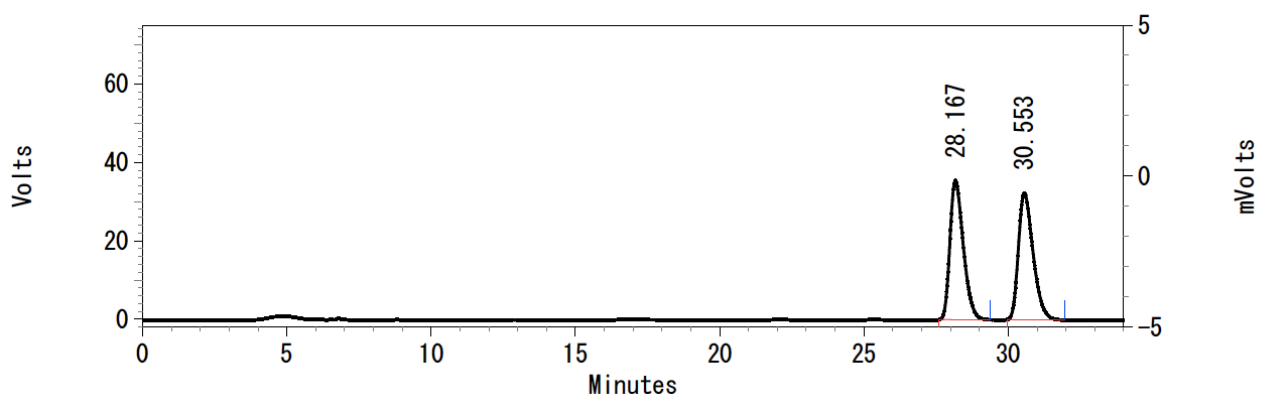

**UV-970 Results**

| Pk # | Retention Time | Area    | Area Percent | Height |
|------|----------------|---------|--------------|--------|
| 1    | 28.167         | 1145715 | 50.045       | 35485  |
| 2    | 30.553         | 1143657 | 49.955       | 32333  |

|        |  |         |         |       |
|--------|--|---------|---------|-------|
| Totals |  | 2289372 | 100.000 | 67818 |
|--------|--|---------|---------|-------|



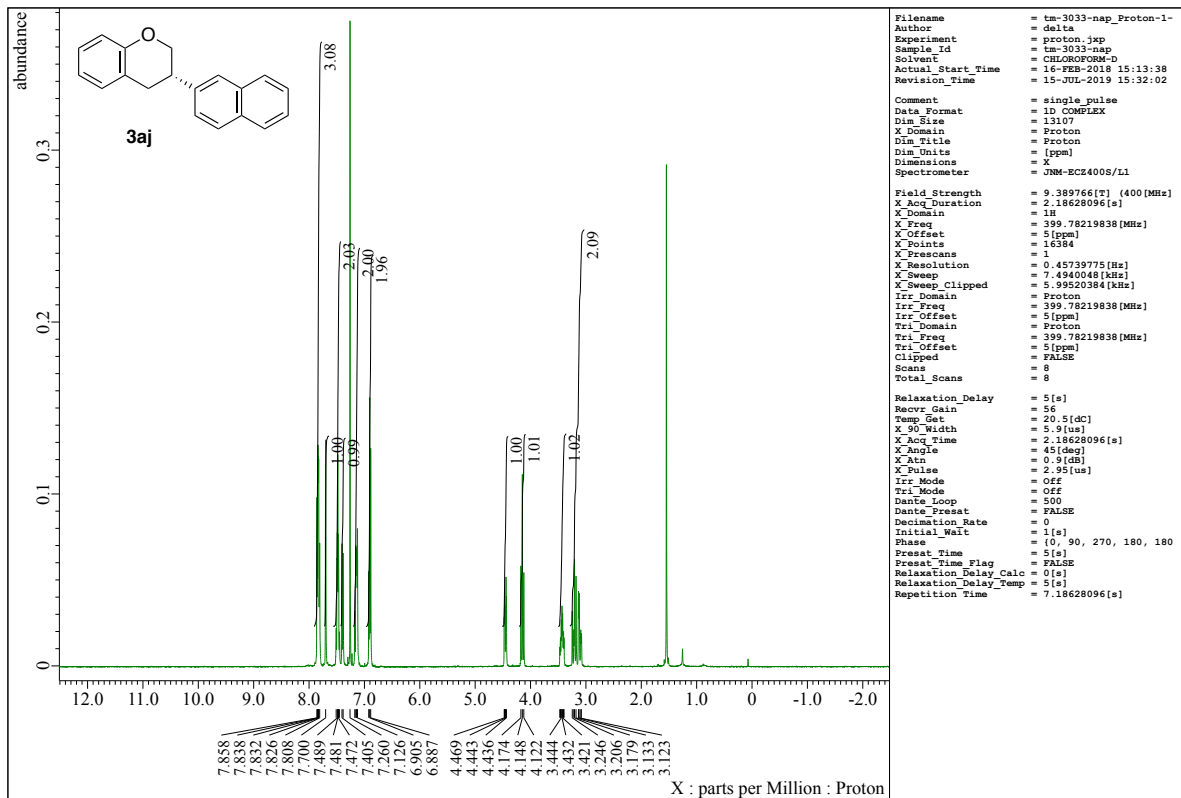

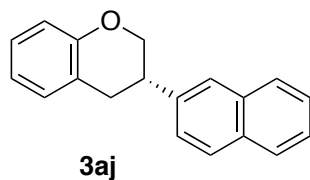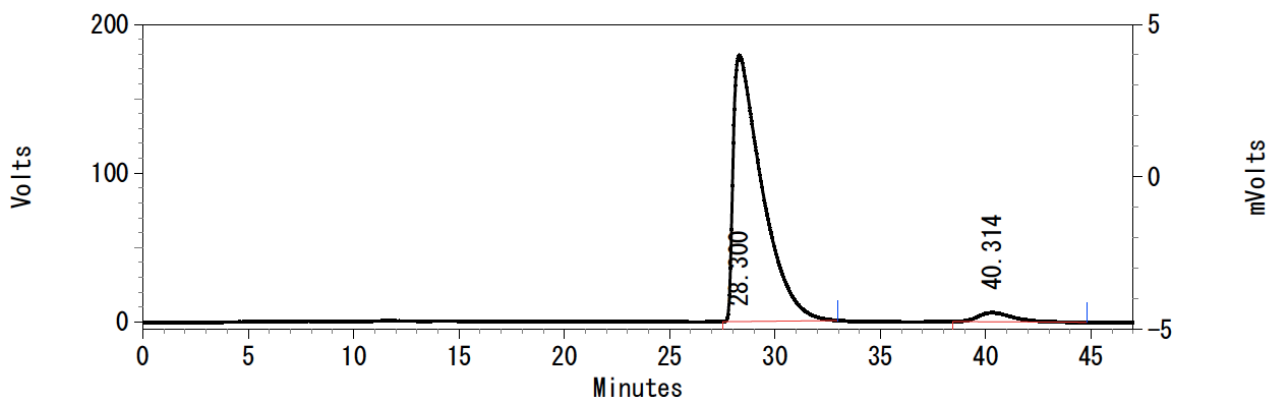

**UV-970 Results**

| Pk #   | Retention Time | Area     | Area Percent | Height |
|--------|----------------|----------|--------------|--------|
| 1      | 28.300         | 17032748 | 96.092       | 178967 |
| 2      | 40.314         | 692794   | 3.908        | 6083   |
| Totals |                | 17725542 | 100.000      | 185050 |

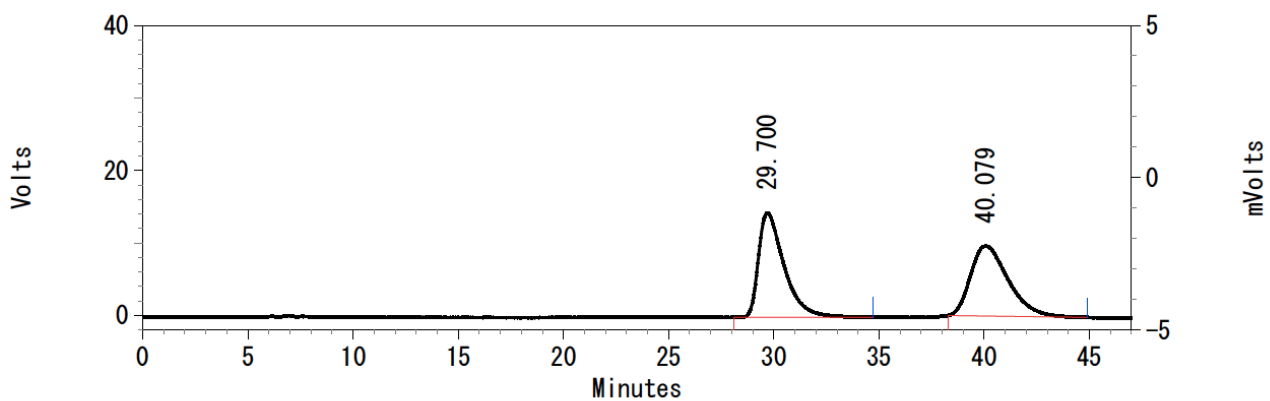

**UV-970 Results**

| Pk #   | Retention Time | Area    | Area Percent | Height |
|--------|----------------|---------|--------------|--------|
| 1      | 29.700         | 1215561 | 50.259       | 14389  |
| 2      | 40.079         | 1203034 | 49.741       | 9656   |
| Totals |                | 2418595 | 100.000      | 24045  |

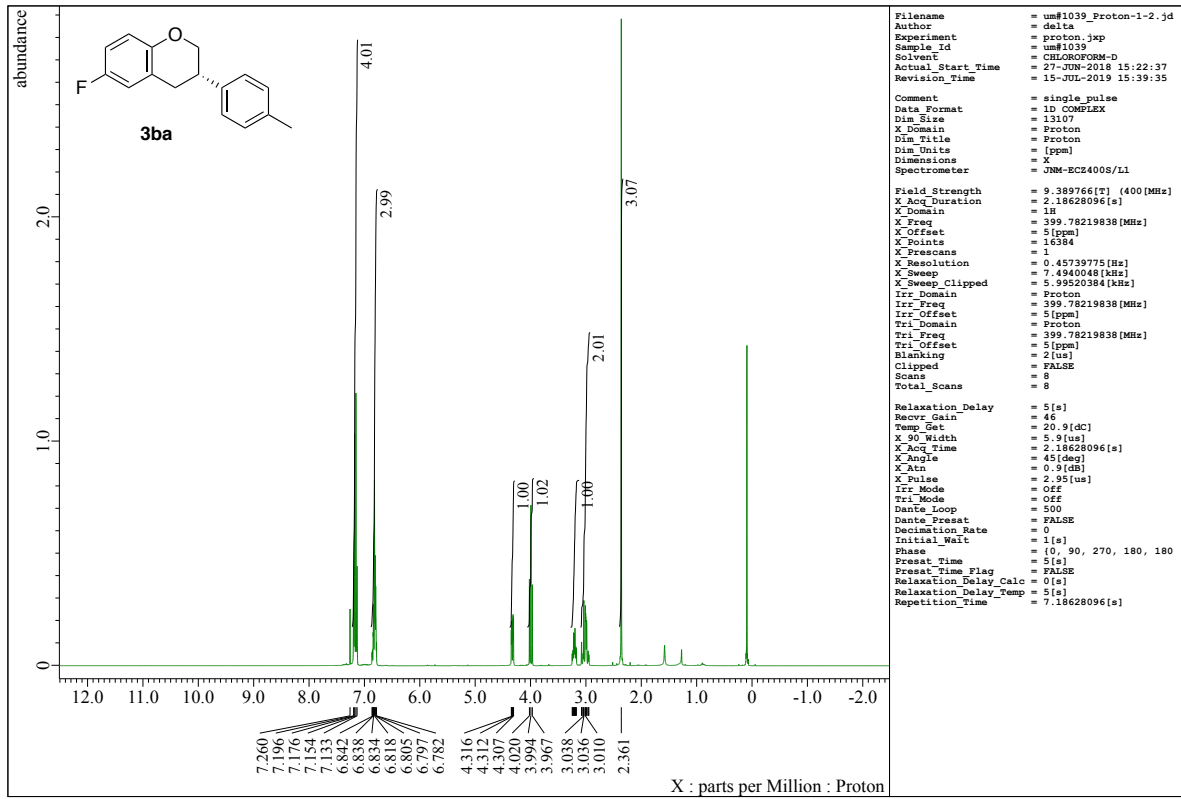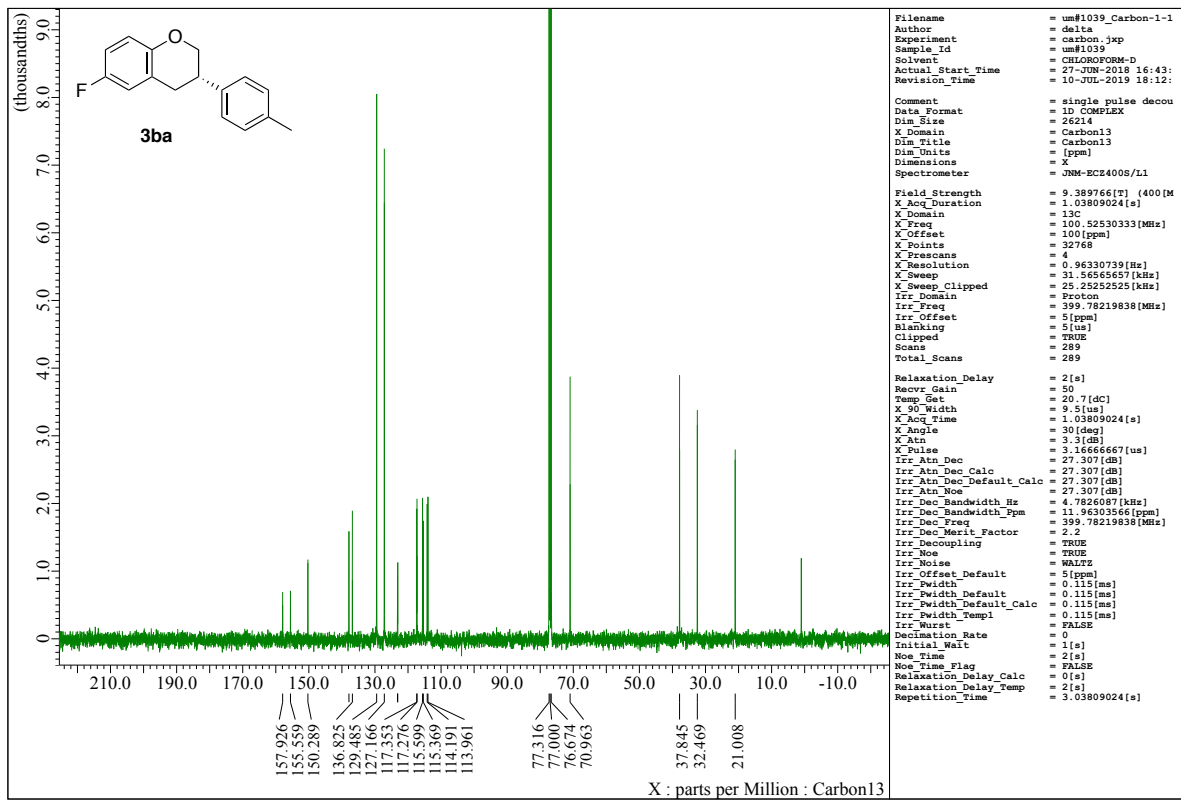

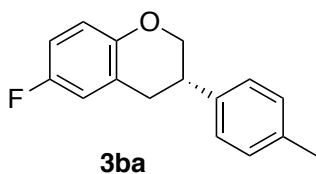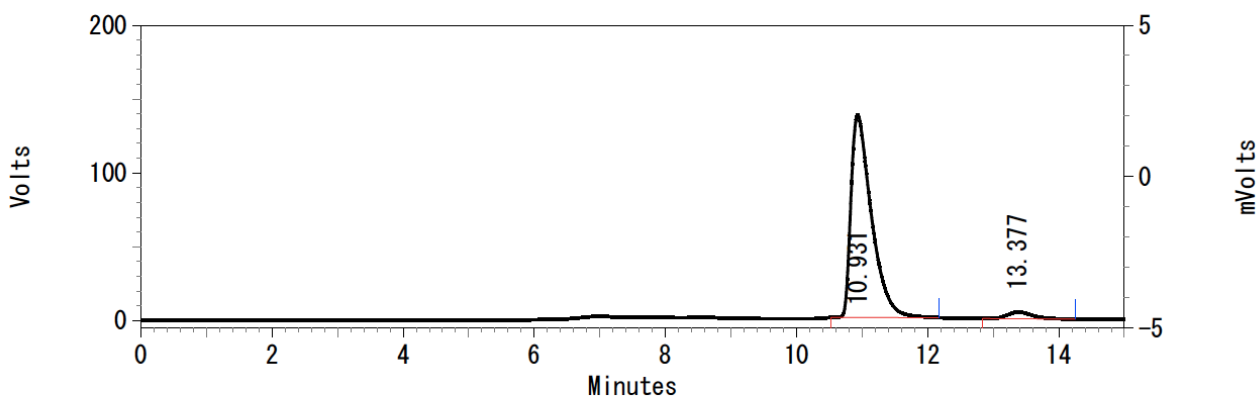

**UV Results**

| Pk # | Retention Time | Area    | Area Percent | Height |
|------|----------------|---------|--------------|--------|
| 1    | 10.931         | 2978296 | 96.185       | 137043 |
| 2    | 13.377         | 118144  | 3.815        | 4468   |

|        |  |         |         |        |
|--------|--|---------|---------|--------|
| Totals |  | 3096440 | 100.000 | 141511 |
|--------|--|---------|---------|--------|

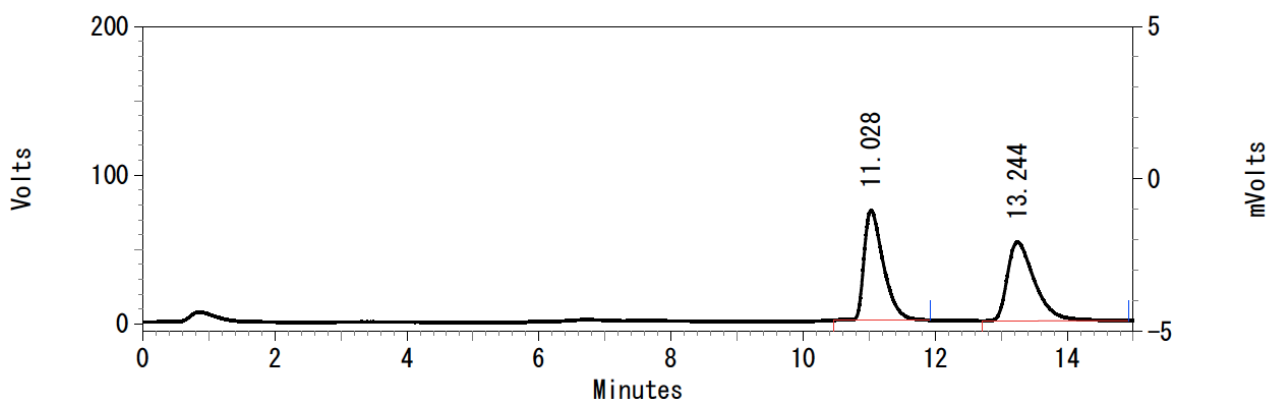

**UV Results**

| Pk # | Retention Time | Area    | Area Percent | Height |
|------|----------------|---------|--------------|--------|
| 1    | 11.028         | 1501068 | 49.704       | 73791  |
| 2    | 13.244         | 1518938 | 50.296       | 52986  |

|        |  |         |         |        |
|--------|--|---------|---------|--------|
| Totals |  | 3020006 | 100.000 | 126777 |
|--------|--|---------|---------|--------|

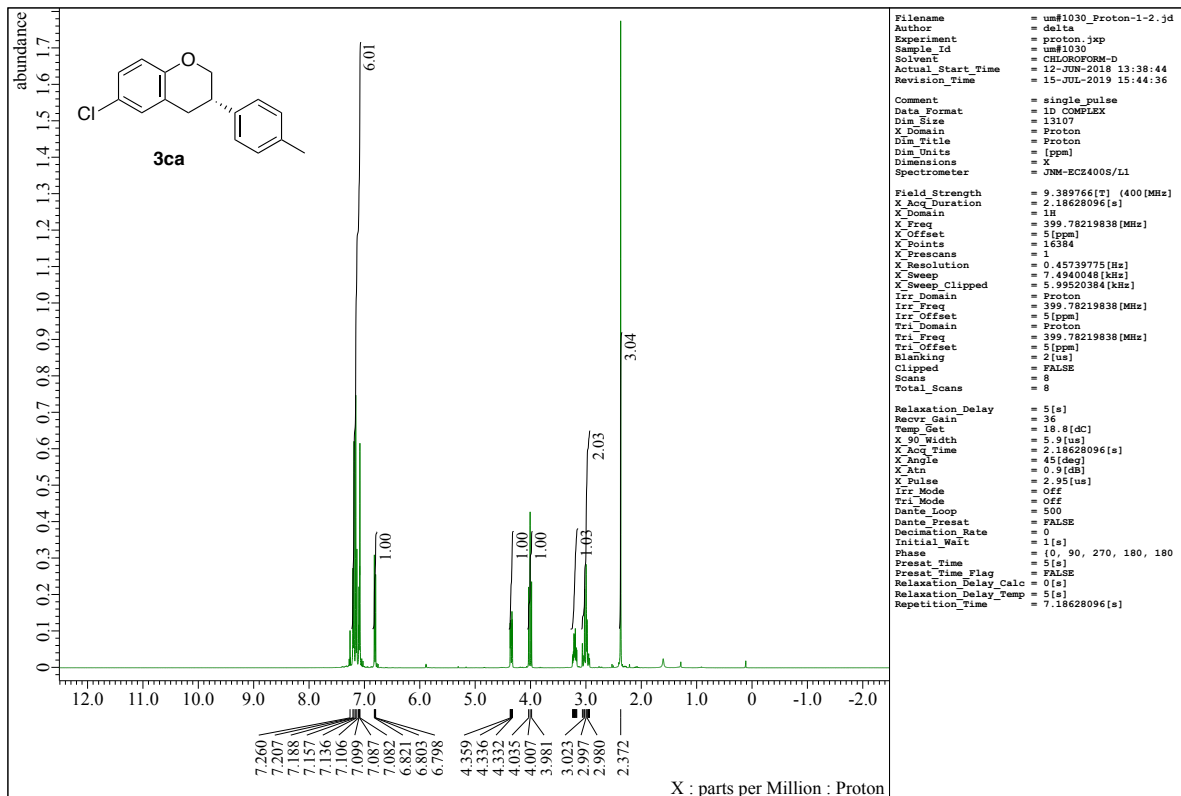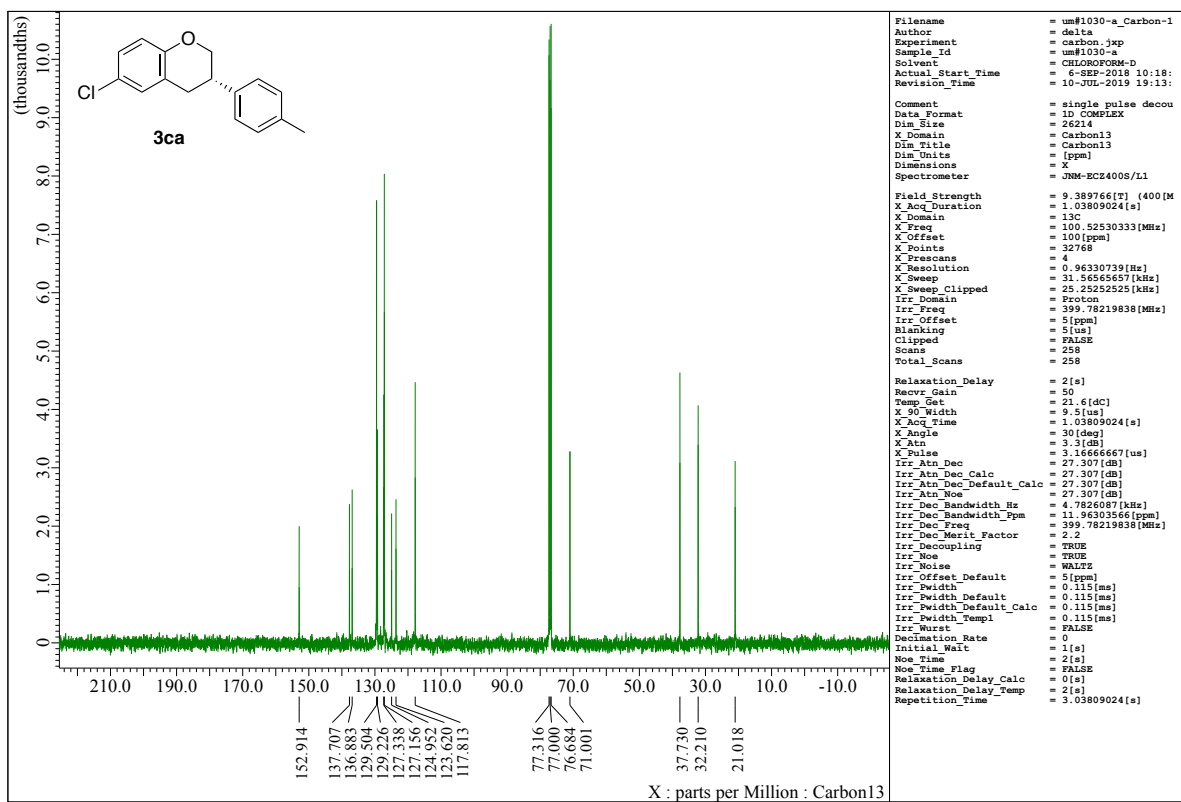

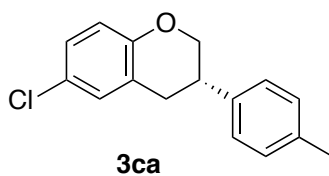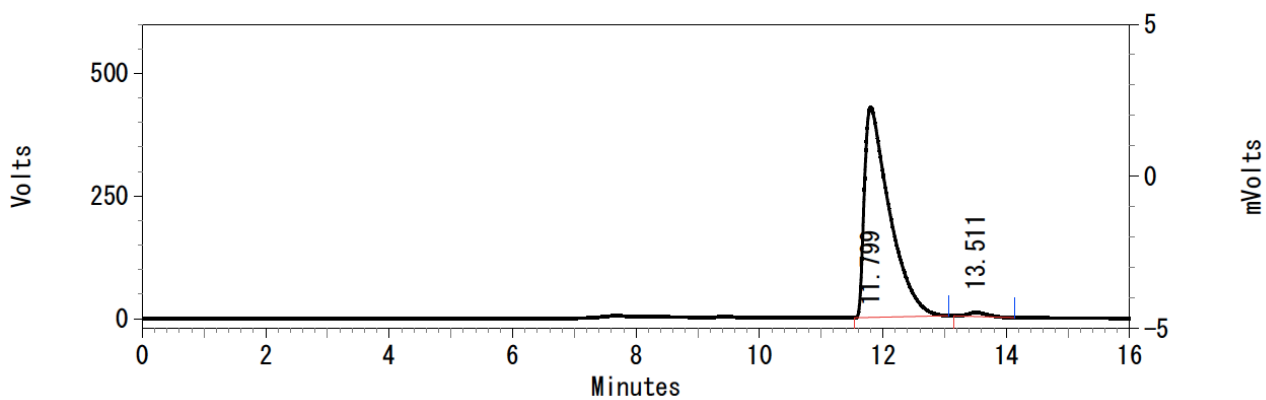

**UV-970 Results**

| Pk #   | Retention Time | Area     | Area Percent | Height |
|--------|----------------|----------|--------------|--------|
| 1      | 11.799         | 12126319 | 98.612       | 428686 |
| 2      | 13.511         | 170682   | 1.388        | 8006   |
| Totals |                | 12297001 | 100.000      | 436692 |

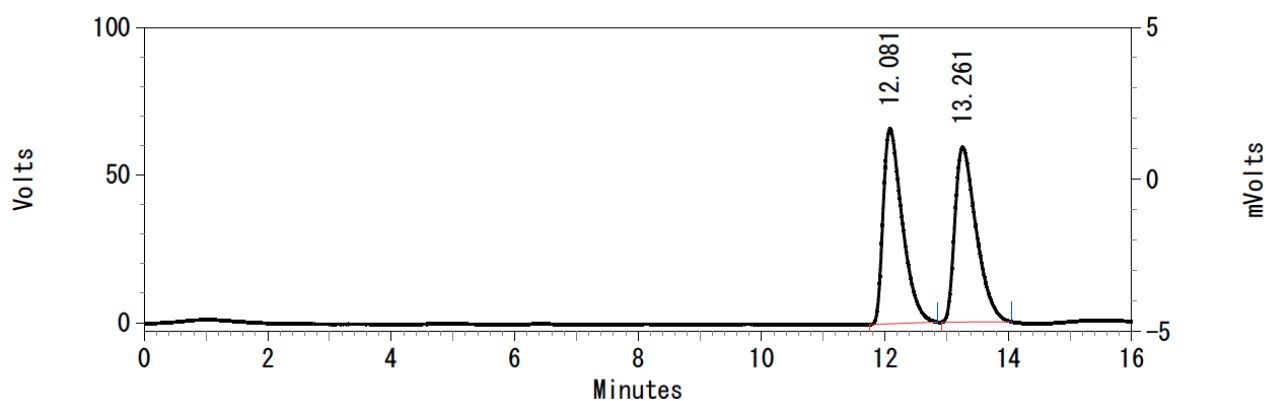

**UV-970 Results**

| Pk #   | Retention Time | Area    | Area Percent | Height |
|--------|----------------|---------|--------------|--------|
| 1      | 12.081         | 1428445 | 50.002       | 66026  |
| 2      | 13.261         | 1428308 | 49.998       | 59213  |
| Totals |                | 2856753 | 100.000      | 125239 |

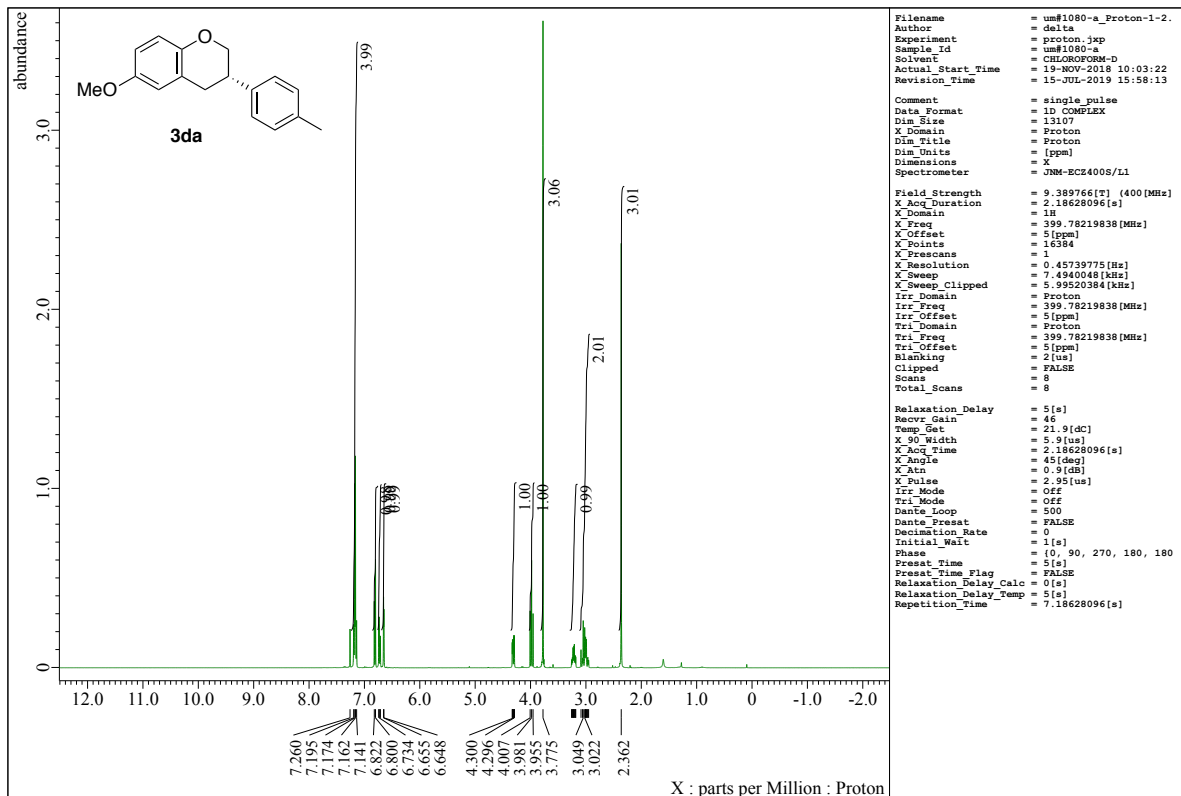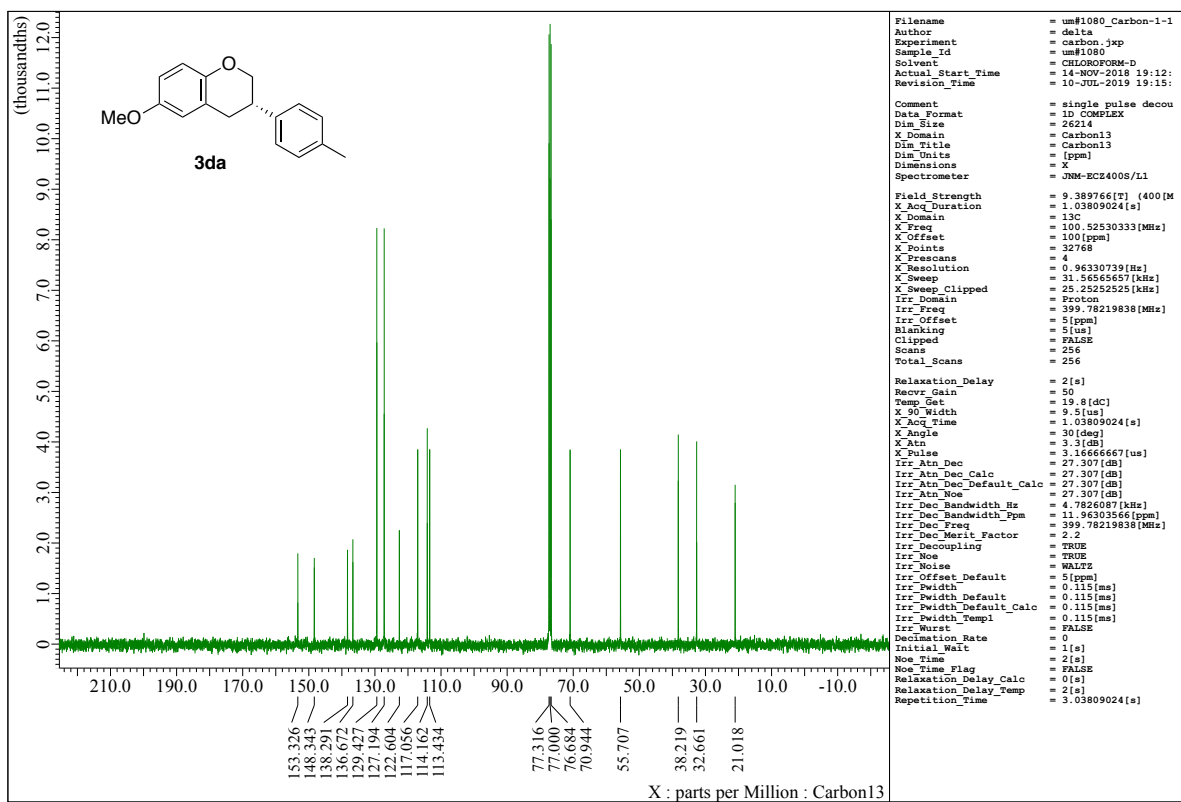

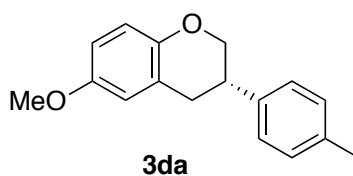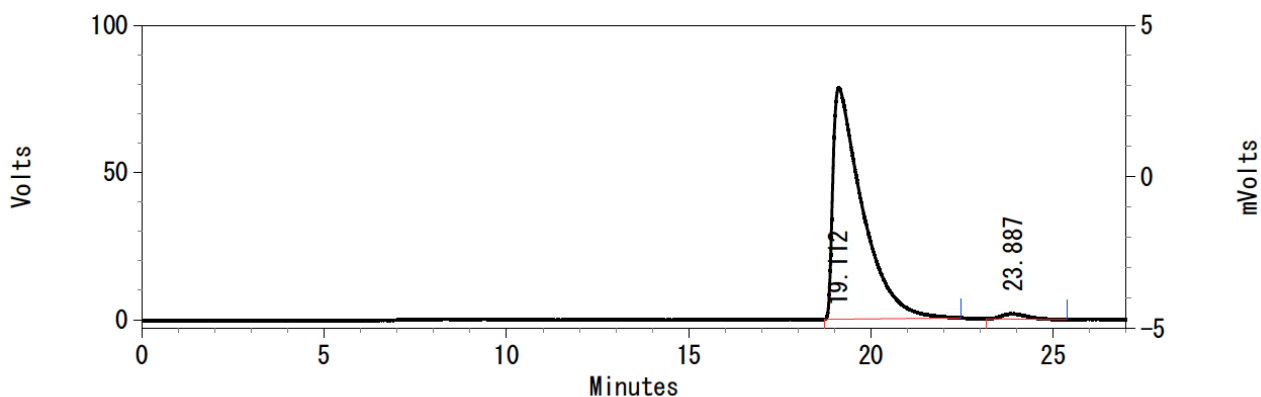

**UV-970 Results**

| Pk #   | Retention Time | Area    | Area Percent | Height |
|--------|----------------|---------|--------------|--------|
| 1      | 19.112         | 4378780 | 98.179       | 78608  |
| 2      | 23.887         | 81208   | 1.821        | 1776   |
| Totals |                | 4459988 | 100.000      | 80384  |

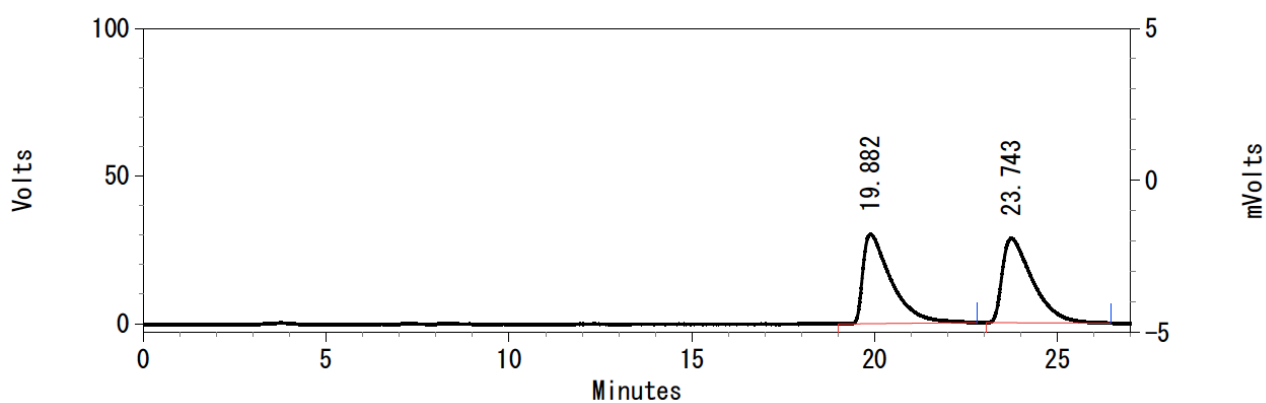

**UV-970 Results**

| Pk #   | Retention Time | Area    | Area Percent | Height |
|--------|----------------|---------|--------------|--------|
| 1      | 19.882         | 1622209 | 49.673       | 30240  |
| 2      | 23.743         | 1643546 | 50.327       | 28618  |
| Totals |                | 3265755 | 100.000      | 58858  |



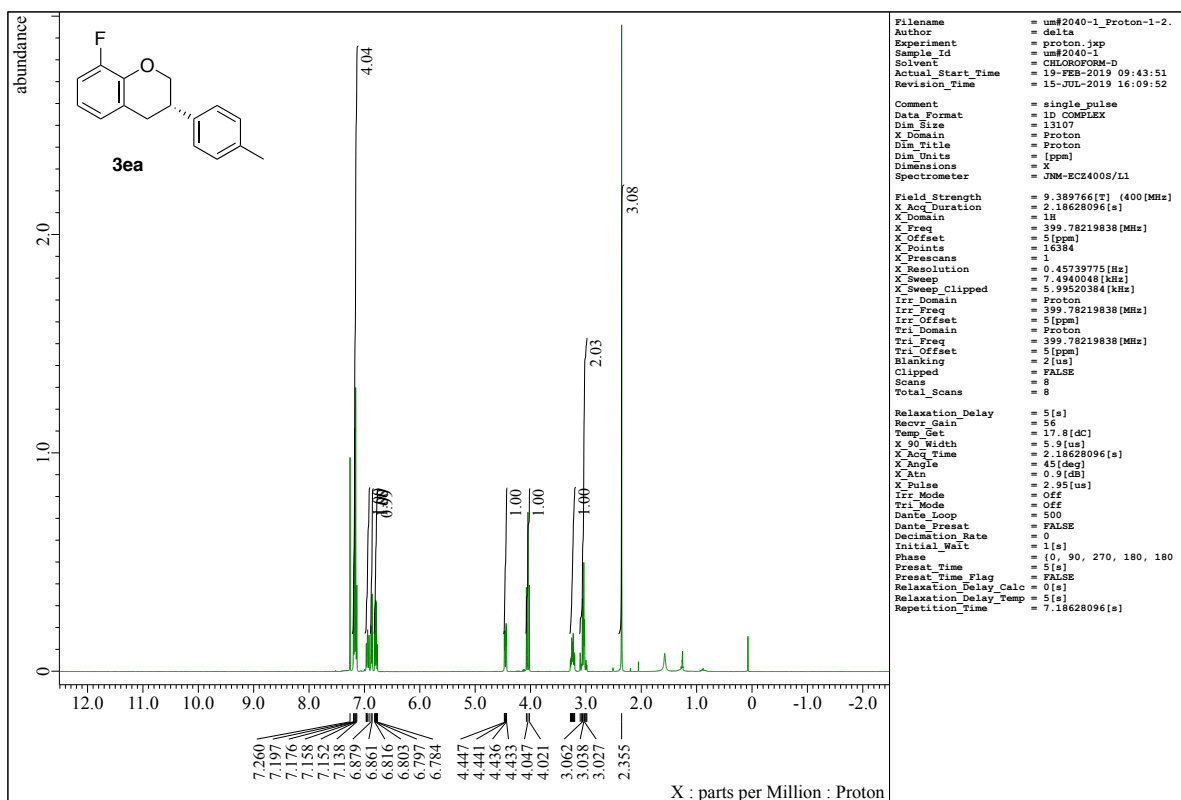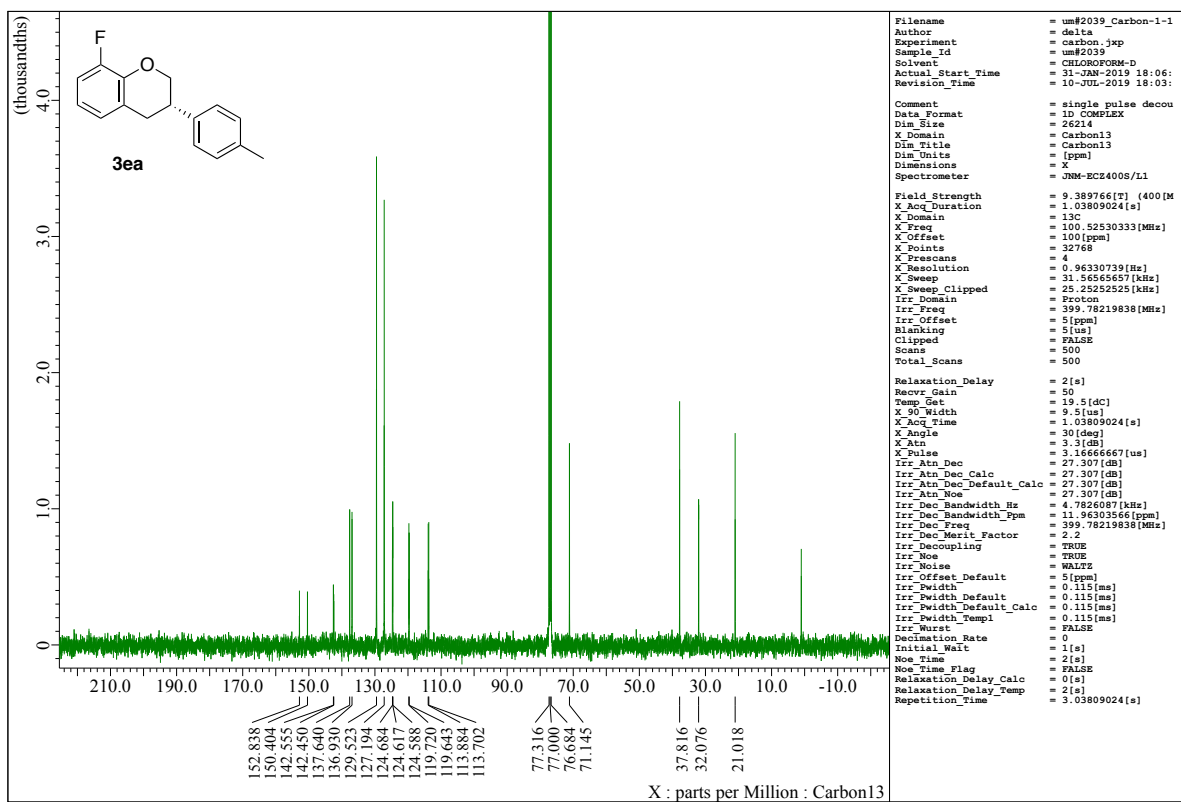

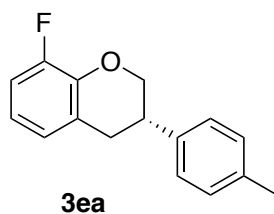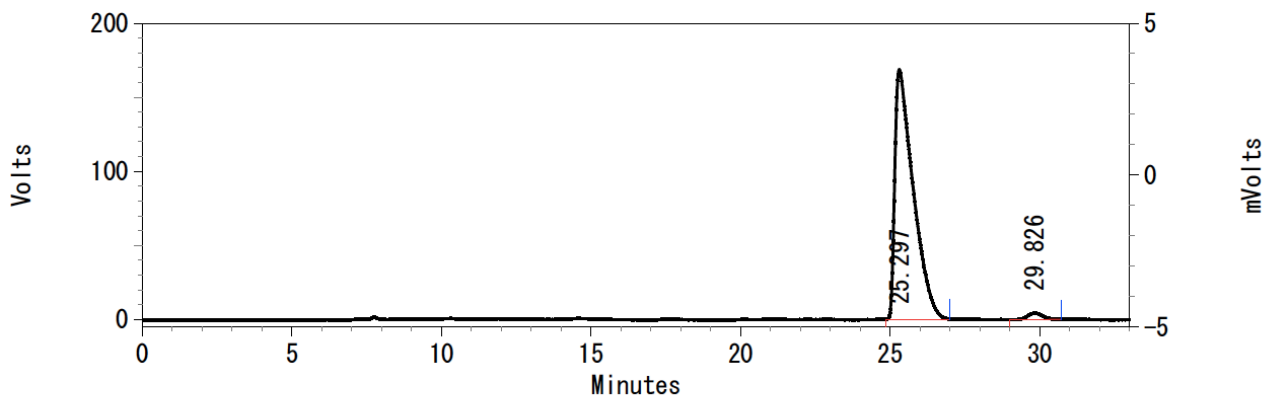

**UV-970 Results**

| Pk # | Retention Time | Area    | Area Percent | Height |
|------|----------------|---------|--------------|--------|
| 1    | 25.297         | 7167956 | 97.937       | 168424 |
| 2    | 29.826         | 151027  | 2.063        | 4355   |

|        |  |         |         |        |
|--------|--|---------|---------|--------|
| Totals |  | 7318983 | 100.000 | 172779 |
|--------|--|---------|---------|--------|

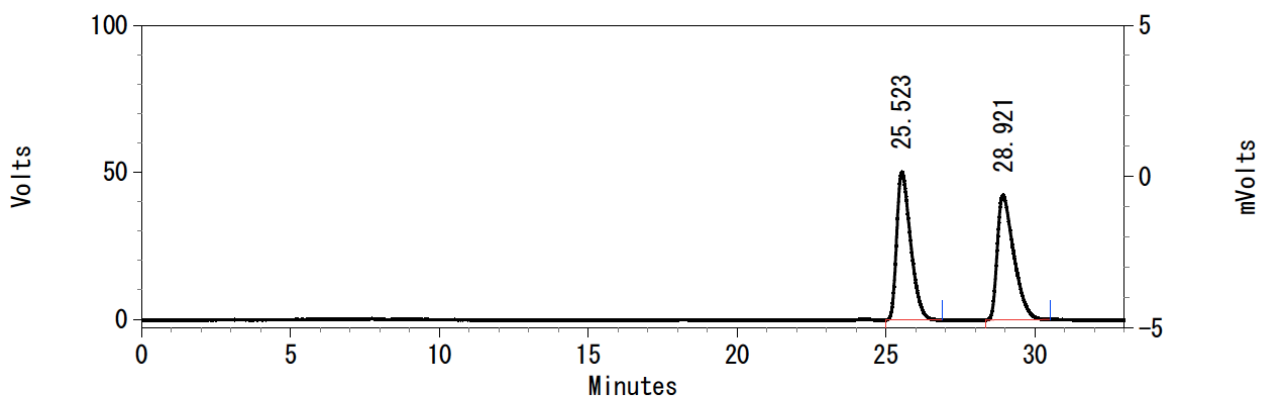

**UV-970 Results**

| Pk # | Retention Time | Area    | Area Percent | Height |
|------|----------------|---------|--------------|--------|
| 1    | 25.523         | 1631474 | 49.943       | 50341  |
| 2    | 28.921         | 1635217 | 50.057       | 42419  |

|        |  |         |         |       |
|--------|--|---------|---------|-------|
| Totals |  | 3266691 | 100.000 | 92760 |
|--------|--|---------|---------|-------|

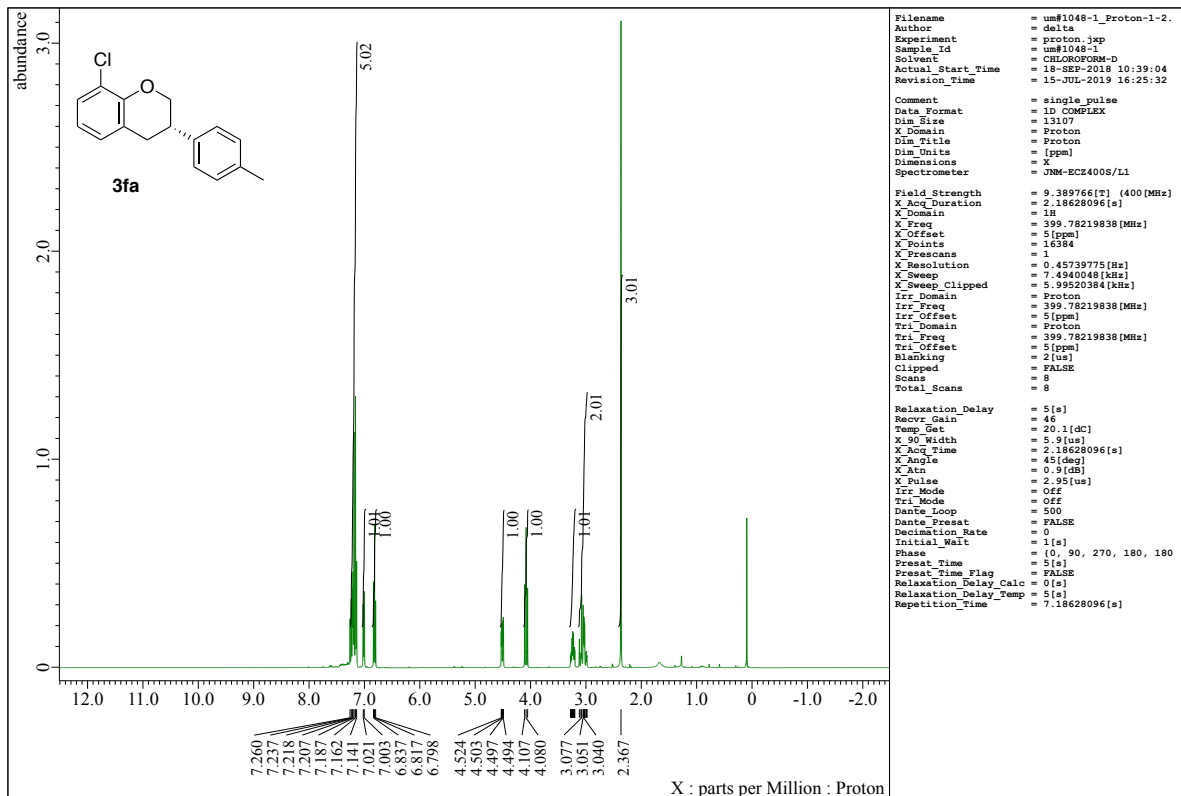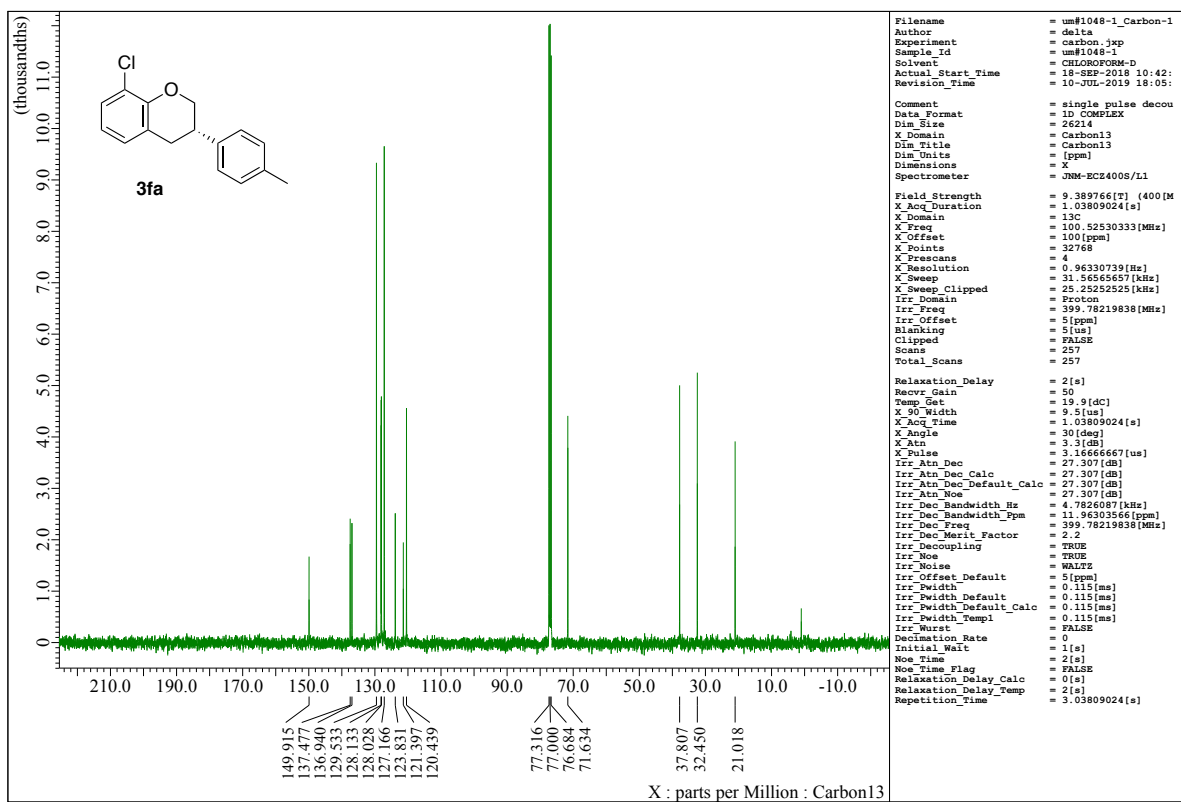

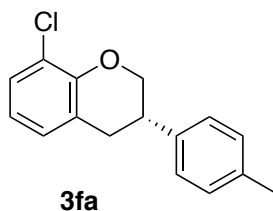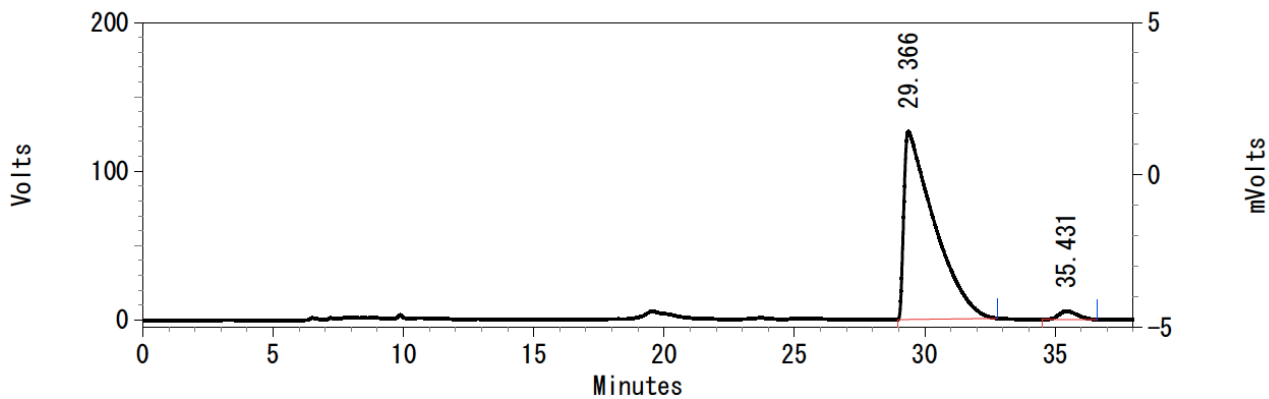

**UV Results**

| Pk #   | Retention Time | Area     | Area Percent | Height |
|--------|----------------|----------|--------------|--------|
| 1      | 29.366         | 10205703 | 97.339       | 126301 |
| 2      | 35.431         | 278967   | 2.661        | 5707   |
| Totals |                | 10484670 | 100.000      | 132008 |

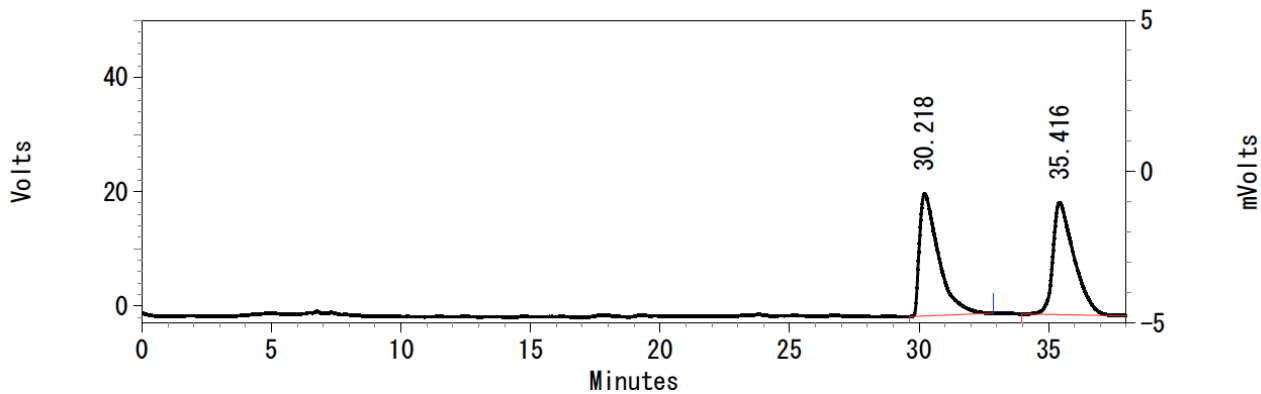

**UV Results**

| Pk #   | Retention Time | Area    | Area Percent | Height |
|--------|----------------|---------|--------------|--------|
| 1      | 30.218         | 1101724 | 49.772       | 21460  |
| 2      | 35.416         | 1111808 | 50.228       | 19602  |
| Totals |                | 2213532 | 100.000      | 41062  |

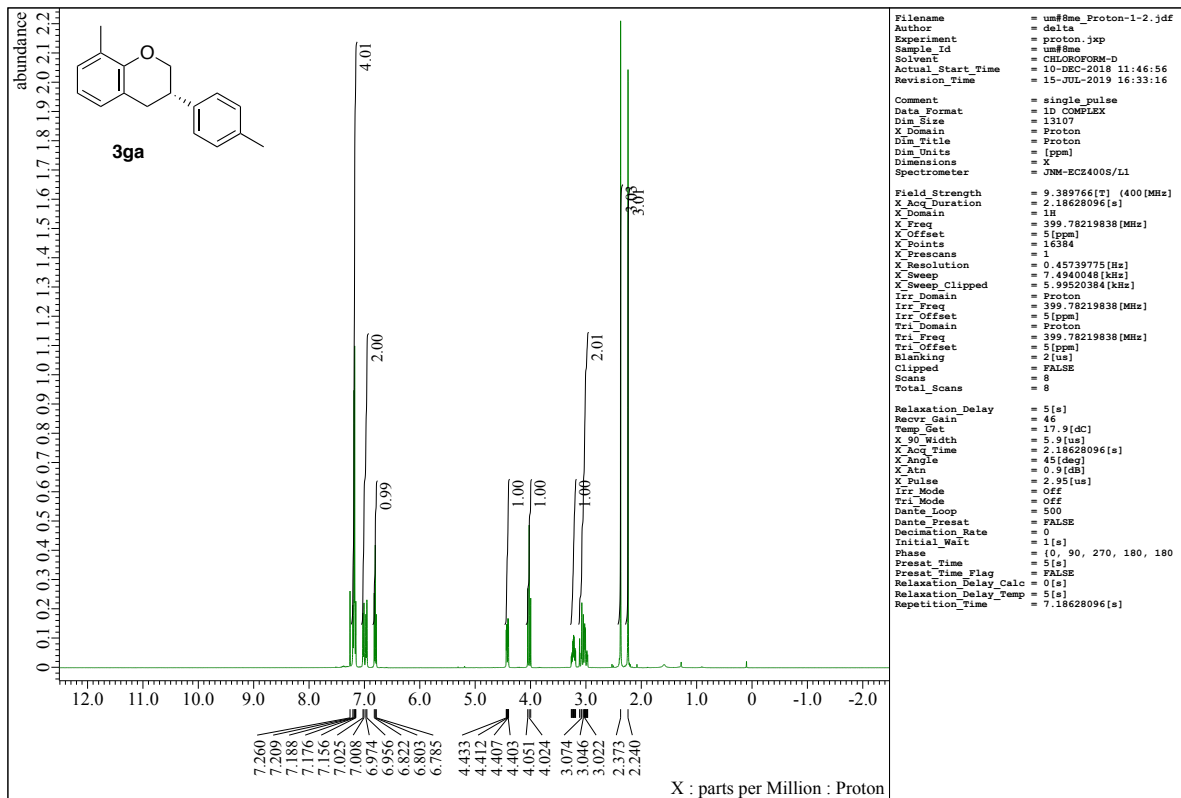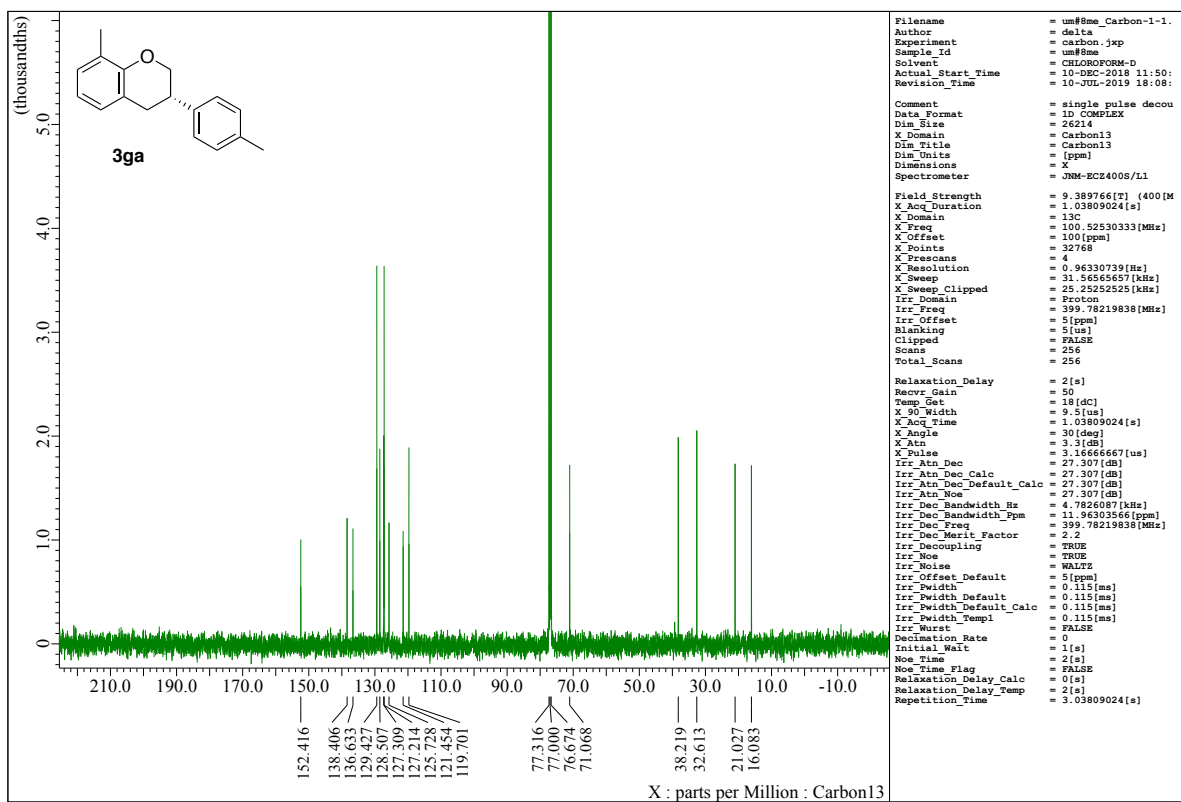

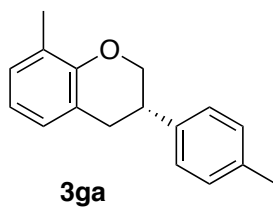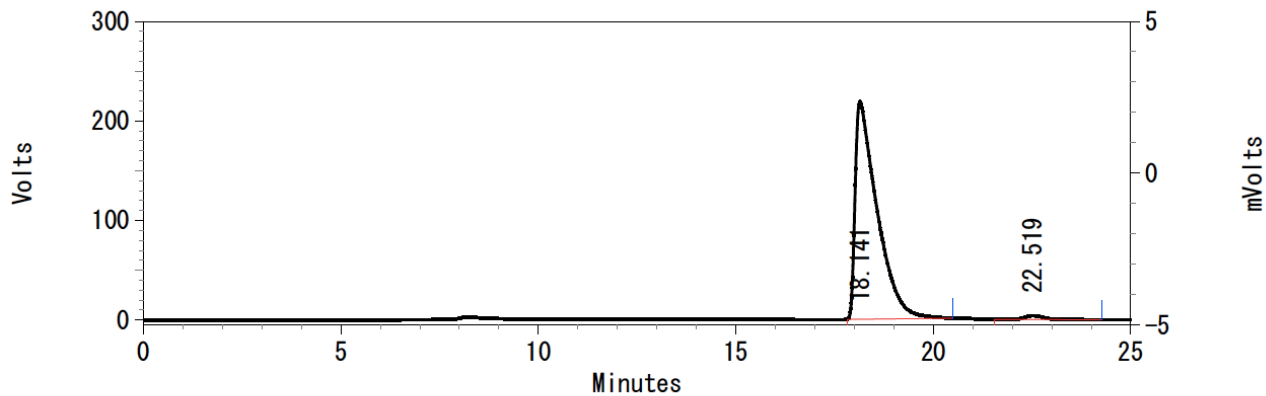

**UV Results**

| Pk # | Retention Time | Area    | Area Percent | Height |
|------|----------------|---------|--------------|--------|
| 1    | 18.141         | 8439272 | 98.429       | 218499 |
| 2    | 22.519         | 134728  | 1.571        | 3950   |

|        |  |         |         |        |
|--------|--|---------|---------|--------|
| Totals |  | 8574000 | 100.000 | 222449 |
|--------|--|---------|---------|--------|

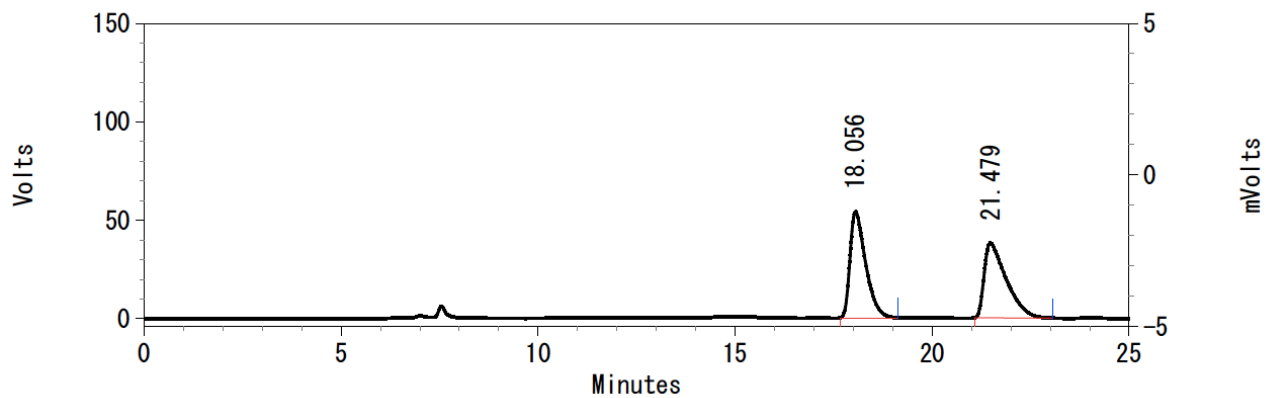

**UV Results**

| Pk # | Retention Time | Area    | Area Percent | Height |
|------|----------------|---------|--------------|--------|
| 1    | 18.056         | 1486736 | 50.198       | 53904  |
| 2    | 21.479         | 1475032 | 49.802       | 38028  |

|        |  |         |         |       |
|--------|--|---------|---------|-------|
| Totals |  | 2961768 | 100.000 | 91932 |
|--------|--|---------|---------|-------|

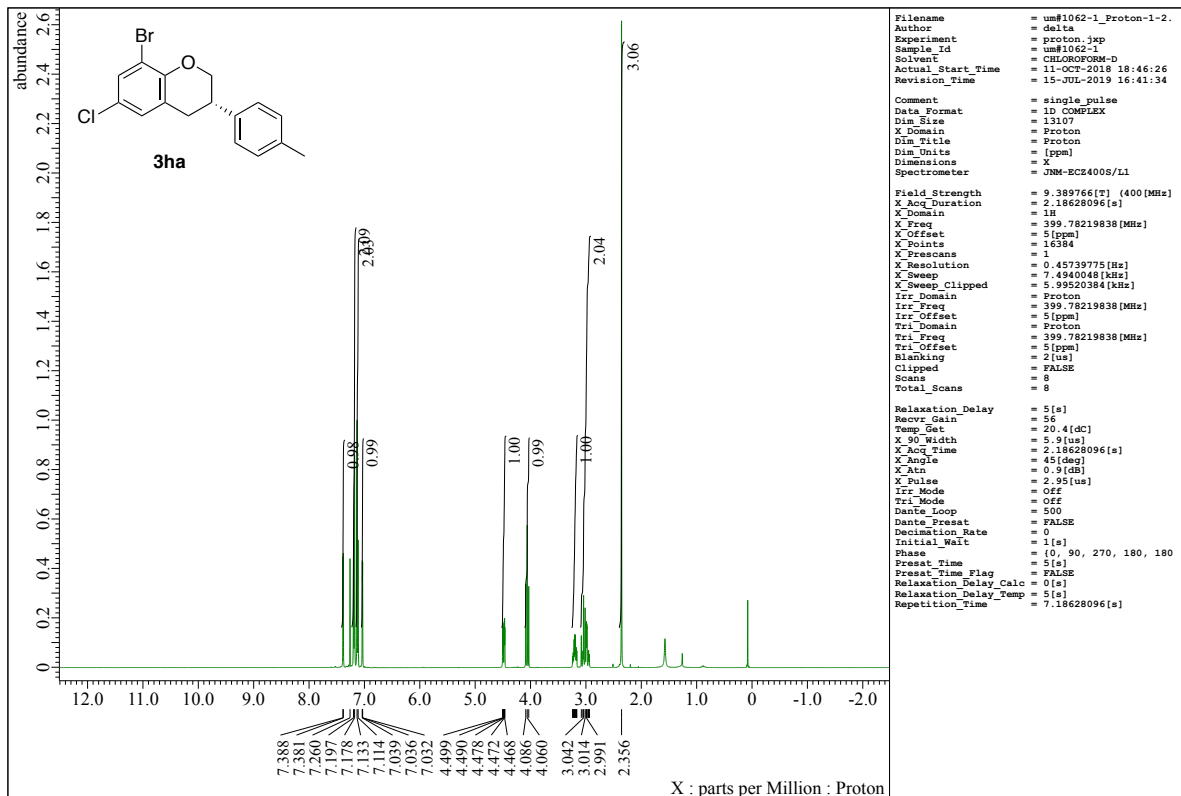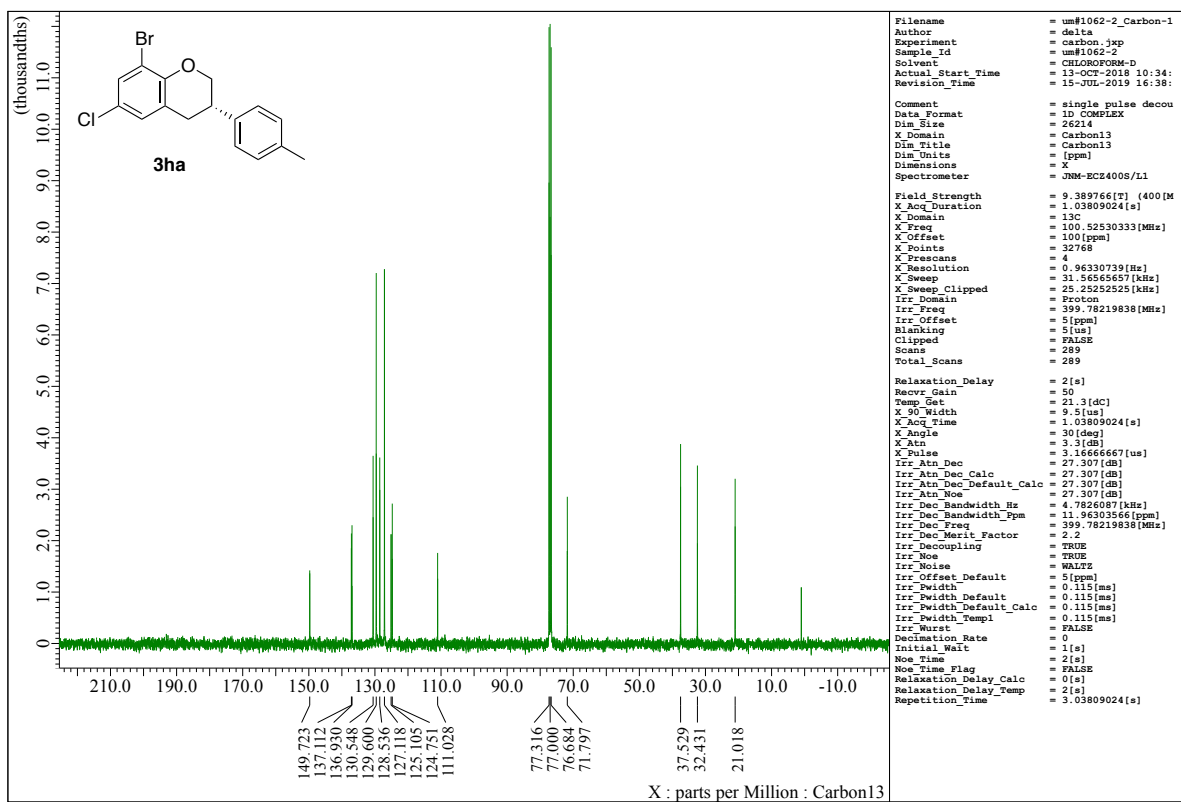

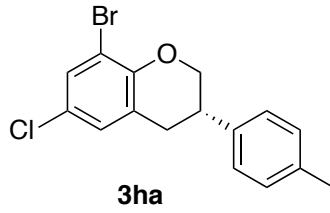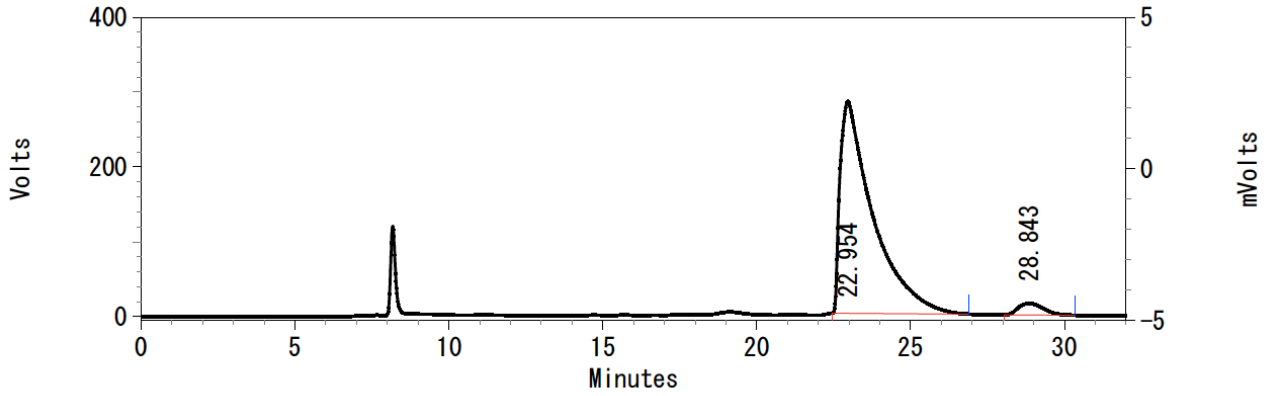

**UV Results**

| Pk #          | Retention Time | Area     | Area Percent | Height |
|---------------|----------------|----------|--------------|--------|
| 1             | 22.954         | 21005321 | 95.964       | 282738 |
| 2             | 28.843         | 883500   | 4.036        | 15452  |
| <b>Totals</b> |                | 21888821 | 100.000      | 298190 |

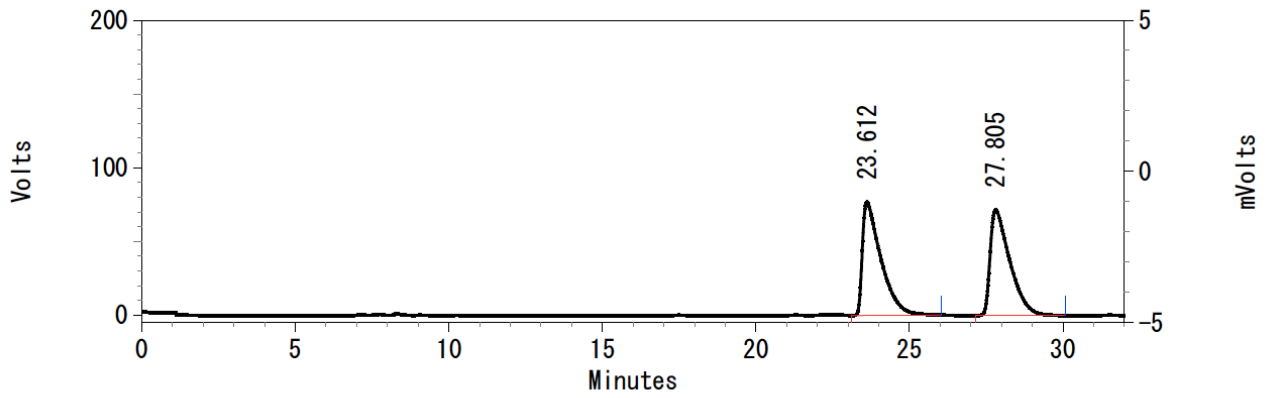

**UV Results**

| Pk #          | Retention Time | Area    | Area Percent | Height |
|---------------|----------------|---------|--------------|--------|
| 1             | 23.612         | 3227093 | 50.358       | 76838  |
| 2             | 27.805         | 3181199 | 49.642       | 71709  |
| <b>Totals</b> |                | 6408292 | 100.000      | 148547 |



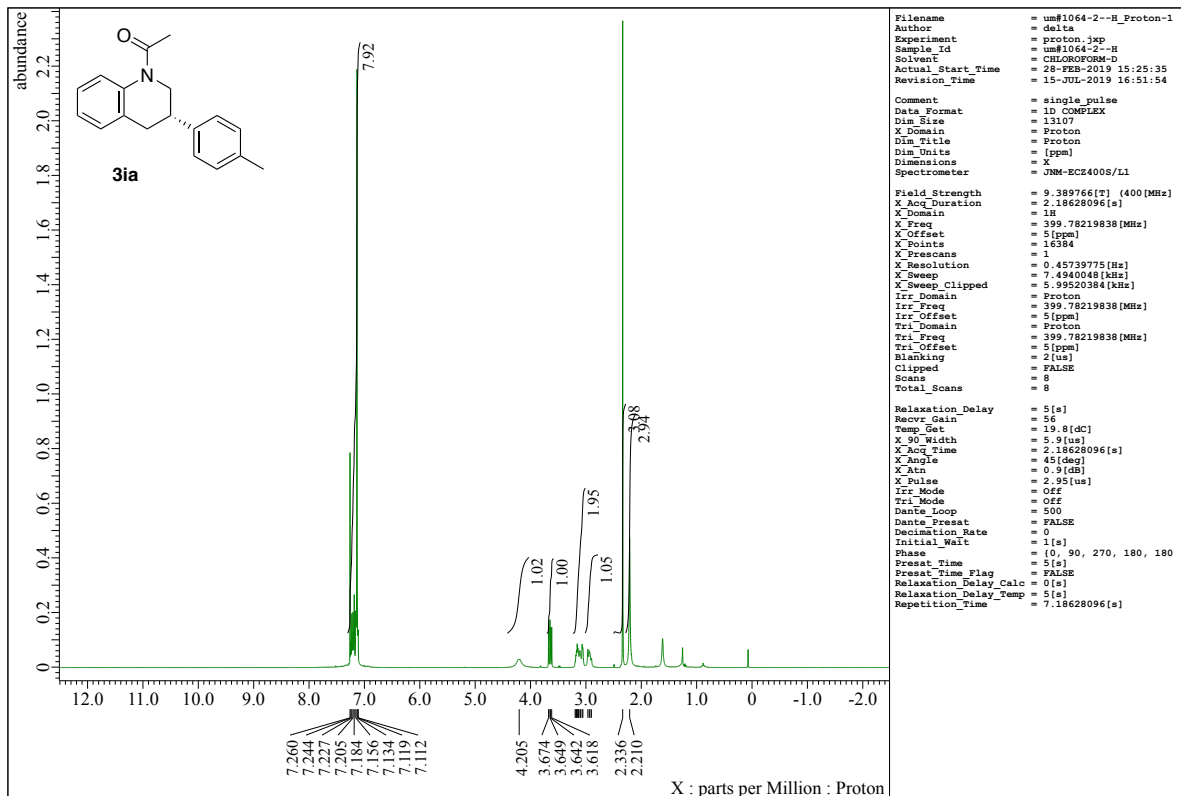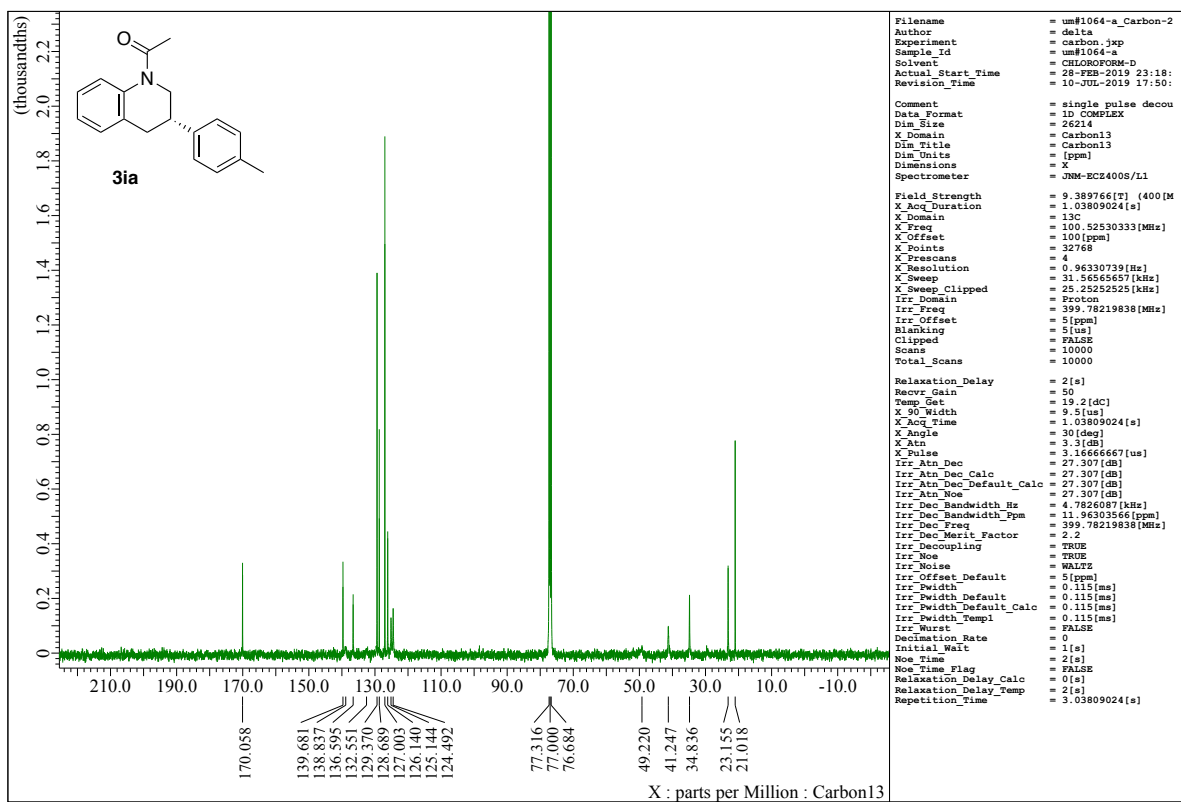

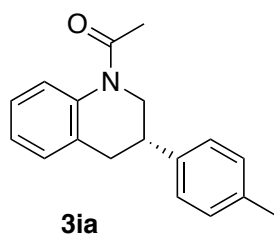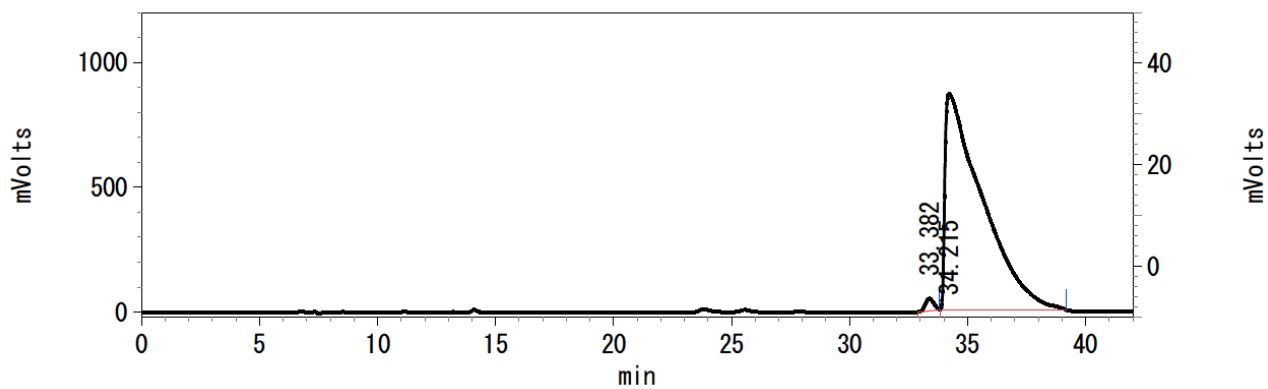

| Pk # | Retention Time | Area     | Area Percent |
|------|----------------|----------|--------------|
| 1    | 33.382         | 1206568  | 1.257        |
| 2    | 34.215         | 94791370 | 98.743       |

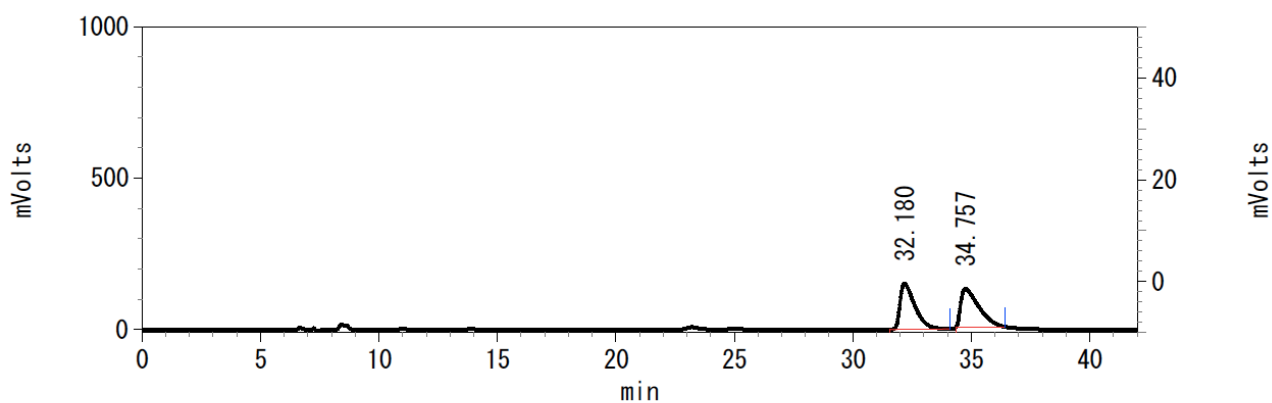

| Pk # | Retention Time | Area    | Area Percent |
|------|----------------|---------|--------------|
| 1    | 32.180         | 6497754 | 49.518       |
| 2    | 34.757         | 6624176 | 50.482       |

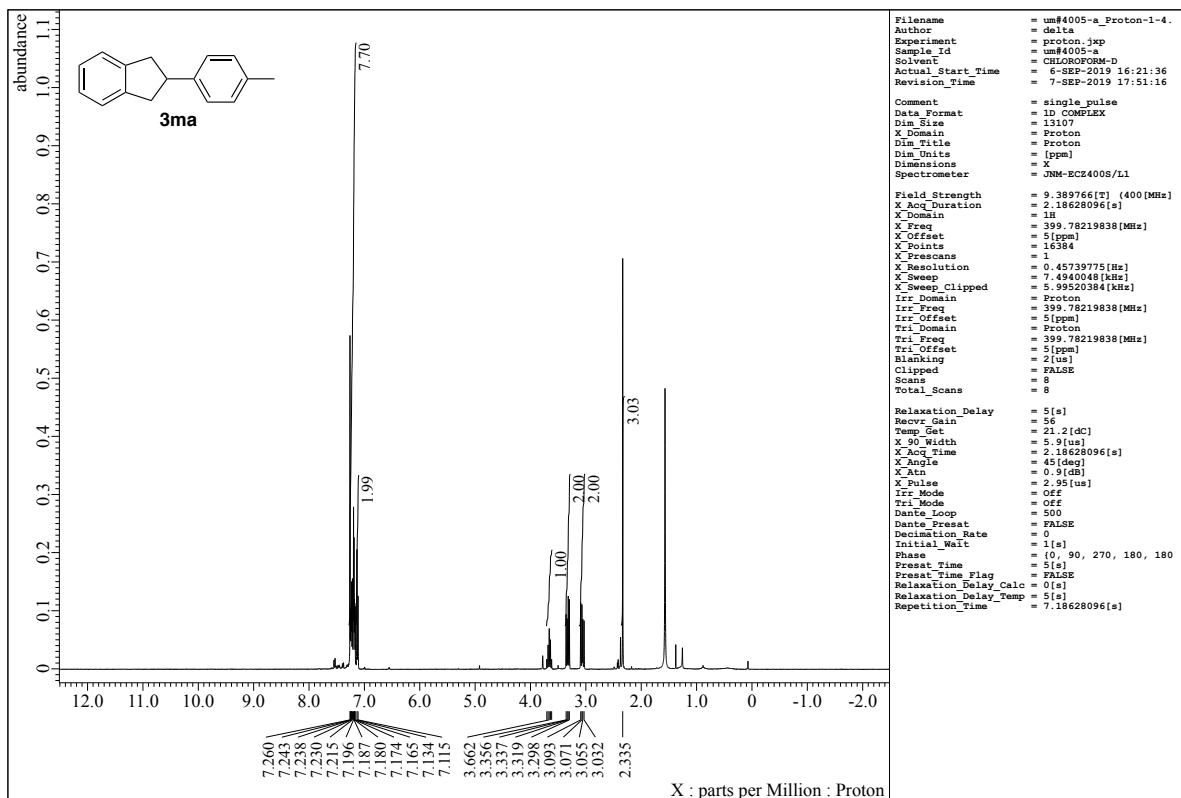

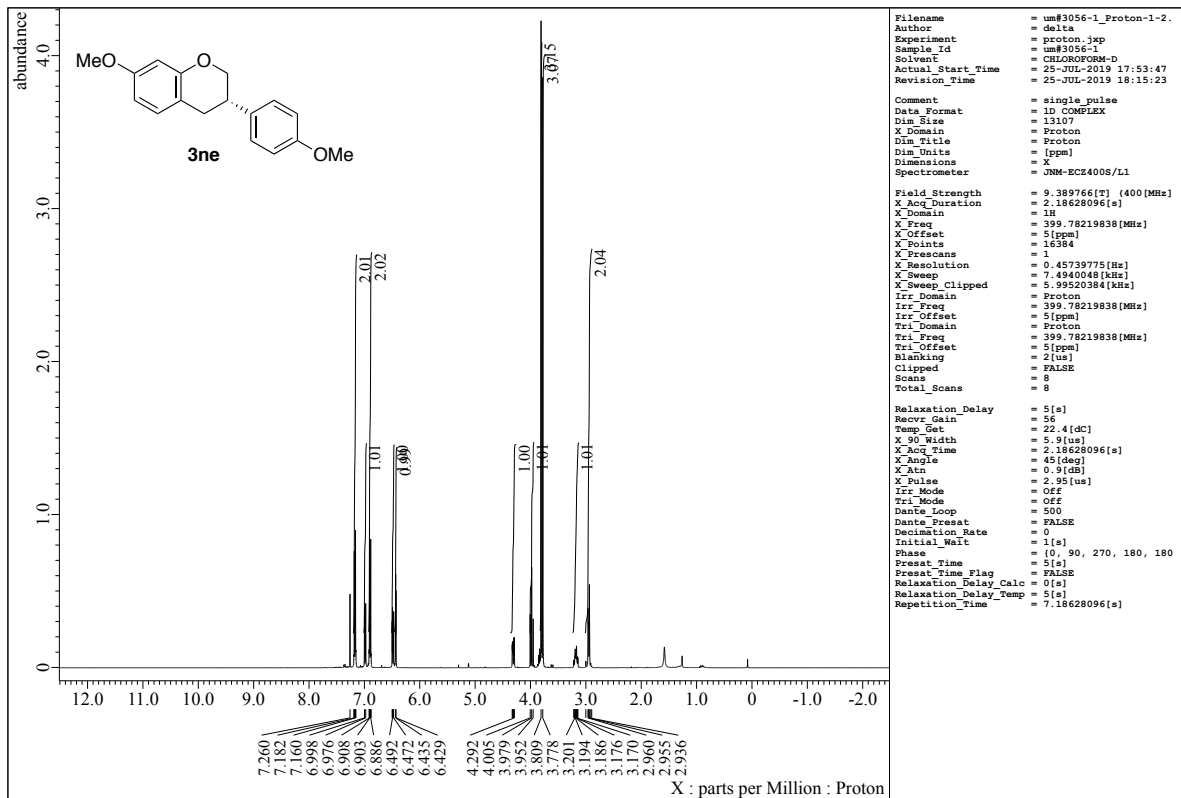

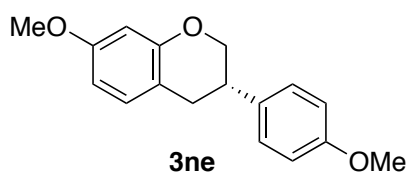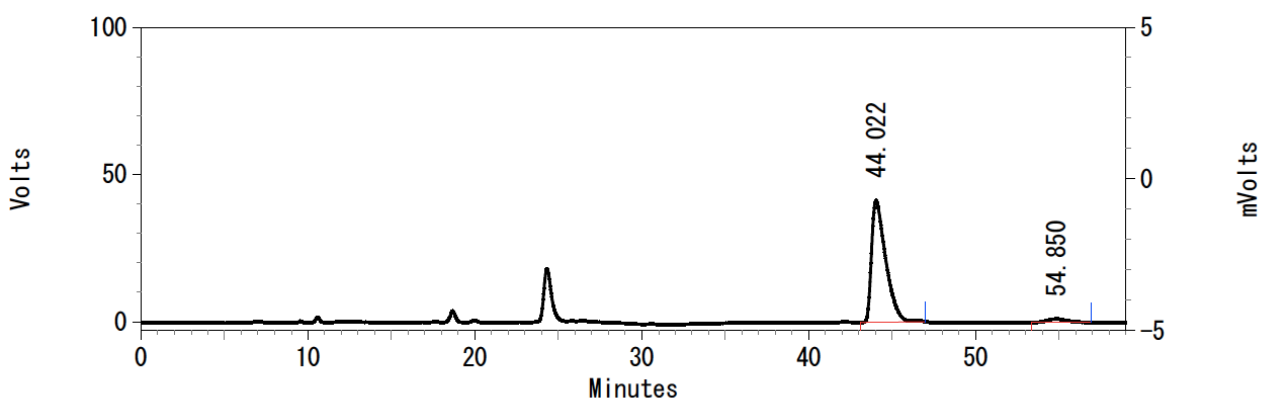

**UV-970 Results**

| Pk # | Retention Time | Area    | Area Percent | Height |
|------|----------------|---------|--------------|--------|
| 1    | 44.022         | 2452356 | 96.105       | 41385  |
| 2    | 54.850         | 99401   | 3.895        | 1247   |

|        |  |         |         |       |
|--------|--|---------|---------|-------|
| Totals |  | 2551757 | 100.000 | 42632 |
|--------|--|---------|---------|-------|

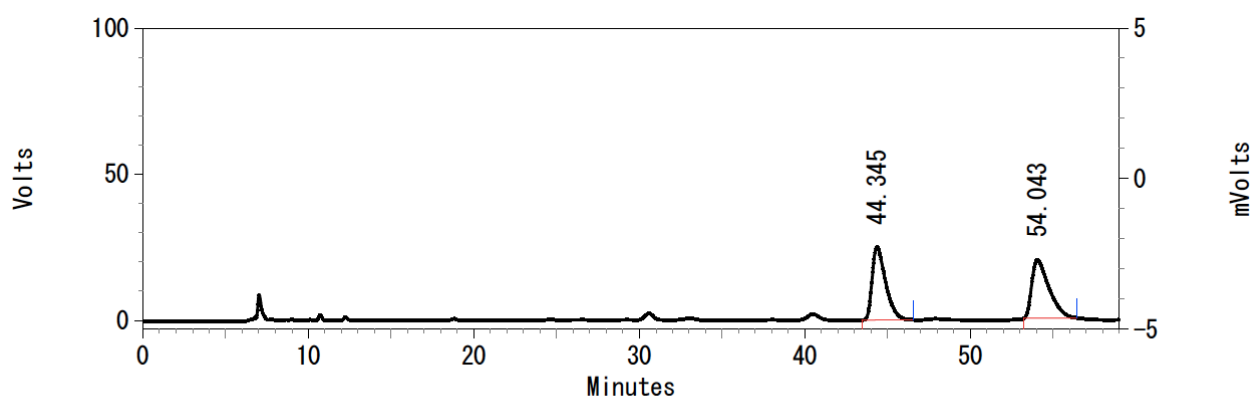

**UV-970 Results**

| Pk # | Retention Time | Area    | Area Percent | Height |
|------|----------------|---------|--------------|--------|
| 1    | 44.345         | 1418728 | 49.598       | 25023  |
| 2    | 54.043         | 1441708 | 50.402       | 19980  |

|        |  |         |         |       |
|--------|--|---------|---------|-------|
| Totals |  | 2860436 | 100.000 | 45003 |
|--------|--|---------|---------|-------|

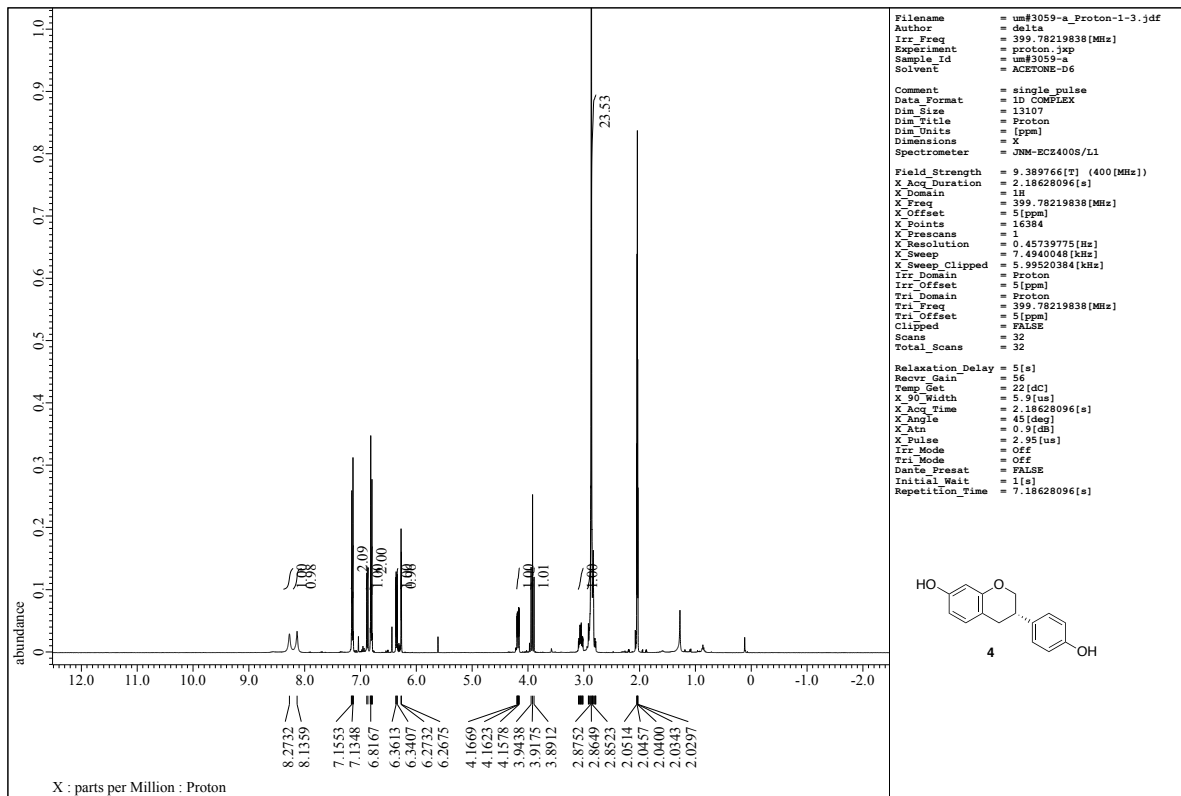

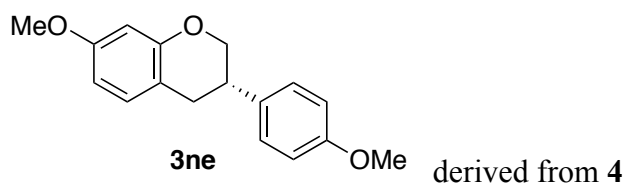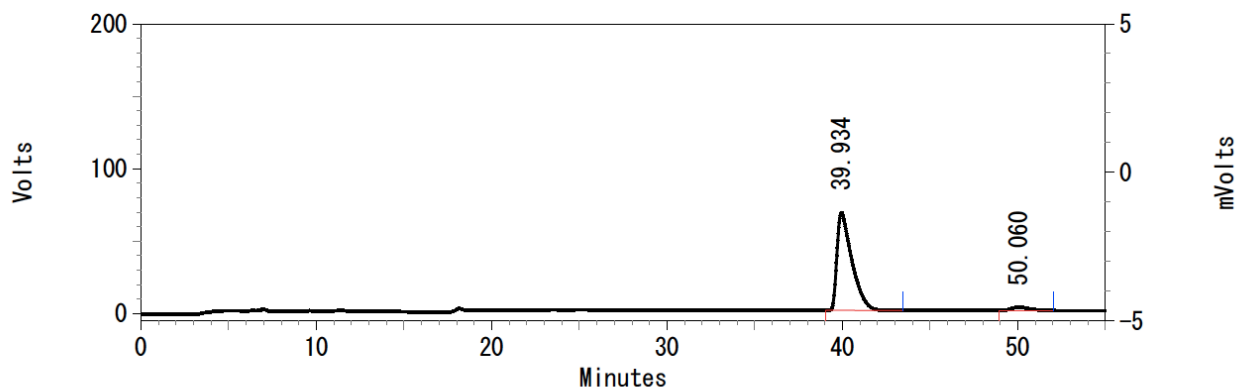

**UV-970 Results**

| Pk #   | Retention Time | Area    | Area Percent | Height |
|--------|----------------|---------|--------------|--------|
| 1      | 39.934         | 3981789 | 95.842       | 67596  |
| 2      | 50.060         | 172734  | 4.158        | 2345   |
| Totals |                | 4154523 | 100.000      | 69941  |

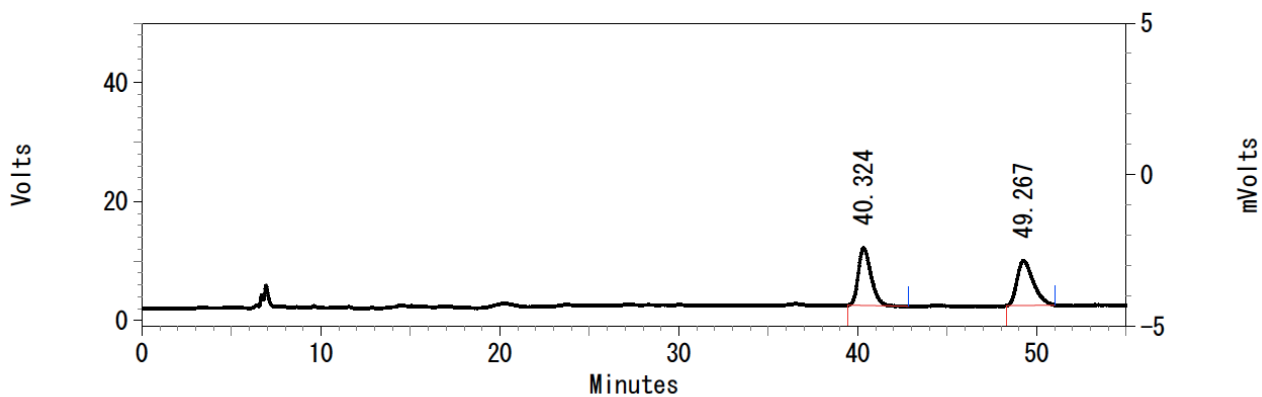

**UV-970 Results**

| Pk #   | Retention Time | Area   | Area Percent | Height |
|--------|----------------|--------|--------------|--------|
| 1      | 40.324         | 472941 | 49.826       | 9661   |
| 2      | 49.267         | 476243 | 50.174       | 7521   |
| Totals |                | 949184 | 100.000      | 17182  |

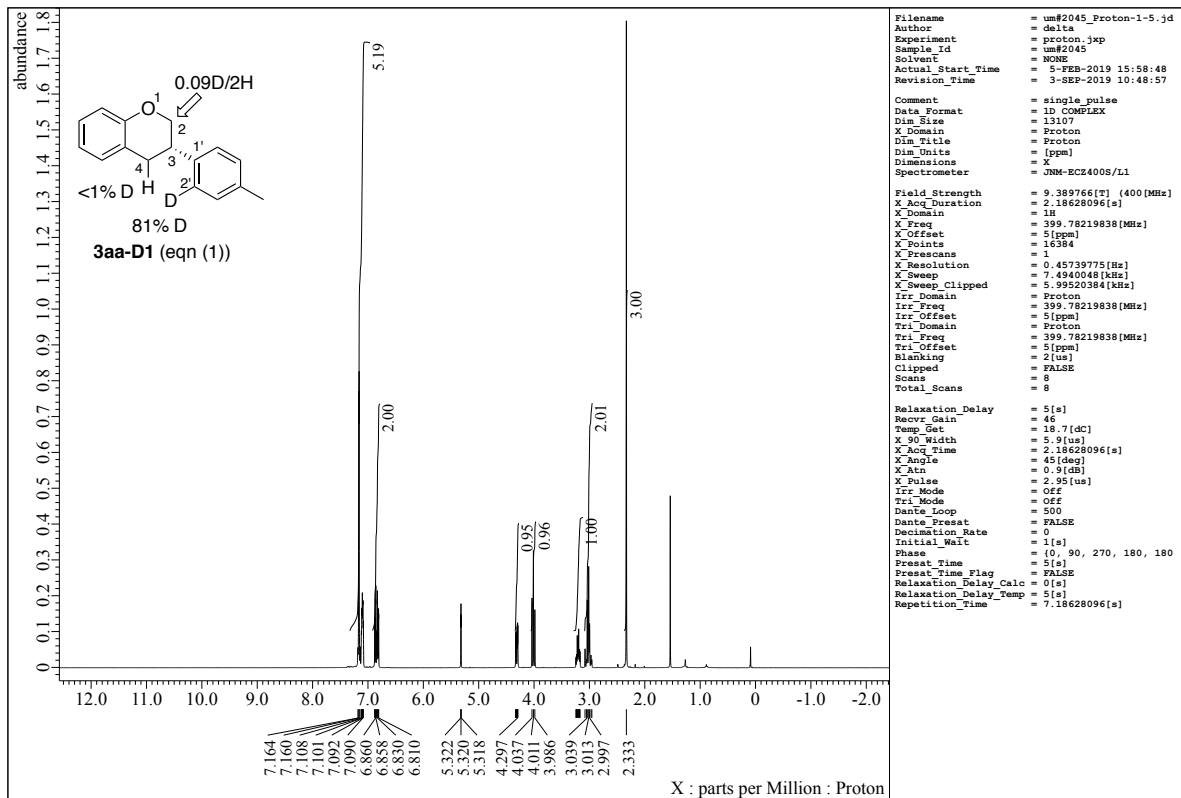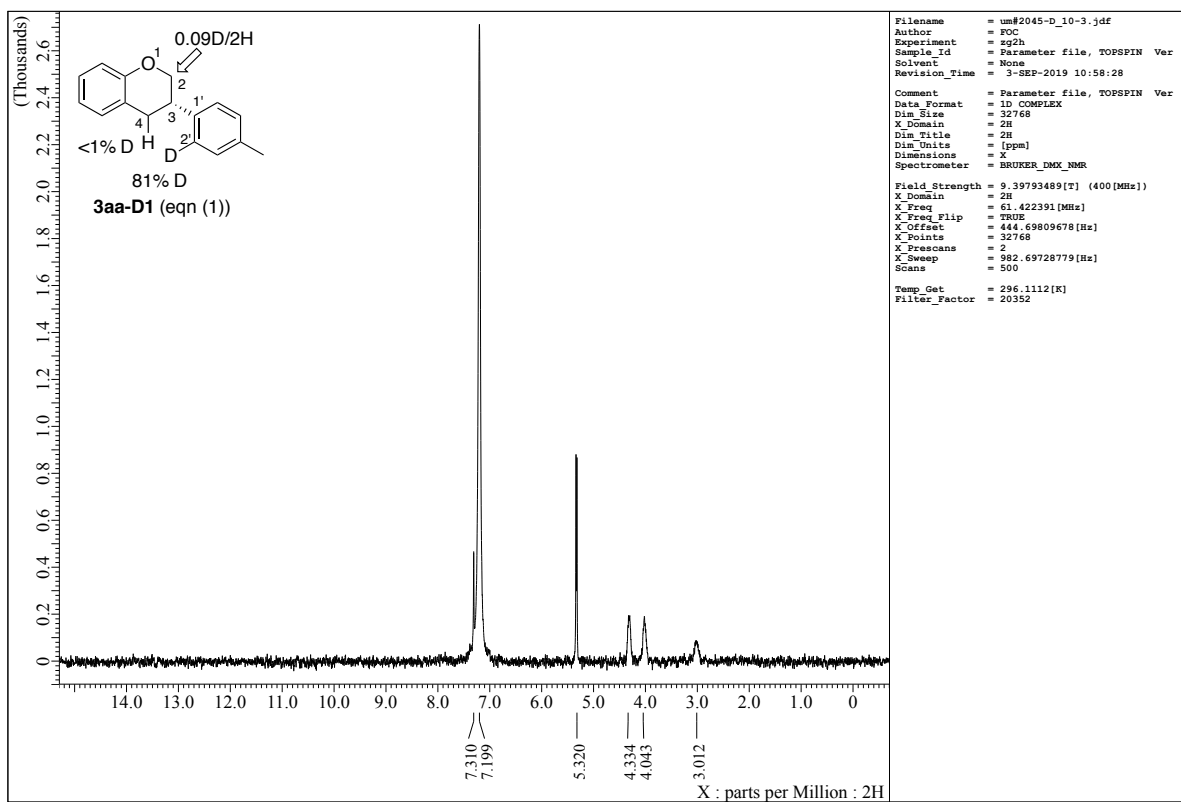



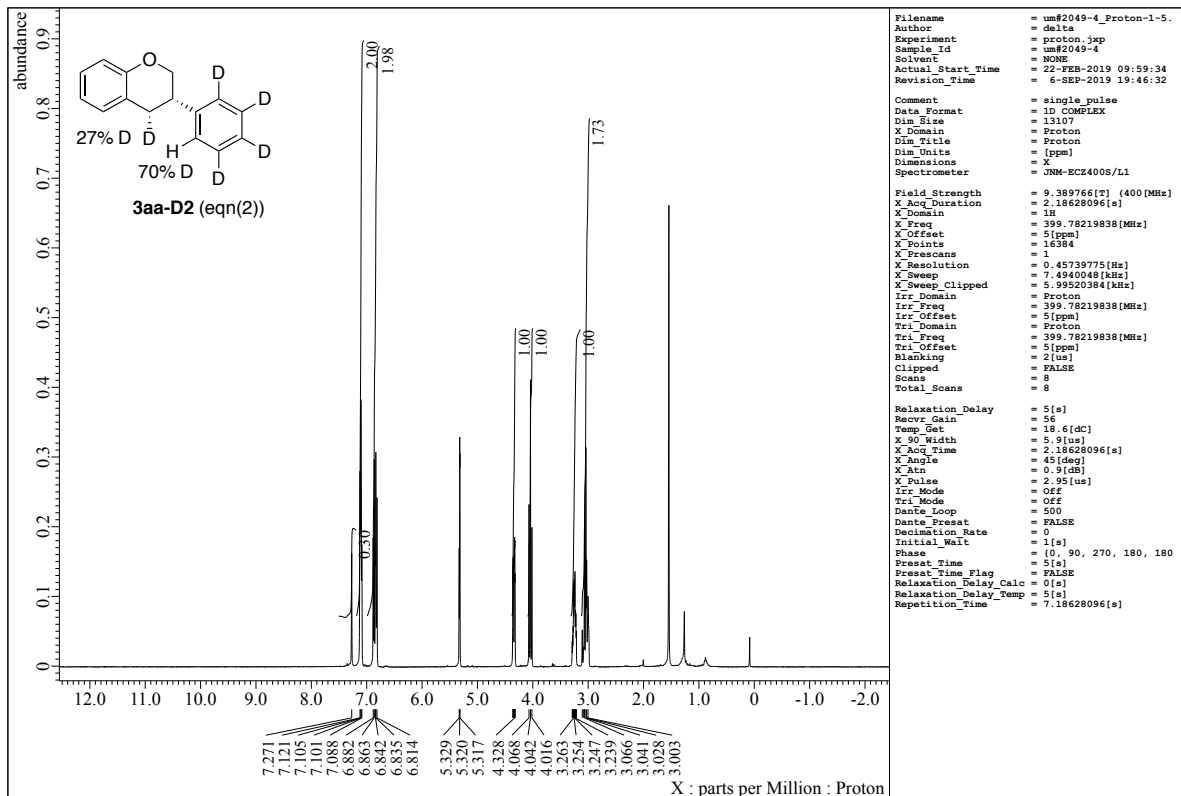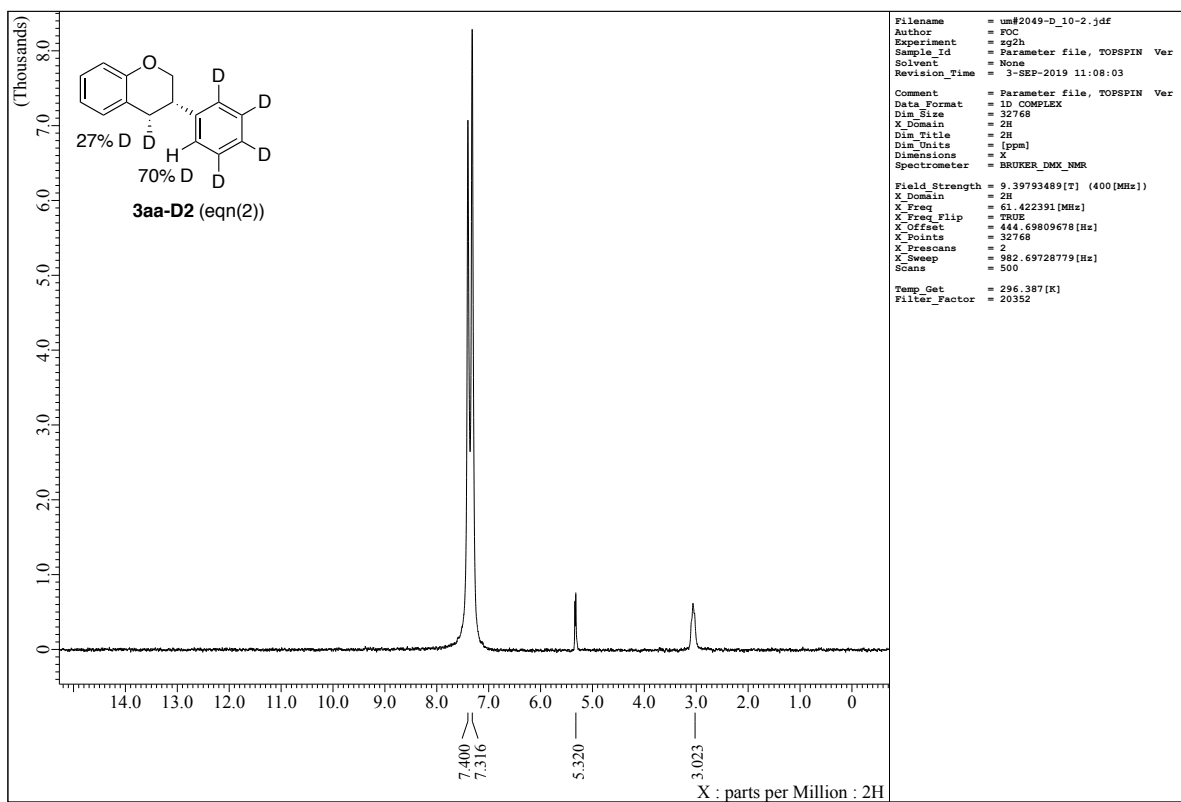

Supplement: c9cc06221a1.pdf [file c9cc06221a1.pdf]
